# Supplementary material for: Genomewide meta‐analysis identifies loci associated with IGF‐I and IGFBP‐3 levels with impact on age‐related traits
Source: PubMed Central journal article supplement (PMC5013013; doi:10.1111/acel.12490), 2016-06-21
Supplement: ACEL-15-811-s001.pdf [file ACEL-15-811-s001.pdf]

**Genome-wide meta-analysis reveals loci associated with circulating levels of  
IGF-I and IGFBP-3 with implications for metabolic and age related traits**

SUPPLEMENTAL MATERIALS

## Table of Contents

|                                                                                                                                                     |           |
|-----------------------------------------------------------------------------------------------------------------------------------------------------|-----------|
| <b>MATERIALS AND METHODS .....</b>                                                                                                                  | <b>3</b>  |
| Meta-Analysis.....                                                                                                                                  | 3         |
| Assessment of Independent Signals.....                                                                                                              | 4         |
| Gene Expression and eQTL Analyses.....                                                                                                              | 5         |
| Association with Plasma Protein Levels.....                                                                                                         | 5         |
| Lookups of Top Loci in Association with metabolites and IGF correlated Traits .....                                                                 | 8         |
| <b>SUPPLEMENTARY FIGURES.....</b>                                                                                                                   | <b>10</b> |
| Supplementary Figure 1: Manhattan Plots of Men and Women Strata.....                                                                                | 10        |
| Supplementary Figure 2: QQ Plots of Meta-Analysis Results .....                                                                                     | 12        |
| Supplementary Figure 3: Regional Association Plots for IGF-I Traits.....                                                                            | 13        |
| Supplementary Figure 4: Regional Association Plots for IGFBP-3 Traits .....                                                                         | 16        |
| Supplementary Figure 5: Results of Bivariate Analysis of IGF-I and IGFBP-3 .....                                                                    | 17        |
| Supplementary Figure 6: Flow chart of the study's design.....                                                                                       | 19        |
| <b>SUPPLEMENTARY TABLES.....</b>                                                                                                                    | <b>20</b> |
| Supplementary Table 1: Characteristics of study cohorts.....                                                                                        | 20        |
| Supplementary Table 2: Assay and genotyping information of study cohorts .....                                                                      | 22        |
| Supplementary Table 3: GWAS results with p-value < 10 <sup>-6</sup> in stage 1.....                                                                 | 24        |
| Supplementary Table 4: Genome-wide significant loci of bivariate analysis.....                                                                      | 25        |
| Supplementary Table 5: Sex interaction results of the 12 genome-wide significant SNPs .....                                                         | 26        |
| Supplementary Table 6: Results of eQTL lookup in the Muther dataset.....                                                                            | 27        |
| Supplementary Table 7: Results of gene expression analysis of the genome-wide significant loci with IGF-I and IGFBP-3 in the SHIP-TREND cohort..... | 35        |
| Supplementary Table 8: Results of pQTL analysis in the SHIP-TREND cohort .....                                                                      | 43        |
| Supplementary Table 9: Lookup of genome-wide significant lead SNPs in IGF-I/IGFBP-3 correlated traits.....                                          | 45        |
| Supplementary Table 10: Lookup of Top IGF-I associated SNPs in associations with survival beyond age 90 years old.....                              | 47        |
| Supplementary Table 11: Lookup of Top IGFBP-3 associated SNPs in associations with survival beyond age 90 years old.....                            | 55        |
| Supplementary Table 12: Enrichment of putative regulatory elements among IGF-1 and IGFBP-3 associated loci.....                                     | 70        |
| <b>REFERENCES .....</b>                                                                                                                             | <b>71</b> |

## Materials and Methods

### *Meta-Analysis*

Individual studies' result files underwent extensive quality control before meta-analysis. File format as well as plausibility and distributions of association results including effects, their standard errors, allele frequency and imputation quality of the SNPs were performed by the *gwasqc()* function of the GWAtoolbox package v1.01 (Fuchsberger *et al.* 2012). All cohort specific  $\lambda_{GC}$  values were between 0.99 and 1.07 for the IGFBP-3 and between 0.98 and 1.08 for the IGF-I outcome. Additionally, the known IGFBP-3 association of rs11977526 in *IGFBP3* was checked for a consistent effect direction and size in each study. The family-based cohorts FHS and MICROS conducted additional analyses on the men and women combined sample by additionally adjusting for sex to account for relatedness in the sex-combined analyses.

In total, GWAS results of ~2.6 million SNPs in at least 50% of the studies were available. Genome-wide significance was defined as a p-value  $< 5 \times 10^{-8}$  correcting for one million independent tests.

Because several studies joined the project after the initial GWAS was finished, we implemented a multi-stage design with two GWAS stages and an additional stage with *de novo* genotyping data to confirm novel loci associated with (IGF-I only) levels. After stage 1 GWAS, all 19 lead SNPs from all traits with a  $P < 10^{-6}$  were taken forward to stage 2. SNPs were selected only once if the smallest P-value was in the overall stratum without adjustment for IGF-I or IGFBP-3, respectively, and if the association had the same effect direction after this adjustment or in the respective sex-stratum. One additional cohort with IGF-I but without genome-wide

data was available for stage 3. Therefore, all IGF-I lead SNPs of novel loci that had a combined stage 1 and stage 2  $P < 10^{-8}$  (except *GCKR*) were selected for *de novo* replication. The lead SNP rs780093 of the *GCKR* locus was already genome-wide significant in stage 1 ( $P = 1.0 \times 10^{-9}$ ) and had a P-value of  $4.8 \times 10^{-6}$  in stage 2 which is significant after Bonferroni correction for 19 tests, and thus was not included in the *de novo* replication due to limited funding. Of the seven SNPs selected for replication, for one SNP (rs1065656 of the *NUBP2* locus) *de novo* genotyping failed. All lead SNPs that were genome-wide significant after the final stage were considered as replicated.

From among all SNPs not being in linkage equilibrium (see Methods) and where results were available from at least 50% of the studies, the SNP with the smallest P-value was selected as lead SNP for the respective locus and trait. Of note, the combined stage 1 and stage 2 GWAS meta-analysis did not reveal any additional loci with a P-value  $< 10^{-8}$ . However, if there was a SNP in high LD with a lead SNP and also having a smaller p-value than the lead SNP after this combined analysis, this SNP was selected as the new lead SNP of the respective locus.

### ***Assessment of Independent Signals***

The analysis of secondary signals in the *NUBP2* locus was performed using the software GCTA (Yang *et al.* 2011) and the genotypes of the SHIP cohort, and was verified by a second analysis using the genotypes of the NHS/HPFS cohorts. The GC-corrected and QC filtered meta-analysis results and a condition list containing the lead SNPs of the final loci were used as input for the conditional analysis. An additional hit was found if the conditional P-value was below genome-wide significance. Subsequently, this SNP was added to the condition list and the

conditional analysis was performed again until no additional significant independent association was found.

### ***Gene Expression and eQTL Analyses***

For each of the lead SNP of the significant loci after final stage, significant cis eQTL associations in whole blood were looked-up in the publically available association result database (Westra *et al.* 2013). We also looked-up cis eQTL associations for lead SNPs in “MuTHER” (<http://www.muther.ac.uk/>) (Grundberg *et al.* 2012). Lymphocytes (LCLs and in some, fresh lymphocytes); subcutaneous fat; muscle and skin biopsies have been obtained from ~856 twins (1/3 monozygotic, 2/3 dizygotic) from the well-characterised TwinsUK BioResource.

Association analysis of whole blood gene expression data with serum IGF-I and IGFBP-3 measurements was conducted in 986 samples of the SHIP-TREND cohort. The gene expression levels were obtained and normalized as described previously (Schurmann *et al.* 2012). Gene expression levels were used as outcome in a linear regression model including the serum IGF-I or IGFBP-3 values as independent variable by adjusting for sex, age, red and white blood cell counts, RNA integrity number, sample storage time, and RNA amplification and labeling batch as a factor. For sensitivity analyses, BMI was included as an additional covariate in the model. The SHIP-TREND expression dataset is available at GEO (Gene Expression Omnibus) public repository under the accession GSE 36382.

### ***Association with Plasma Protein Levels***

The complexity of the plasma proteome presents an analytical challenge. Therefore, we subjected the plasma samples to immunoaffinity subtraction using the Multiple Affinity

Removal System (MARS) (Agilent Technologies, Wilmington, DE, USA) coupled to a ProteomeLab PF 2D system (Beckman Coulter, Brea, CA, USA). In brief, 20  $\mu$ L plasma was diluted with 60  $\mu$ L buffer A, transferred to a 0.22  $\mu$ m spin filter and centrifuged for 1 min at 16,000 $\times$ g to remove crude particles. The supernatant was loaded on the MARS-6 column (4.6 x 50 mm) for the depletion of the TOP-6 plasma proteins. The flow through with the low-abundant proteins was collected using the fraction collector and immediately stored at -80°C. The depleted plasma samples were sequentially incubated in the presence of dithiothreitol (0.12% w/v) at 37°C for 30 min and precipitated using trichloroacetic acid (TCA) at a final concentration of 10% (v/v). Solubilized protein was determined using a Bradford assay with bovine serum albumin as standard (Bio-Rad, Hercules, CA, USA).

Protein lysates were investigated by liquid chromatography mass spectrometry. In total, 4  $\mu$ g protein lysates were reduced (2.5 mM DTT for 1 h at 60°C) and alkylated (10 mM iodoacetamide for 30 min at 37°C). Proteolysis was performed overnight using trypsin (Promega, Madison, WI, USA) with a ratio of 1:25 at 37°C. The tryptic digestion was stopped by adding acetic acid at the final concentration of 1%, followed by desalting and purification using ZipTip- $\mu$ C18 tips (Millipore, Billerica, MA, USA). Large scale proteomics requires, firstly, a randomized/blinded samples preparation to reduce the introduction of technical variance, secondly, divide the whole sample cohort into similar-numbered MS measuring blocks (= "batch") to later bioinformatically adjust the technical variance introduced by LC-MS analysis in order to ensure routinely MS service, maintenance and calibration procedures during the MS sample acquisition.

Proteolytically cleaved peptides were separated prior to mass spectrometric analyses by reverse phase nanoACQUITY UPLC system (Waters, Milford, MA, USA) on a BEH130 C18 column (10 cm length, 100  $\mu\text{m}$  inner diameter and 1.7  $\mu\text{m}$  particle size, Waters) at a constant flow rate of 400 nL/min. Separation was achieved using a non-linear gradient of buffer B from 2% up to 60% within 90 min with 0.1% acetic acid, 2% acetonitrile in water (solvent A) and 0.1% acetic acid in 100% acetonitrile (solvent B). Separated peptides were monitored using an LTQ Orbitrap Velos MS (Thermo Scientific) equipped with a nano electrospray ion source operated with PicoTip Emitters (New Objective, Woburn, MA, USA). The MS instrument was operated in data-dependent MS/MS mode, after a first survey scan ( $r=30,000$ ) MS/MS data were recorded for the Top-20 peaks in the ion trap at a collision induced energy (CID) of 35%. The exclusion time to reject masses from repetitive MS/MS fragmentation was set to 60 sec and the minimal ion signal for MS/MS was 2,000.

Raw MS data were processed using the Refiner MS 7.5 and Analyst 7.5 module (Genedata, Basel, Switzerland). MASCOT (in-house Mascot server v2.3.2, Matrix Science, London, GB) search algorithm was used to match the generated peak lists with a human FASTA-formatted database containing 20,268 unique sequence entries (reviewed human database, release of Oct/2011). Database searches were performed with carbamidomethyl (Cys) as fixed modification and oxidation (Met) as variable modification. Enzyme specificity was selected to trypsin with up to two missed cleavages allowed using 10 ppm MS tolerance and 0.6 Da MS/MS tolerances. We accepted only ranked 1 peptide hits with a Mascot ion score  $>23$  as identified.

Prior to analyses, all peptide intensity values were median-median normalized. Association analyses with serum IGF-I and IGFBP-3 levels were performed by linear regression using the serum levels as outcomes, and including the peptide intensity, sex, age and the MS processing batch as exposures. Associations of a SNP with the peptides were conducted by linear regression using the SNP, sex, age and the first four principal components of a peptide level based principal component analysis as independent variables. Protein intensities used for analyses were obtained by averaging the corresponding peptide intensities that passed the QC filter, and were put instead of the peptide intensities into the association model.

All measured peptides that passed QC of proteins that were encoded by genes located in a 500kb vicinity of our lead SNPs were selected for association analyses. The assignment of protein names (uniprot identifiers) to the corresponding genes was performed using the DAVID gene conversion tool (<http://david.abcc.ncifcrf.gov/>). Finally, for the following proteins peptide intensities measured in 197 SHIP-TREND samples were available for analyses after QC: ALS, CC121, IBP3 and RT34.

#### ***Lookups of Top Loci in Association with metabolites and IGF correlated Traits***

***Serum metabolites:*** publicly available data database of the Metabolomics GWAS Server (<http://www.gwas.eu>) (Suhre *et al.* 2011; Shin *et al.* 2014).

***Anthropometric traits:*** publically available data of the GIANT Consortium ([http://www.broadinstitute.org/collaboration/giant/index.php/Data\\_Release](http://www.broadinstitute.org/collaboration/giant/index.php/Data_Release)). (Heid *et al.* 2010; Lango Allen *et al.* 2010; Speliotes *et al.* 2010) Results for fat percentage were obtained from a GWAS of fat percentage provided by Ruth Loos *et al.*



**Bone mineral density:** publicly available data of the GEFOS Consortium (<http://www.gefos.org/?q=content/data-release>). (Estrada *et al.* 2012)

**Type 2 diabetes:** publicly available data of the DIAGRAM Consortium (<http://diagram-consortium.org/downloads.html>). (Voight *et al.* 2010; Morris *et al.* 2012)

**Diabetes related traits:** publicly available data of the MAGIC Consortium (<http://www.magicinvestigators.org/downloads/>). (Dupuis *et al.* 2010; Saxena *et al.* 2010; Soranzo *et al.* 2010)

**Coronary artery disease:** publicly available data of the CARDIoGRAMplusC4D Consortium (<http://www.cardiogramplusc4d.org/downloads/>). (Coronary Artery Disease Genetics 2011; Schunkert *et al.* 2011; Consortium *et al.* 2013)

**Survival beyond age 90 years old:** results were obtained from a GWAS of longevity providing by Linda Broer *et al.* (Broer *et al.* 2014).

## Supplementary Figures

### ***Supplementary Figure 1: Manhattan Plots of Men and Women Strata***

Manhattan plots of the combined stage 1 and 2 meta-analysis results of IGF-I and IGFBP-3 traits in men and women strata. SNPs are plotted on the x-axis according to their position on each chromosome with the  $-\log_{10}$  association p-value on the y-axis. The upper solid horizontal line indicates the threshold for genome-wide significance. Known hits are colored in orange, new findings in blue. Plots are truncated on the y-axis to 20.

IGF-I women

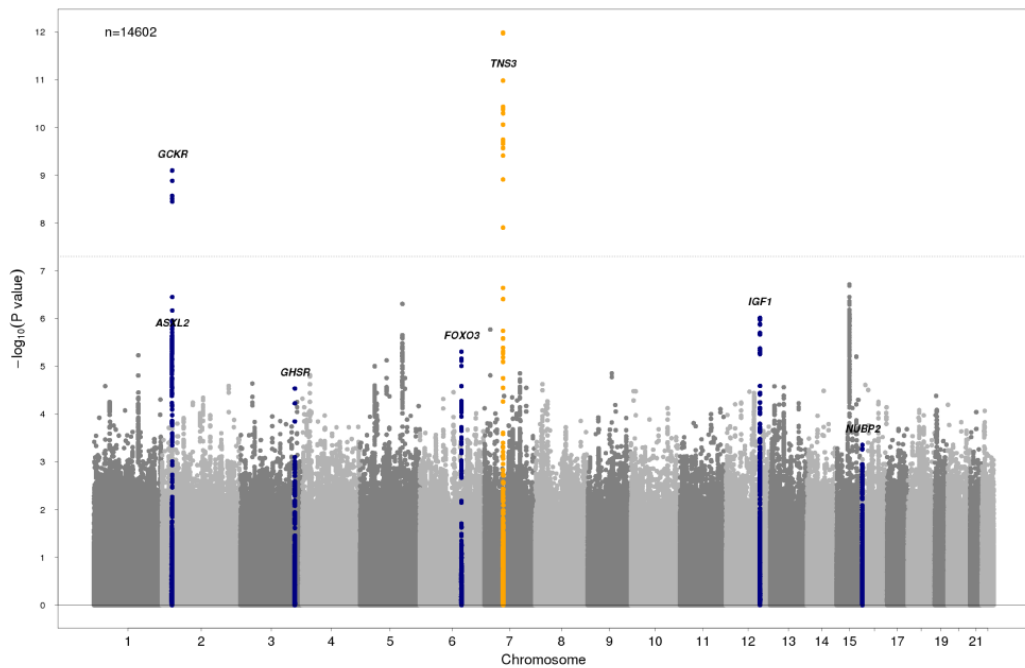

IGFBP-3 women

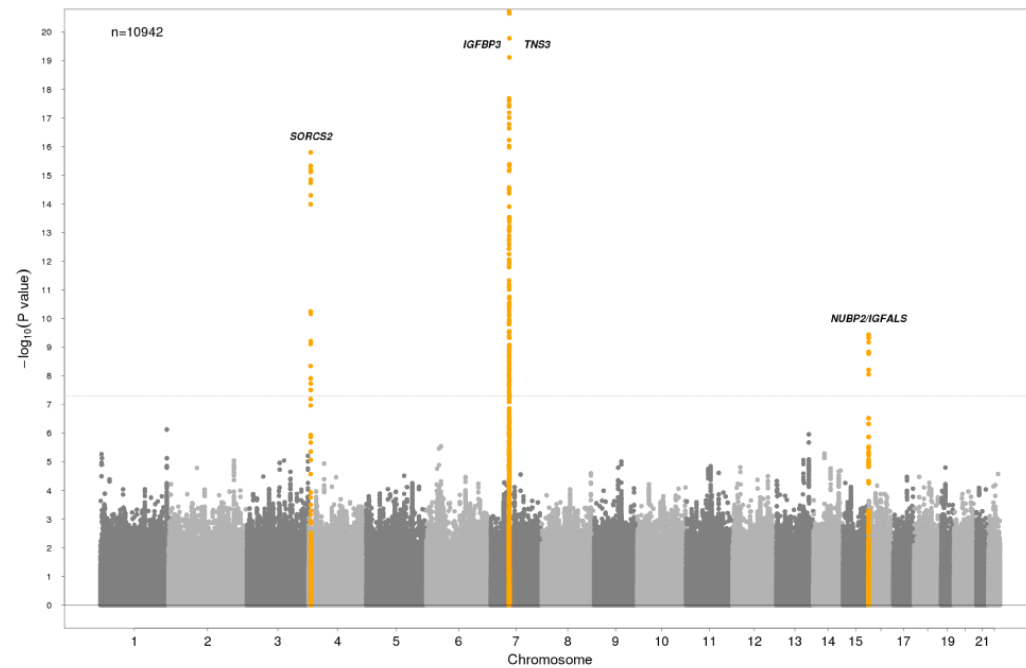

IGF-I men

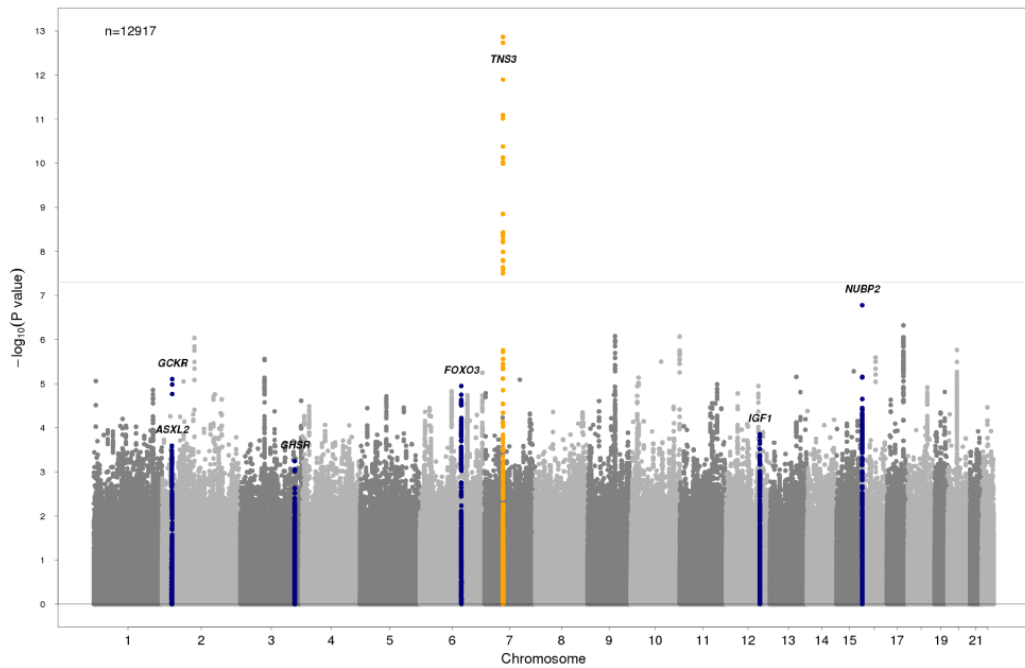

IGFBP-3 men

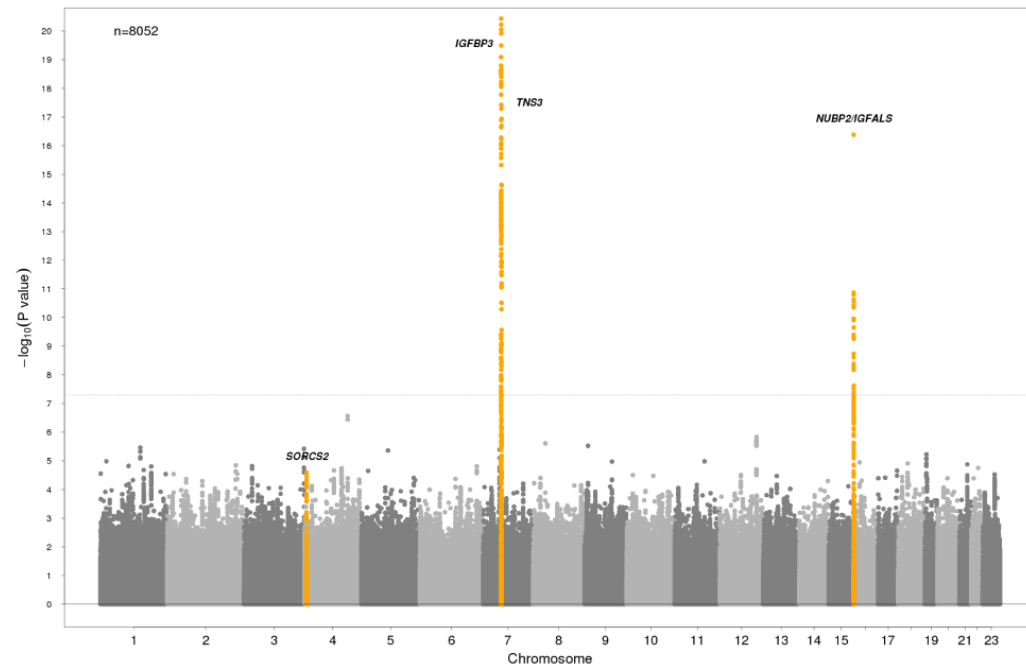

## Supplementary Figure 2: QQ Plots of Meta-Analysis Results

Quantile-quantile plots of the combined stage 1 and 2 meta-analysis results of the IGF-I and IGFBP-3 traits across all strata. The observed p-values are plotted on the y-axis against the expected p-values under no association on the x-axis.

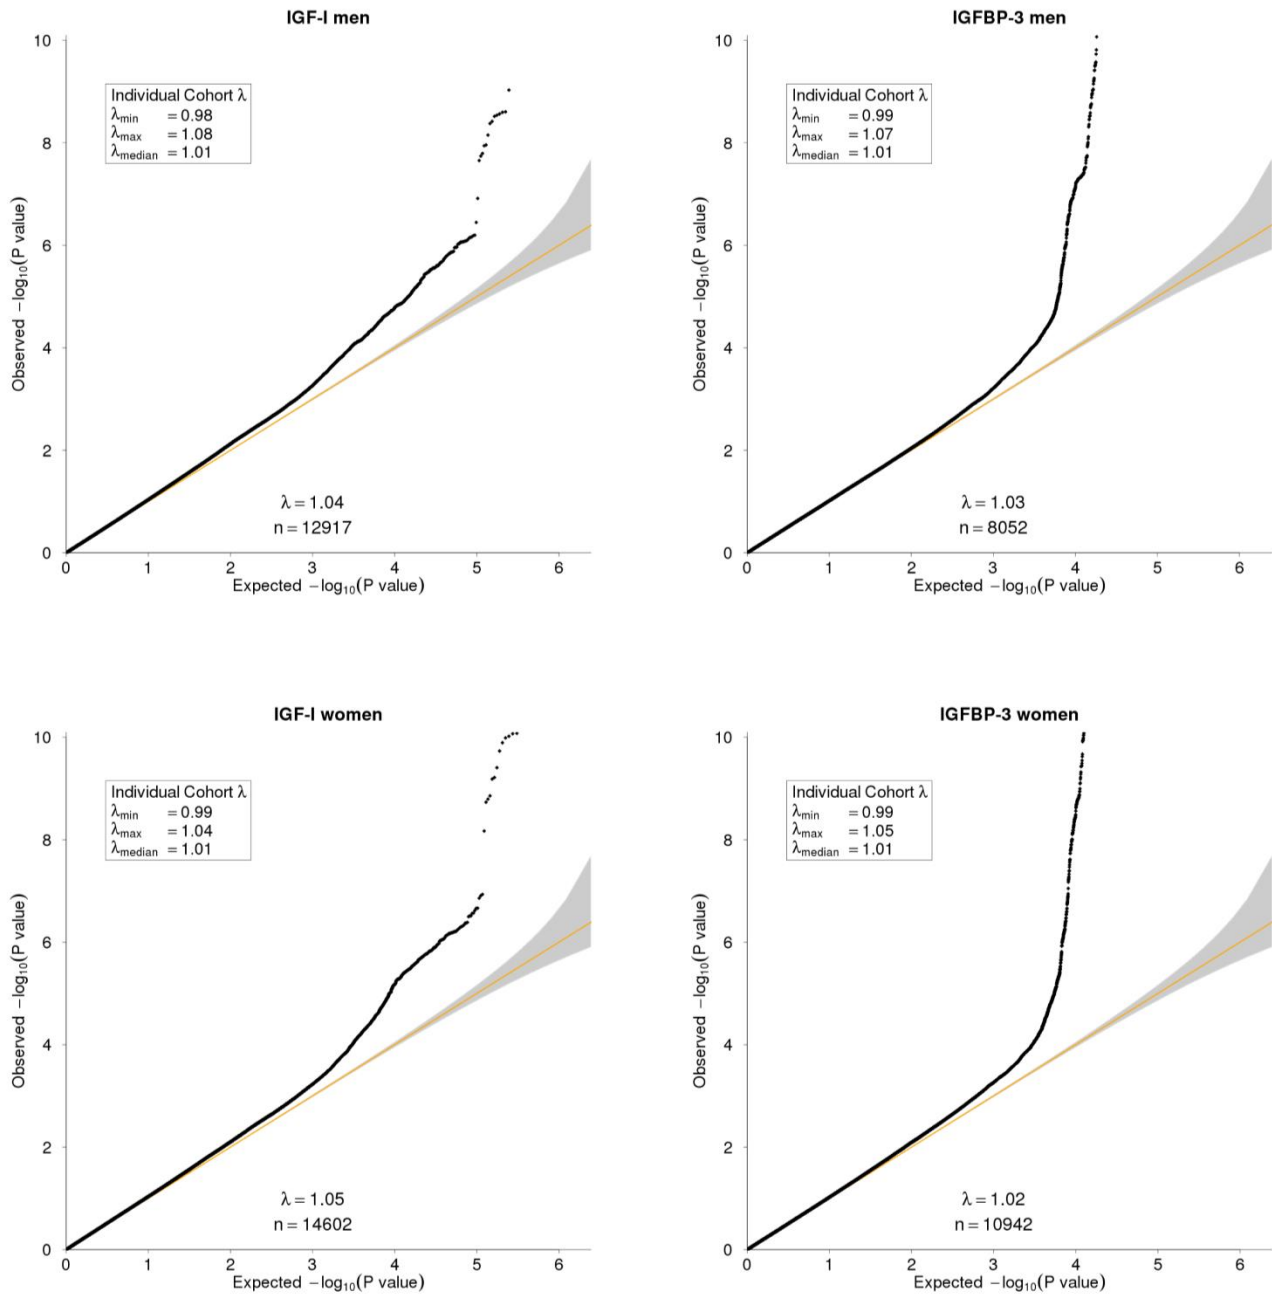

***Supplementary Figure 3: Regional Association Plots for IGF-I Traits***

Regional association plots of all genome-wide significantly associated SNPs with IGF-I as outcome after final stage. The  $-\log_{10}$  association p-values of all SNPs in a 500kb vicinity are shown on the y-axis. The color corresponds to the correlation with the lead SNP based on the HapMap II CEU data. Plots are ordered by association p-value of the lead SNP.

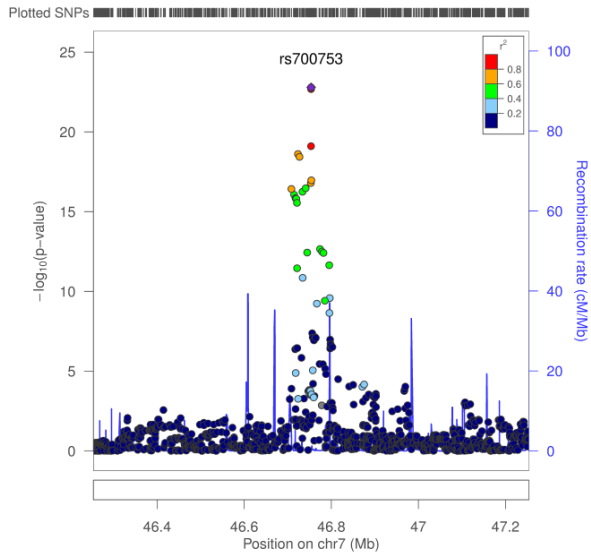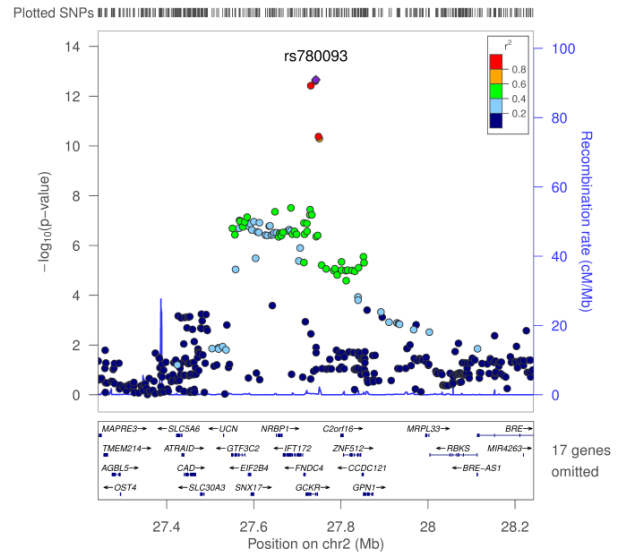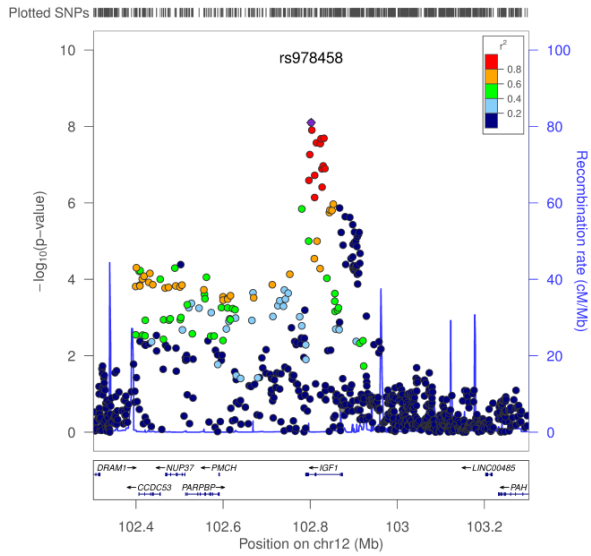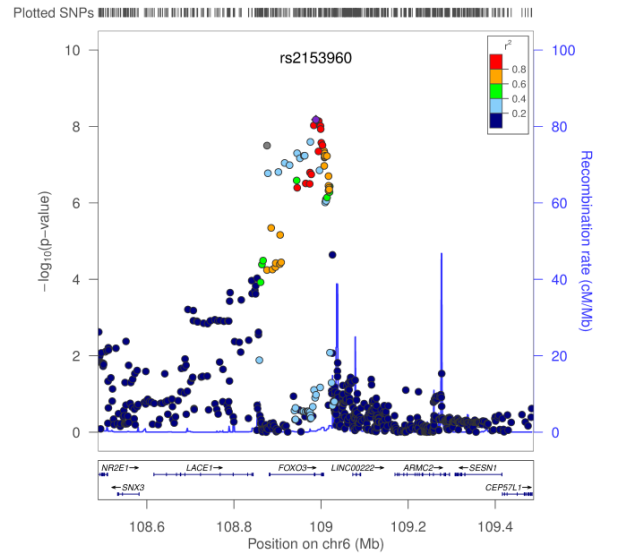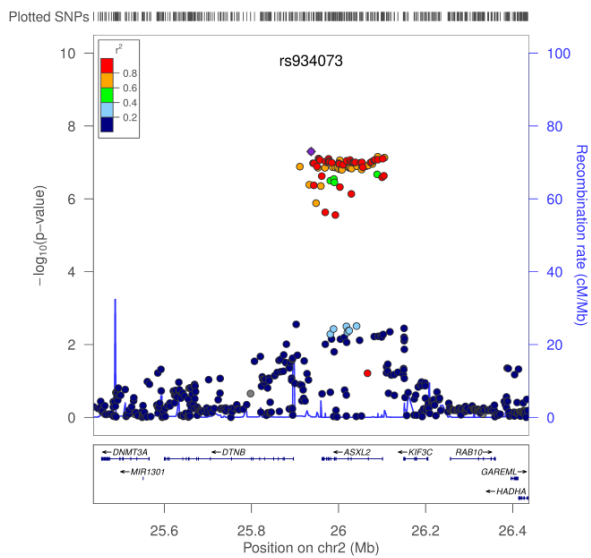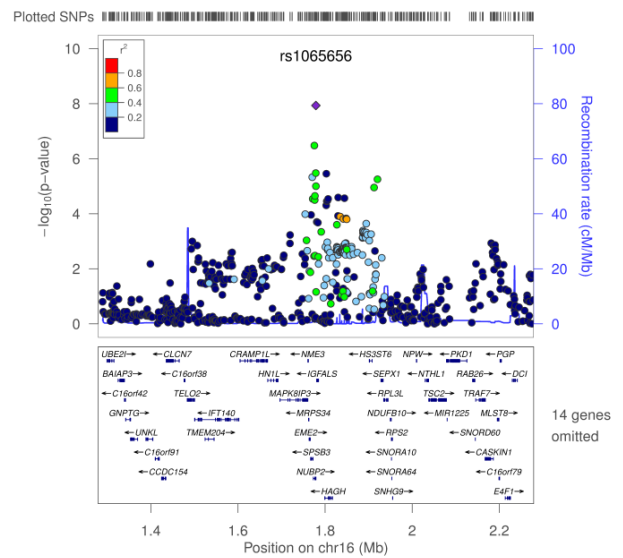

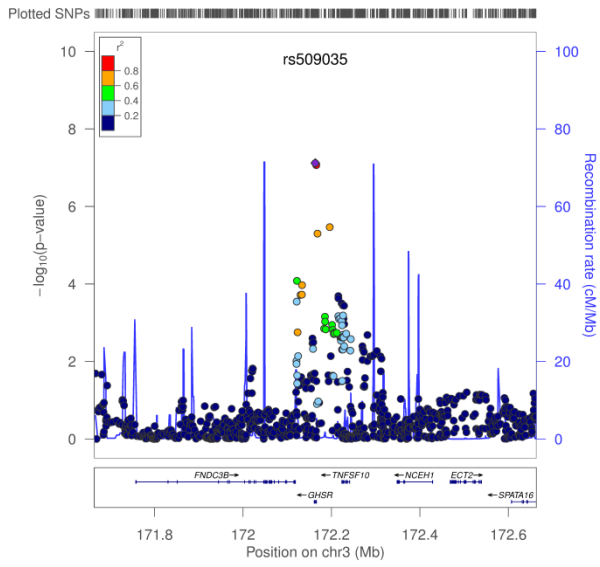

### Supplementary Figure 4: Regional Association Plots for IGFBP-3 Traits

Regional association plots of all genome-wide significantly associated SNPs with IGFBP-3 as outcome after final stage. The  $-\log_{10}$  association p-values of all SNPs in a 500kb vicinity are shown on the y-axis. The color corresponds to the correlation with the lead SNP based on the HapMap II CEU data. Plots are ordered by association p-value of the lead SNP.

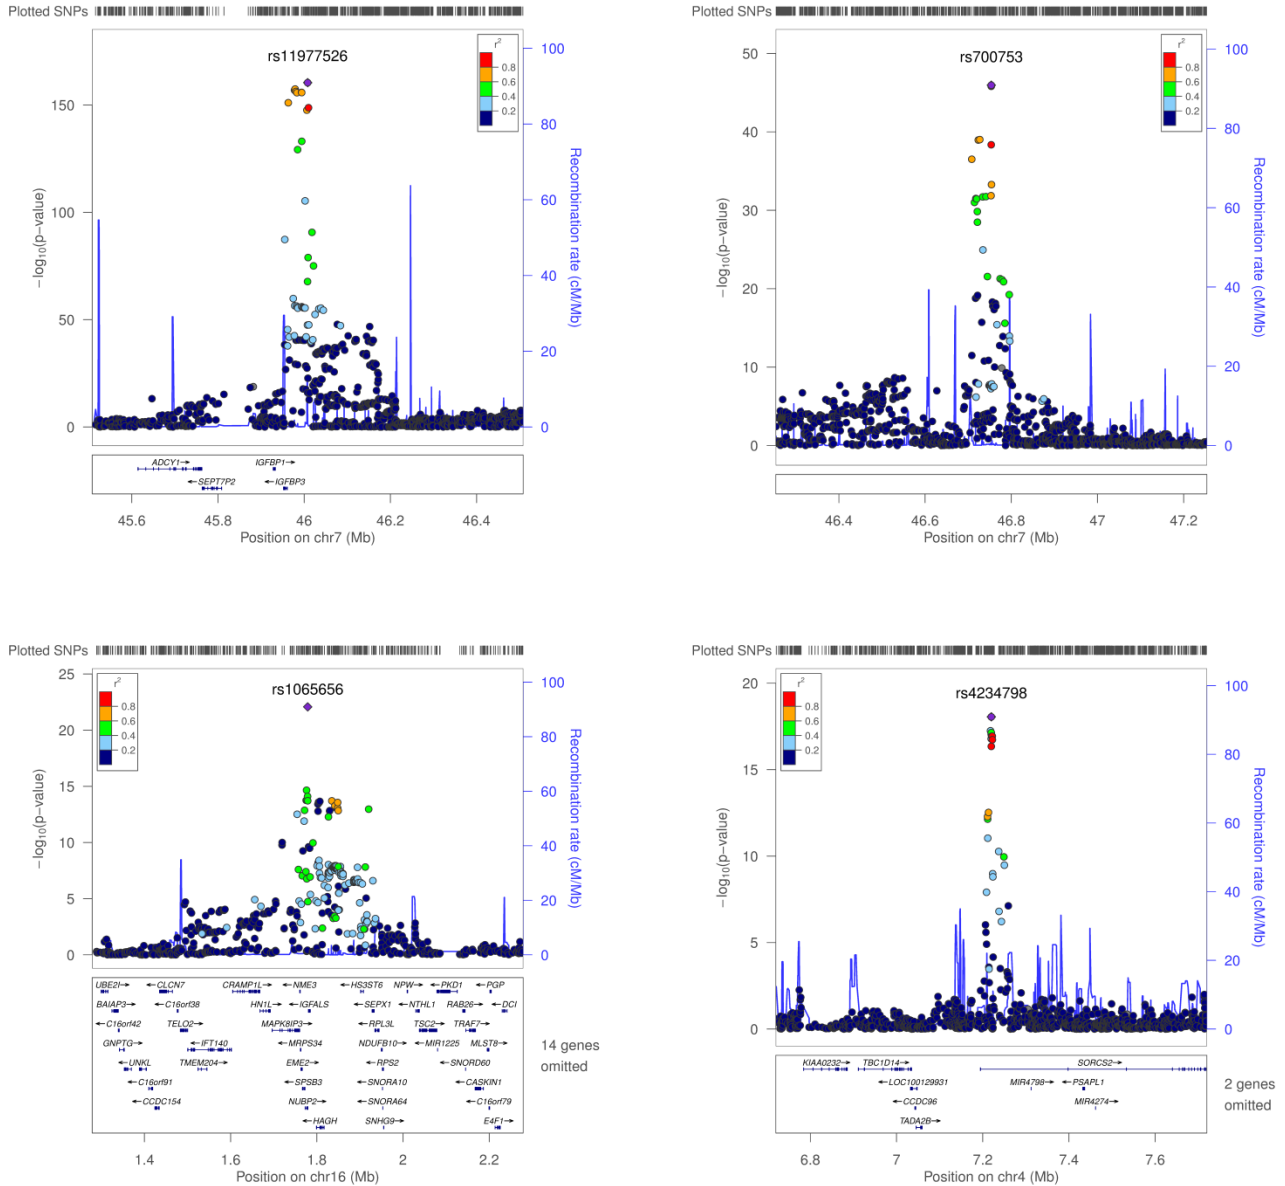



***Supplementary Figure 5: Results of Bivariate Analysis of IGF-I and IGFBP-3***

Manhattan plot (upper panel) and quantile-quantile plot (lower panel) of the genome-wide bivariate analysis on IGF-I and IGFBP-3. In the Manhattan plot, SNPs are plotted on the x-axis according to their position on each chromosome with the  $-\log_{10}$  association p-value on the y-axis. The upper solid horizontal line indicates the threshold for genome-wide significance. Genome-wide significant loci are colored in blue. The plot is truncated on the y-axis to 20. The quantile-quantile plot shows the observed p-values on the y-axis against the expected p-values under no association on the x-axis.

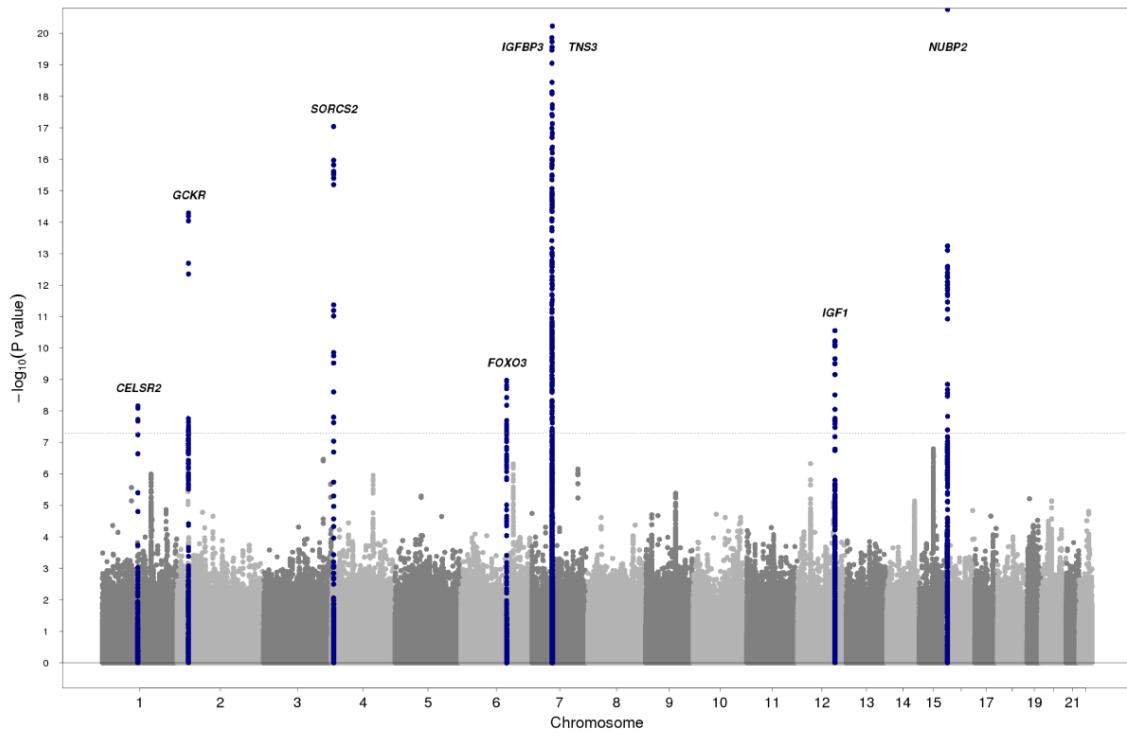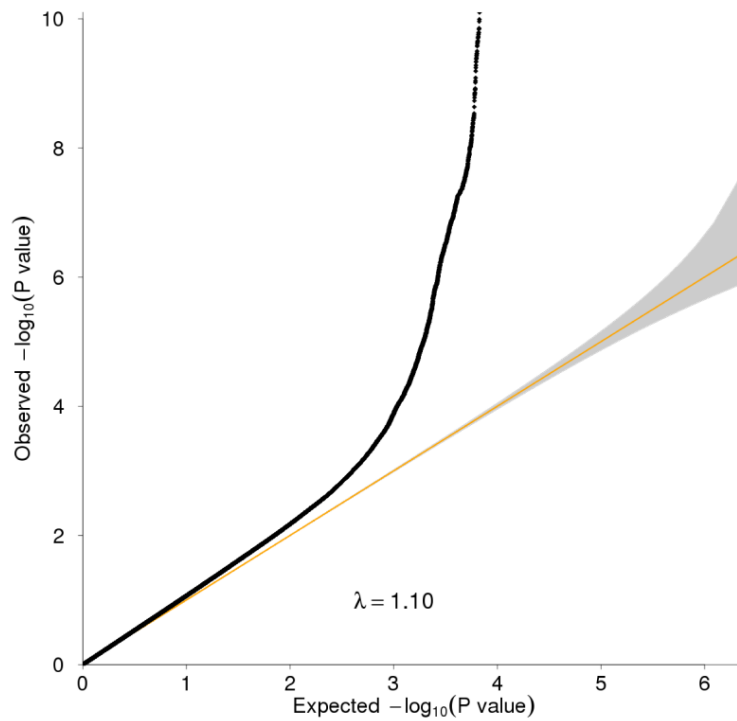

**Supplementary Figure 6: Flow chart of the study's design.**

Loci significantly associated with circulating IGF-I and IGFBP-3 concentrations at each analysis stage.

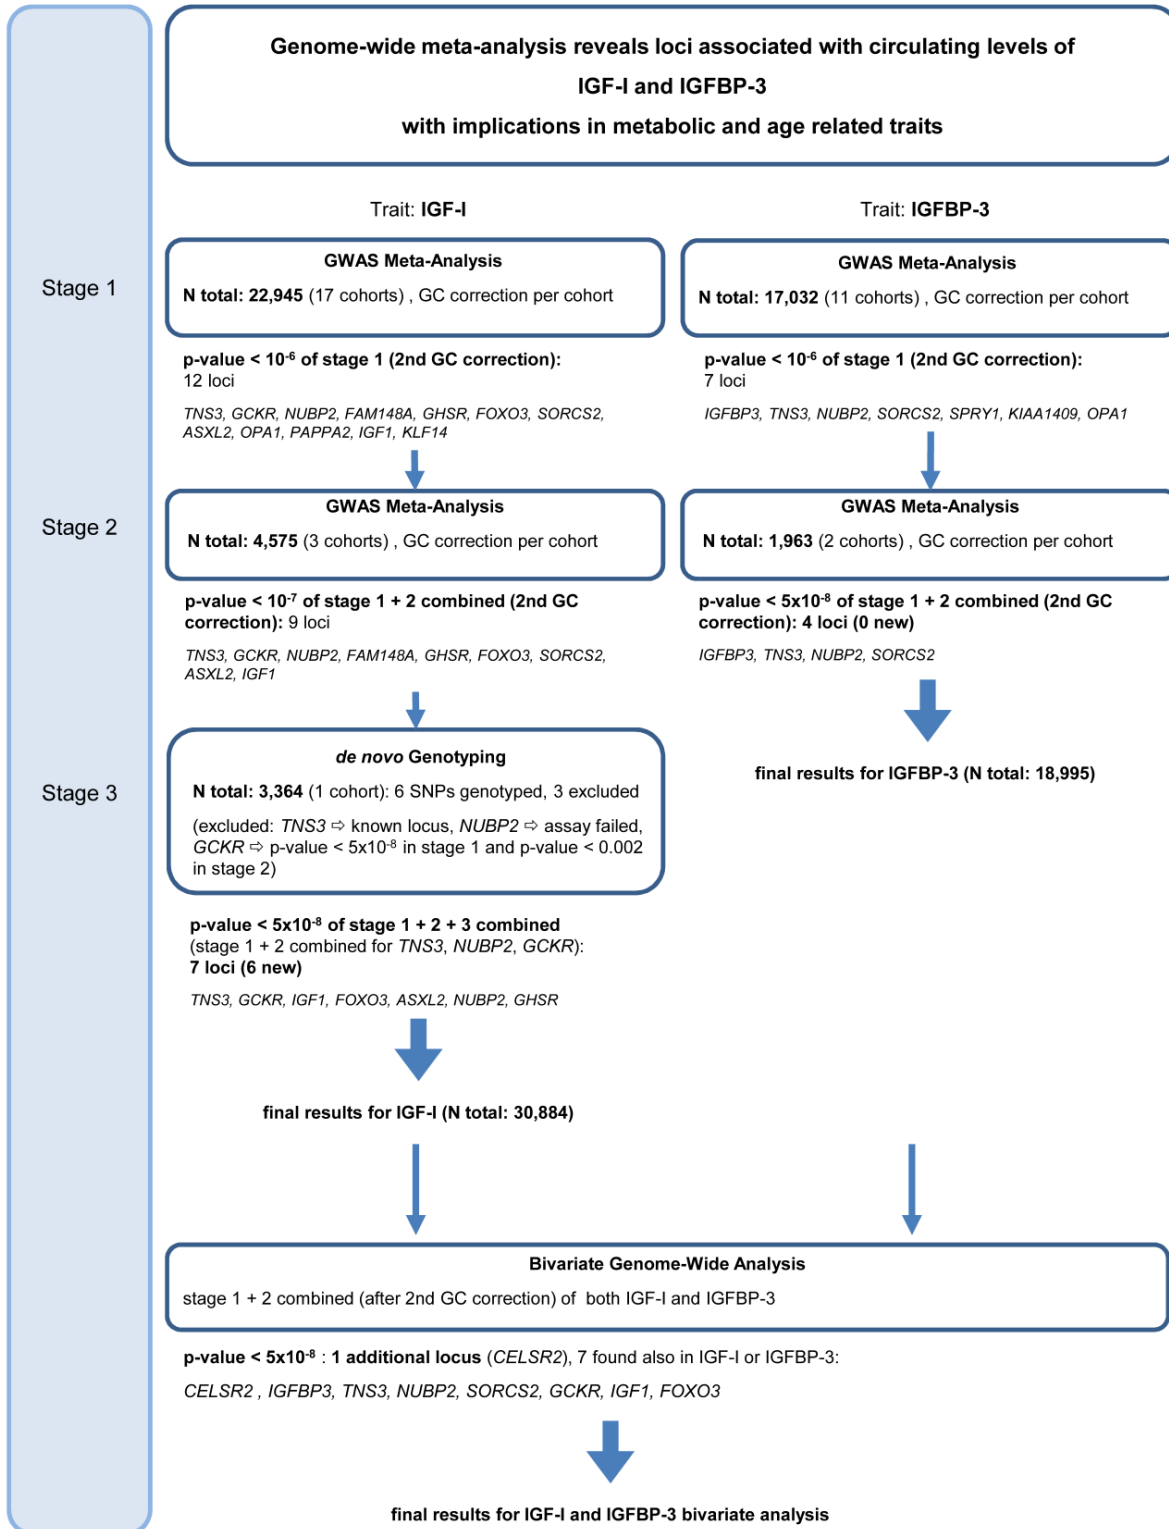

## Supplementary Tables

**Supplementary Table 1: Characteristics of study cohorts**

| Study       | Stage | N IGF-I | N IGFBP-3 | % Male | Mean Age | IGF-I [ng/ml], median (IQR) or mean± SD | IGFBP-3 [ng/ml], median (IQR) or mean± SD | Study Region    | Reference, cohort study design                                                                                                     |
|-------------|-------|---------|-----------|--------|----------|-----------------------------------------|-------------------------------------------|-----------------|------------------------------------------------------------------------------------------------------------------------------------|
| BLSA        | 1     | 516     | - 0 -     | 55     | 68       | 120 (90, 153)                           | NA                                        | USA             | Shock, N.W., et al., Normal Human Aging: The Baltimore Study of Aging. 1984                                                        |
| CHS*        | 1 / 2 | 2615*   | 2815*     | 39     | 76       | 153.3 (115.9, 195.9)                    | 3846 (3261, 4474)                         | USA             | Fried, LP et al, Ann Epidemiol 1991 Feb;1(3):263-76 PMID: 1669507                                                                  |
| FHS         | 1     | 3600    | 3600      | 47     | 40       | 123.53 (100.60, 151.10)                 | 2907.57 (2238.38, 3761.41)                | USA             | Dawber et al, Am J Public Health Nations Health 1951;41:279-81.                                                                    |
| GOOD        | 1     | 938     | - 0 -     | 100    | 18.9     | 253.2 (215.7, 305.9)                    | NA                                        | Sweden          | [PMID: 16007330] Lorentzon et al. 2005. J Bone Miner Res 20, 1334-1341.                                                            |
| HABC        | 1     | 339     | 88        | 53     | 74       | 111 (86, 138)                           | 3436 (2925, 4088)                         | USA             | Cesari M et al. Am J Cardiol , 2003, 92, 522–528. PMID:12943870                                                                    |
| InCHIANTI   | 1     | 1172    | - 0 -     | 43     | 68       | 119.1 (83.9, 163.3)                     | NA                                        | Italy           | Ferrucci L et al, J Am Geriatr Soc. 2000 Dec;48(12):1618-25 PMID: 11129752                                                         |
| KORA        | 1     | 1671    | 1655      | 48     | 60       | 128.0 (101.0, 157.0)                    | 3405 (2870, 3972)                         | Germany         | Wichmann et al, Gesundheitswesen 2005;67:26-30                                                                                     |
| LLS         | 1     | 1910    | 1910      | 45     | 59       | 131.58 ± 37.5                           | 4400 ± 900                                | The Netherlands | Westendorp et al. 2009 J Am Geriatr Soc. Sep;57(9):1634-7 doi: 10.1111/j.1532-5415.2009.02381.x                                    |
| MICROS      | 1     | 1189    | - 0 -     | 47     | 46       | 149.0 (84)                              | NA                                        | Italy           | Pattaro el al (2007), BMC Med Gen 5, 8-29                                                                                          |
| MrOS Sweden | 1     | 941     | - 0 -     | 100    | 75       | 113.1 (85.2, 145.8)                     | NA                                        | Sweden          | [PMID: 16598372] Mellström et al. 2006 J Bone Miner Res 21, 529-535.                                                               |
| NHS.CGEM    | 1     | 1240    | 1239      | 0      | 57       | 148.0 (115.0, 191.4)                    | 4531.7 (3832.95, 5279.37)                 | USA             | Hankinson SE et al. Lancet 1998;351: 1393-6.                                                                                       |
| NHS.CHD     | 1     | 549     | 549       | 0      | 60       | see above                               | see above                                 | USA             | Hart JE et al. Circulation 2014: 130(17):1474-82. PMID: 25332277                                                                   |
| NHS.T2D     | 1     | 1032    | 1032      | 0      | 56       | see above                               | see above                                 | USA             | Rajpathak SN et al, Diabetes 2012;61:2248-54.                                                                                      |
| PLCO        | 1     | 1080    | 1079      | 100    | 64       | 193.9 (145.7, 256.4)                    | 4526.4 (3831.3, 5236.8)                   | USA             | Weiss JM et al. Int J Cancer 2007; Prorok et al. Control Clin Trials 200; Hayes et al. Mutat Res 2005;Yeager et al. Nat Genet 2007 |

|            |   |      |       |    |    |                          |                            |                 |                                                                                                  |
|------------|---|------|-------|----|----|--------------------------|----------------------------|-----------------|--------------------------------------------------------------------------------------------------|
| RS         | 1 | 158  | 158   | 49 | 67 | 136.17                   | 3818.8 (914.7)             | The Netherlands | Hofman et al, Eur J Epidemiol 7, 403-22 (1991); Hofman et al, Eur J Epidemiol 28, 889-926 (2013) |
| SHIP       | 1 | 3889 | 3889  | 49 | 50 | 133.4<br>(101.9, 170.8)  | 1892.6<br>(1565.6, 2202.4) | Germany         | Völzke et al, Int J Epidemiology                                                                 |
| SORBS      | 1 | 932  | - 0 - | 59 | 48 |                          | NA                         | Germany         | PMID:21559053; PMID:22907691                                                                     |
| FHS.G2E7   | 2 | 2768 | - 0 - | 45 | 61 | 144.6 ± 60               | NA                         | USA             | Neurology 2014;82:1613–1619                                                                      |
| SHIP-Trend | 2 | 981  | 981   | 44 | 50 | 138.5 (110.3 -<br>173.7) | 4188 (3568 - 4825)         | Germany         | Völzke et al, Int J Epidemiology                                                                 |
| Health2006 | 3 | 3364 | - 0 - | 55 | 49 | 150 (116 - 189)          | NA                         | Denmark         | Thuesen et al, Int J Epidemiol 2014 Apr;43(2):568-75                                             |

Stage 1, discovery stage; Stage 2, replication stage; Stage 3, de novo genotyping stage

\* CHS study: for IGF-I, N=1789 stage-1 and N= 826 stage-2, and for IGFBP-3, N=1833 stage-1 and N=982 stage-2.

**Supplementary Table 2: Assay and genotyping information of study cohorts**

| Study     | Specimen type        | IGF-I assay                                                                                                                                                                | IGFBP-3 assay                                                                                                                                                                   | Genotyping array type                    | Genotype calling    | Genotype imputation |
|-----------|----------------------|----------------------------------------------------------------------------------------------------------------------------------------------------------------------------|---------------------------------------------------------------------------------------------------------------------------------------------------------------------------------|------------------------------------------|---------------------|---------------------|
| BLSA      | Fasting, serum       | Automated enzymatic chemiluminescent assay, Pacific Biomarkers, Seattle, WA, USA                                                                                           | N/A                                                                                                                                                                             | Illumina 550K                            | Beadstudio          | MACH                |
| CHS       | Fasting, plasma      | Stage 1: ELISA, Immunodiagnostic Systems Ltd/IDS, Boldon Business Park, Boldon, Tyne & Wear, England. Stage 2: ELISA, Diagnostics Systems Laboratory/DSL, Webster, TX, USA | Stage 1: Sandwich chemiluminescence assay, Immunodiagnostic Systems Ltd/IDS, Boldon, Tyne & Wear, England. Stage 2: ELISA, Diagnostics Systems Laboratory/DSL, Webster, TX, USA | Illumina 370CNV                          | Illumina BeadStudio | BIMBAM10 v0.99      |
| FHS       | Fasting, serum       | ELISA, Human IGF-1 Immunoassay DG100, R&D Systems                                                                                                                          | ELISA, Human IGFBP-3 Immunoassay DGB300, R&D Systems                                                                                                                            | Affymetrix 550K                          | BRLMM               | MACH                |
| GOOD      | Non-fasting, serum   | Double-antibody IGF-binding protein-blocked RIA, Mediagnost, Tubingen, Germany                                                                                             | N/A                                                                                                                                                                             | Illumina HumanHap 610K                   | BeadStudio          | MACH                |
| HABC      | Fasting, serum       | IGF-binding protein-blocked radioimmunoassay, ALPCO, Windham, NH, USA                                                                                                      | Coated tube immunoradiometric (IRMA) kit, Diagnostic Systems Laboratory, Webster, TX), USA                                                                                      | Illumina Human1M-Duo                     | BeadStudio          | MACH version 2.0.16 |
| InCHIANTI | Fasting, serum       | Immunoradiometric assay, Diagnostic System Laboratories, Milan, Italy.                                                                                                     | N/A                                                                                                                                                                             | Illumina 550K                            | Beadstudio          | MACH                |
| KORA      | Fasting, EDTA plasma | Chemiluminescent immunometric assay, Immulite 2000, Siemens                                                                                                                | Chemiluminescent immunometric assay, Siemens Immulite 2500                                                                                                                      | Affymetrix 6.0                           | Birdseed2           | IMPUTE v0.4.2       |
| LLS       | Non-fasting, serum   | Immulite 2500, DPC, Los Angeles, CA, USA                                                                                                                                   | Immulite 2500, DPC, Los Angeles, CA, USA                                                                                                                                        | Illumina 660W-Quad, Illumina OmniExpress | GenomeStudio        | IMPUTE v2           |
| MICROS    | Fasting, serum       | Chemiluminescent immunometric assay IMMULITE® 2000 analyzer, Siemens                                                                                                       | N/A                                                                                                                                                                             | Illumina HumHap300                       | Bead Studio         | MACH v.1.016        |

|             |                                         |                                                                                            |                                                                                            |                                                                             |                      |                 |
|-------------|-----------------------------------------|--------------------------------------------------------------------------------------------|--------------------------------------------------------------------------------------------|-----------------------------------------------------------------------------|----------------------|-----------------|
| MrOS Sweden | Fasting, serum                          | Double-antibody IGF-binding protein-blocked RIA, Mediagnost, Tubingen, Germany             | N/A                                                                                        | Illumina Human1M-Duo/Illumina HumanOmni1-Quad                               | BeadStudio           | MACH, minicmac  |
| NHS.CGEM    | 64.4% fasting, 35.6% nonfasting, plasma | Enzyme-linked immunosorbent assay (ELISA), DSL, Webster, TX, USA                           | N/A                                                                                        | Affymetrix 6.0                                                              | Birdseed             | MACH            |
| NHS.CHD     | 62.7% fasting, 37.3% nonfasting, plasma | ELISA, Diagnostic Systems Laboratory/DSL, Webster, TX, USA                                 | N/A                                                                                        | Affymetrix 6.0                                                              | Birdseed             | MACH            |
| NHS.T2D     | 94.7% fasting, 5.3% nonfasting, plasma  | ELISA, Diagnostic Systems Laboratory/DSL, Webster, TX, USA                                 | N/A                                                                                        | Illumina 550K                                                               | Birdseed             | MACH            |
| PLCO        | Nonfasting blood (serum)                | ELISA, Diagnostic Systems Laboratory/DSL, Webster, TX, USA                                 | ELISA, Diagnostic Systems Laboratory/DSL, Webster, TX, USA                                 | Illumina 240K+310K                                                          | Illumina Bead studio | MACH            |
| RS          | Fasting, serum                          | RIA, Medgenix Diagnosticss, Fleurus, Belgium                                               | RIA, Medgenix Diagnosticss, Fleurus, Belgium                                               | Illumina 550 and 610K                                                       | Beadstudio           | MACH            |
| SHIP        | Non-fasting, serum                      | Automated two-site chemiluminescence immunoassay, Nichols Advantage                        | Automated two-site chemiluminescence immunoassay, Nichols Advantage                        | Affymetrix Genome-Wide SNP 6.0                                              | Birdseed V2          | IMPUTE v0.5.0   |
| SORBS       | Non-fasting, serum                      | Chemiluminescent immuno assay, Liasion, DiaSorin                                           | N/A                                                                                        | Affymetrix 500K und Affymetrix 6.0                                          |                      | IMPUTE          |
| FHS.G2E7    | Fasting, serum                          | Quantikine Human IGF-I DG100, SG100, and PDG100, R&D Systems, Minneapolis, MN, USA         | N/A                                                                                        | Affymetrix GeneChipR Human Mapping 500K Array, 50K Human Gene Focused Panel | BRLMM                | MACH            |
| SHIP-Trend  | Non-fasting, serum                      | Chemiluminescent immunometric assay, Immulite 2500, Siemens Healthcare Medical Diagnostics | Chemiluminescent immunometric assay, Immulite 2500, Siemens Healthcare Medical Diagnostics | Illumina Human Omni 2.5                                                     | GenCall              | IMPUTE v2.1.2.3 |
| Health2006  | Fasting serum                           | Immulite 2000 IGF-1 assay, Siemens Medical Solutions Diagnostics, Los Angeles, CA, USA     | N/A                                                                                        | N/A (replication de novo genotyping)                                        | N/A                  | N/A             |

**Supplementary Table 3: GWAS results with  $p$ -value  $< 10^{-6}$  in stage 1**

| Trait   | SNP        | Nearest Gene  | Effect Allele | Other Allele | Effect Allele Frequency | N total stage 1 | p-value stage1   | N total stage 1+2 | p-value stage 1+2 | N total stage 1+2+3 | p-value stage 1+2+3 | p-value stage 2 | N total stage 2 | Median imputation quality | selected form <i>de novo</i> replication |
|---------|------------|---------------|---------------|--------------|-------------------------|-----------------|------------------|-------------------|-------------------|---------------------|---------------------|-----------------|-----------------|---------------------------|------------------------------------------|
| IGF-I   | rs700753   | <b>TNS3</b>   | c             | g            | 0.35                    | 22927           | <b>3.70E-19</b>  | 27502             | <b>1.60E-23</b>   |                     |                     | <b>1.59E-06</b> | 4575            | 1.00                      | no - known locus                         |
| IGF-I   | rs780093   | GCKR          | t             | c            | 0.41                    | 22943           | <b>1.02E-09</b>  | 27518             | <b>2.19E-13</b>   |                     |                     | <b>4.76E-06</b> | 4575            | 1.00                      | no - significant in stage 2              |
| IGF-I   | rs1065656  | NUBP2         | c             | g            | 0.31                    | 22942           | <b>2.23E-08</b>  | 27517             | <b>1.17E-08</b>   |                     |                     | 1.08E-01        | 4575            | 0.91                      | yes, but genotyping failed               |
| IGF-I   | rs17205463 | FAM148A       | t             | c            | 0.44                    | 22942           | 8.47E-08         | 27517             | <b>2.09E-08</b>   | 30876               | 7.88E-08            | 5.90E-02        | 4575            | 1.00                      | yes                                      |
| IGF-I   | rs509035   | GHSR          | a             | g            | 0.31                    | 22942           | 8.79E-08         | 27517             | 7.60E-08          | 30872               | <b>2.09E-08</b>     | 1.78E-01        | 4575            | 1.00                      | yes                                      |
| IGF-I   | rs2153960* | FOXO3**       | a             | g            | 0.69                    | 22915           | 2.87E-07         | 27518             | <b>6.63E-09</b>   | 30882               | <b>5.16E-09</b>     | 3.40E-03        | 4575            | 0.99                      | yes                                      |
| IGF-I   | rs4234798  | SORCS2        | t             | g            | 0.39                    | 22941           | 6.50E-07         | 27516             | 8.38E-08          | 30870               | 1.75E-07            | 3.13E-02        | 4575            | 1.00                      | yes                                      |
| IGF-I   | rs934073   | ASXL2         | c             | g            | 0.71                    | 22944           | 7.82E-07         | 27519             | 5.03E-08          | 30867               | <b>6.48E-09</b>     | 1.34E-02        | 4575            | 0.97                      | yes                                      |
| IGF-I   | rs2630239  | OPA1          | t             | c            | 0.79                    | 22944           | 8.06E-07         | 27519             | 5.16E-05          |                     |                     | 2.76E-01        | 4575            | 0.88                      | no - $p > 1E-7$                          |
| IGF-I   | rs10489477 | PAPPA2        | t             | c            | 0.15                    | 22943           | 8.43E-07         | 27518             | 1.05E-07          |                     |                     | 2.93E-02        | 4575            | 0.99                      | no - $p > 1E-7$                          |
| IGF-I   | rs978458   | IGF1          | t             | c            | 0.26                    | 22926           | 8.95E-07         | 27501             | <b>7.92E-09</b>   | 30856               | <b>1.56E-10</b>     | <b>8.00E-04</b> | 4575            | 1.00                      | yes                                      |
| IGF-I   | rs157931   | KLF14         | t             | c            | 0.30                    | 22920           | 9.68E-07         | 27495             | 2.32E-07          |                     |                     | 6.03E-02        | 4575            | 1.00                      | no - $p > 1E-7$                          |
| IGFBP-3 | rs11977526 | <b>IGFBP3</b> | a             | g            | 0.41                    | 17028           | <b>5.98E-152</b> | 18991             | <b>4.16E-161</b>  |                     |                     | <b>4.60E-12</b> | 1963            | 0.96                      | no - known locus                         |
| IGFBP-3 | rs700753   | <b>TNS3</b>   | c             | g            | 0.35                    | 17014           | <b>4.52E-41</b>  | 18977             | <b>1.11E-46</b>   |                     |                     | <b>1.87E-07</b> | 1963            | 1.00                      | no - known locus                         |
| IGFBP-3 | rs1065656  | <b>NUBP2</b>  | c             | g            | 0.31                    | 17029           | <b>4.73E-21</b>  | 18992             | <b>8.55E-23</b>   |                     |                     | 3.78E-03        | 1963            | 0.93                      | no - known locus                         |
| IGFBP-3 | rs4234798  | <b>SORCS2</b> | t             | g            | 0.39                    | 17028           | <b>3.05E-17</b>  | 18991             | <b>8.86E-19</b>   |                     |                     | 6.96E-03        | 1963            | 1.00                      | no - known locus                         |
| IGFBP-3 | rs17007484 | SPRY1         | a             | c            | 0.88                    | 17022           | 1.27E-07         | 18985             | 1.58E-07          |                     |                     | 4.43E-01        | 1963            | 0.99                      | no - $p > 1E-7$                          |
| IGFBP-3 | rs943318   | KIAA1409      | a             | g            | 0.67                    | 17030           | 4.10E-07         | 18993             | 6.50E-07          |                     |                     | 5.69E-01        | 1963            | 0.96                      | no - $p > 1E-7$                          |
| IGFBP-3 | rs2630239  | OPA1          | t             | c            | 0.79                    | 17031           | 6.88E-07         | 18994             | 4.17E-06          |                     |                     | 7.33E-01        | 1963            | 0.89                      | no - $p > 1E-7$                          |

Significant p-values are marked in bold. All p-values except for stage 2 only results are corrected for 2nd genomic control.

\* = lead SNP of locus after stage 1 was rs9480867 (p-value = 2.70E-07)

Genes of known associations are marked in bold (\*\* = suggestive association)



**Supplementary Table 4: Genome-wide significant loci of bivariate analysis**

| SNP        | Effect Allele | Other Allele | Effect Allele Frequency | p-value   | Chr | Position    | Nearest Gene   | Gene Distance |
|------------|---------------|--------------|-------------------------|-----------|-----|-------------|----------------|---------------|
| rs11977526 | a             | g            | 0.41                    | 2.64E-195 | 7   | 45,974,635  | <i>IGFBP3</i>  | 47239         |
| rs700753   | c             | g            | 0.35                    | 6.81E-48  | 7   | 46,720,209  | <i>TNS3</i>    | 561067        |
| rs1065656  | c             | g            | 0.31                    | 1.76E-21  | 16  | 1,778,837   | <i>NUBP2</i>   | 0             |
| rs4234798  | t             | g            | 0.38                    | 9.13E-18  | 4   | 7,270,834   | <i>SORCS2</i>  | 0             |
| rs1260326  | t             | c            | 0.42                    | 5.15E-15  | 2   | 27,584,444  | <i>GCKR</i>    | 0             |
| rs2280496* | c             | g            | 0.78                    | 4.26E-12  | 7   | 45,723,522  | <i>ADCY1*</i>  | 0             |
| rs978458   | t             | c            | 0.27                    | 2.80E-11  | 12  | 101,326,369 | <i>IGF1</i>    | 0             |
| rs2153960  | a             | g            | 0.69                    | 1.06E-09  | 6   | 109,094,877 | <i>FOXO3</i>   | 0             |
| rs788777*  | a             | g            | 0.06                    | 1.47E-09  | 7   | 46,114,942  | <i>IGFBP3*</i> | 187546        |
| rs646776   | t             | c            | 0.78                    | 6.87E-09  | 1   | 109,620,053 | <i>CELSR2</i>  | 152           |

\* = IGFBP3 locus

**Supplementary Table 5: Sex interaction results of the 12 genome-wide significant SNPs**

| Trait     | SNP        | Effect Allele | Other Allele | p GxSEX         | Chr | Position    | Nearest Gene | Gene Distance | N (men) | z-score (men) | p (men)  | N (women) | z-score (women) | p (women) |
|-----------|------------|---------------|--------------|-----------------|-----|-------------|--------------|---------------|---------|---------------|----------|-----------|-----------------|-----------|
| IGF-I     | rs700753   | c             | g            | 8.71E-01        | 7   | 46,720,209  | TNS3         | 561067        | 12911   | -7.481        | 7.35E-14 | 14591     | -7.251          | 4.15E-13  |
| IGF-I     | rs780093   | t             | c            | 2.24E-01        | 2   | 27,596,107  | GCKR         | 0             | 12916   | -4.456        | 8.36E-06 | 14601     | -6.176          | 6.56E-10  |
| IGF-I     | rs978458   | t             | c            | 2.20E-01        | 12  | 101,326,369 | IGF1         | 0             | 14413   | 3.652         | 2.61E-04 | 16443     | 5.388           | 7.11E-08  |
| IGF-I     | rs2153960  | a             | g            | 9.72E-01        | 6   | 109,082,339 | FOXO3        | 0             | 14422   | 4.204         | 2.62E-05 | 16459     | 4.254           | 2.10E-05  |
| IGF-I     | rs934073   | c             | g            | 7.53E-01        | 2   | 25,790,669  | ASXL2        | 25087         | 14414   | -3.98         | 6.91E-05 | 16453     | -4.425          | 9.62E-06  |
| IGF-I     | rs1065656  | c             | g            | 1.53E-01        | 16  | 1,778,837   | NUBP2        | 0             | 12917   | -5.291        | 1.21E-07 | 14601     | -3.269          | 1.08E-03  |
| IGF-I     | rs509035   | a             | g            | 6.62E-01        | 3   | 173,646,143 | GHSR         | 0             | 14418   | 3.599         | 3.19E-04 | 16454     | 4.218           | 2.47E-05  |
| IGFBP-3   | rs11977526 | a             | g            | <b>4.96E-05</b> | 7   | 45,974,635  | IGFBP3       | 47239         | 8051    | 16.499        | 3.70E-61 | 10939     | 22.237          | 1.51E-109 |
| IGFBP-3   | rs700753   | c             | g            | 2.74E-02        | 7   | 46,720,209  | TNS3         | 561067        | 8046    | -8.635        | 5.86E-18 | 10931     | -11.754         | 6.72E-32  |
| IGFBP-3   | rs1065656  | c             | g            | 6.24E-02        | 16  | 1,778,837   | NUBP2        | 0             | 8052    | -8.484        | 2.17E-17 | 10941     | -5.849          | 4.95E-09  |
| IGFBP-3   | rs4234798  | t             | g            | <b>3.48E-03</b> | 4   | 7,270,834   | SORCS2       | 0             | 8050    | -4.17         | 3.05E-05 | 10941     | -8.302          | 1.03E-16  |
| Bivariate | rs646776   | t             | c            | 2.42E-01        | 1   | 109,620,053 | CELSR2       | 152           | 7957    | 5.059         | 4.22E-07 | 10832     | 3.464           | 5.32E-04  |

p GxSEX: p-value from SNP-sex-interaction analysis.

Results are shown for the final stage.

Significant p-values after Bonferroni correction ( $p < 0.004$ ) are marked in bold.

**Supplementary Table 6: Results of eQTL lookup in the Muther dataset**

| Illumina Probe | eQTL Gene | eQTL SNP   | Effect Allele | Effect Allele Frequency | Fat beta | Fat SE | Fat p-value     | LCL beta | LCL SE | LCL p-value     | Skin beta | Skin SE | Skin p-value    | GWAS locus |
|----------------|-----------|------------|---------------|-------------------------|----------|--------|-----------------|----------|--------|-----------------|-----------|---------|-----------------|------------|
| ILMN_1772731   | HAGH      | rs1065656  | G             | 0.72                    | -0.106   | 0.015  | <b>3.14E-12</b> | -0.172   | 0.016  | <b>1.98E-26</b> | -0.039    | 0.013   | <b>3.90E-03</b> | NUBP2      |
| ILMN_2379520   | HAGH      | rs1065656  | G             | 0.72                    | -0.092   | 0.016  | <b>6.13E-09</b> | -0.126   | 0.014  | <b>1.78E-20</b> | -0.045    | 0.014   | <b>1.40E-03</b> | NUBP2      |
| ILMN_1694593   | FAHD1     | rs1065656  | G             | 0.72                    | -0.046   | 0.007  | <b>1.05E-11</b> | -0.016   | 0.006  | 4.70E-03        | -0.042    | 0.007   | <b>2.12E-09</b> | NUBP2      |
| ILMN_2246661   | FAHD1     | rs1065656  | G             | 0.72                    | -0.036   | 0.016  | 2.01E-02        | -0.075   | 0.013  | <b>7.98E-09</b> | -0.078    | 0.021   | 2.06E-04        | NUBP2      |
| ILMN_1701457   | FAHD1     | rs1065656  | G             | 0.72                    | -0.063   | 0.014  | <b>1.35E-05</b> | -0.096   | 0.018  | <b>1.31E-07</b> | -0.044    | 0.019   | 1.98E-02        | NUBP2      |
| ILMN_1671843   | PSRC1     | rs646776   | T             | 0.78                    | -0.007   | 0.007  | 3.49E-01        | -0.073   | 0.019  | 1.35E-04        | -0.020    | 0.015   | 1.83E-01        | CELSR2     |
| ILMN_1729225   | SORCS2    | rs4234798  | T             | 0.38                    | 0.008    | 0.005  | 1.25E-01        | -0.006   | 0.005  | 2.51E-01        | 0.031     | 0.009   | 3.62E-04        | SORCS2     |
| ILMN_1762255   | GSTM1     | rs646776   | T             | 0.78                    | 0.165    | 0.056  | 3.20E-03        | 0.251    | 0.073  | 6.26E-04        | 0.090     | 0.035   | 1.10E-02        | CELSR2     |
| ILMN_2356672   | EIF2B4    | rs780093   | T             | 0.39                    | -0.005   | 0.012  | 7.01E-01        | -0.027   | 0.008  | 1.10E-03        | -0.042    | 0.013   | 1.40E-03        | GCKR       |
| ILMN_1745537   | GNAT2     | rs646776   | T             | 0.78                    | -0.003   | 0.006  | 5.84E-01        | 0.026    | 0.008  | 1.70E-03        | -0.010    | 0.006   | 1.30E-01        | CELSR2     |
| ILMN_1711208   | CELSR2    | rs646776   | T             | 0.78                    | -0.008   | 0.006  | 1.76E-01        | 0.003    | 0.006  | 6.48E-01        | -0.084    | 0.028   | 2.40E-03        | CELSR2     |
| ILMN_1687430   | EIF2B4    | rs780093   | T             | 0.39                    | -0.019   | 0.012  | 1.18E-01        | -0.016   | 0.009  | 7.98E-02        | -0.041    | 0.014   | 2.90E-03        | GCKR       |
| ILMN_1746457   | GTF3C2    | rs780093   | T             | 0.39                    | 0.016    | 0.010  | 1.09E-01        | -0.012   | 0.010  | 2.38E-01        | 0.042     | 0.015   | 3.60E-03        | GCKR       |
| ILMN_1741462   | FAHD1     | rs1065656  | G             | 0.72                    | 0.006    | 0.007  | 3.83E-01        | -0.005   | 0.008  | 4.78E-01        | -0.019    | 0.007   | 4.00E-03        | NUBP2      |
| ILMN_1682864   | SPSB3     | rs1065656  | G             | 0.72                    | 0.023    | 0.016  | 1.46E-01        | 0.044    | 0.015  | 4.10E-03        | 0.042     | 0.023   | 6.50E-02        | NUBP2      |
| ILMN_2188966   | IGFALS    | rs1065656  | G             | 0.72                    | -0.007   | 0.006  | 2.04E-01        | 0.005    | 0.007  | 4.27E-01        | -0.023    | 0.008   | 4.20E-03        | NUBP2      |
| ILMN_2210482   | MRPS34    | rs1065656  | G             | 0.72                    | -0.016   | 0.010  | 1.05E-01        | -0.043   | 0.016  | 7.40E-03        | -0.013    | 0.013   | 3.15E-01        | NUBP2      |
| ILMN_1710416   | HS3ST6    | rs1065656  | G             | 0.72                    | -0.010   | 0.005  | 5.70E-02        | 0.002    | 0.006  | 6.95E-01        | 0.065     | 0.024   | 7.60E-03        | NUBP2      |
| ILMN_1739521   | NLGN1     | rs509035   | G             | 0.68                    | -0.033   | 0.012  | 7.80E-03        | 0.003    | 0.006  | 6.11E-01        | 0.009     | 0.010   | 3.44E-01        | GHSR       |
| ILMN_1687037   | IFT140    | rs1065656  | G             | 0.72                    | 0.016    | 0.008  | 4.29E-02        | 0.026    | 0.010  | 7.80E-03        | -0.011    | 0.013   | 3.91E-01        | NUBP2      |
| ILMN_1747436   | SCML4     | rs2153960  | G             | 0.29                    | -0.005   | 0.005  | 2.93E-01        | -0.019   | 0.007  | 9.20E-03        | -0.005    | 0.006   | 3.57E-01        | FOXO3      |
| ILMN_1659937   | ZBTB24    | rs2153960  | G             | 0.29                    | 0.011    | 0.010  | 2.70E-01        | 0.028    | 0.011  | 9.60E-03        | -0.017    | 0.013   | 1.89E-01        | FOXO3      |
| ILMN_1713884   | C16orf42  | rs1065656  | G             | 0.72                    | -0.004   | 0.016  | 8.21E-01        | -0.039   | 0.015  | 9.60E-03        | -0.009    | 0.018   | 6.23E-01        | NUBP2      |
| ILMN_1791217   | FAM40A    | rs646776   | T             | 0.78                    | 0.013    | 0.011  | 2.31E-01        | -0.021   | 0.012  | 8.69E-02        | 0.037     | 0.015   | 1.08E-02        | CELSR2     |
| ILMN_2173835   | FTHL3     | rs780093   | T             | 0.39                    | 0.022    | 0.027  | 4.19E-01        | 0.020    | 0.026  | 4.29E-01        | 0.039     | 0.015   | 1.19E-02        | GCKR       |
| ILMN_2055165   | MRFAP1    | rs4234798  | T             | 0.38                    | 0.024    | 0.014  | 8.04E-02        | 0.002    | 0.010  | 8.37E-01        | -0.045    | 0.018   | 1.26E-02        | SORCS2     |
| ILMN_1754241   | C16orf73  | rs1065656  | G             | 0.72                    | -0.005   | 0.006  | 3.60E-01        | 0.009    | 0.006  | 1.58E-01        | 0.019     | 0.008   | 1.26E-02        | NUBP2      |
| ILMN_2057566   | PGP       | rs1065656  | G             | 0.72                    | 0.037    | 0.015  | 1.35E-02        | -0.021   | 0.018  | 2.42E-01        | 0.035     | 0.017   | 4.42E-02        | NUBP2      |
| ILMN_1806867   | PPM1G     | rs780093   | T             | 0.39                    | 0.013    | 0.012  | 2.43E-01        | -0.004   | 0.014  | 7.80E-01        | -0.034    | 0.014   | 1.38E-02        | GCKR       |
| ILMN_1775549   | PRSS27    | rs1065656  | G             | 0.72                    | 0.009    | 0.007  | 1.83E-01        | 0.012    | 0.008  | 1.25E-01        | 0.026     | 0.011   | 1.43E-02        | NUBP2      |
| ILMN_1670096   | NRBP1     | rs780093   | T             | 0.39                    | 0.019    | 0.012  | 1.15E-01        | 0.031    | 0.013  | 1.45E-02        | 0.013     | 0.012   | 2.86E-01        | GCKR       |
| ILMN_1801307   | TNFSF10   | rs509035   | G             | 0.68                    | -0.049   | 0.020  | 1.51E-02        | -0.026   | 0.023  | 2.50E-01        | -0.026    | 0.022   | 2.44E-01        | GHSR       |
| ILMN_2227968   | NTHL1     | rs1065656  | G             | 0.72                    | 0.039    | 0.016  | 1.55E-02        | -0.001   | 0.018  | 9.63E-01        | 0.007     | 0.018   | 7.17E-01        | NUBP2      |
| ILMN_1678173   | KHK       | rs780093   | T             | 0.39                    | -0.009   | 0.006  | 1.07E-01        | -0.008   | 0.009  | 3.78E-01        | -0.016    | 0.007   | 1.62E-02        | GCKR       |
| ILMN_1748157   | EIF2B4    | rs780093   | T             | 0.39                    | -0.007   | 0.005  | 2.12E-01        | 0.011    | 0.005  | 2.32E-02        | 0.013     | 0.005   | 1.76E-02        | GCKR       |
| ILMN_1784352   | CCM2      | rs11977526 | G             | 0.63                    | -0.037   | 0.016  | 1.87E-02        | 0.030    | 0.014  | 2.51E-02        | -0.009    | 0.020   | 6.41E-01        | IGFBP3     |
| ILMN_1709613   | IGF1      | rs978458   | T             | 0.27                    | 0.065    | 0.028  | 1.88E-02        | -0.004   | 0.012  | 7.60E-01        | 0.003     | 0.007   | 6.76E-01        | IGF1       |
| ILMN_1657237   | NUBP2     | rs1065656  | G             | 0.72                    | 0.029    | 0.012  | 1.99E-02        | 0.022    | 0.012  | 7.57E-02        | 0.035     | 0.016   | 2.88E-02        | NUBP2      |

|              |          |           |   |      |        |       |          |        |       |          |        |       |          |        |
|--------------|----------|-----------|---|------|--------|-------|----------|--------|-------|----------|--------|-------|----------|--------|
| ILMN_1750790 | GSTM5    | rs646776  | T | 0.78 | 0.037  | 0.029 | 2.03E-01 | 0.017  | 0.007 | 2.00E-02 | 0.020  | 0.025 | 4.10E-01 | CELSR2 |
| ILMN_1670817 | GRPEL1   | rs4234798 | T | 0.38 | 0.023  | 0.014 | 1.03E-01 | -0.004 | 0.012 | 7.66E-01 | -0.031 | 0.013 | 2.02E-02 | SORCS2 |
| ILMN_1799100 | C16orf38 | rs1065656 | G | 0.72 | -0.001 | 0.006 | 9.25E-01 | 0.003  | 0.008 | 7.09E-01 | -0.015 | 0.007 | 2.03E-02 | NUBP2  |
| ILMN_1765438 | C6orf184 | rs2153960 | G | 0.29 | -0.015 | 0.007 | 2.13E-02 | -0.007 | 0.006 | 2.71E-01 | 0.001  | 0.006 | 8.97E-01 | FOXO3  |
| ILMN_1695005 | C1orf62  | rs646776  | T | 0.78 | -0.003 | 0.006 | 5.92E-01 | -0.013 | 0.006 | 2.19E-02 | 0.003  | 0.007 | 7.06E-01 | CELSR2 |
| ILMN_1695759 | AMDHD2   | rs1065656 | G | 0.72 | 0.045  | 0.019 | 2.19E-02 | -0.002 | 0.016 | 8.77E-01 | 0.016  | 0.020 | 4.43E-01 | NUBP2  |
| ILMN_1727055 | C12orf48 | rs978458  | T | 0.27 | 0.011  | 0.007 | 1.16E-01 | 0.060  | 0.026 | 2.23E-02 | -0.001 | 0.009 | 8.96E-01 | IGF1   |
| ILMN_1682428 | C1orf59  | rs646776  | T | 0.78 | 0.030  | 0.013 | 2.37E-02 | 0.025  | 0.025 | 3.33E-01 | 0.002  | 0.015 | 9.04E-01 | CELSR2 |
| ILMN_1765522 | PPM1G    | rs780093  | T | 0.39 | -0.013 | 0.006 | 2.46E-02 | -0.011 | 0.014 | 4.43E-01 | 0.006  | 0.006 | 3.28E-01 | GCKR   |
| ILMN_2203987 | LACE1    | rs2153960 | G | 0.29 | -0.019 | 0.008 | 2.64E-02 | -0.003 | 0.006 | 6.86E-01 | -0.004 | 0.006 | 4.73E-01 | FOXO3  |
| ILMN_1729325 | ALX3     | rs646776  | T | 0.78 | 0.015  | 0.007 | 2.76E-02 | -0.004 | 0.008 | 6.06E-01 | 0.003  | 0.007 | 6.34E-01 | CELSR2 |
| ILMN_1706690 | KHK      | rs780093  | T | 0.39 | -0.002 | 0.005 | 7.46E-01 | -0.003 | 0.009 | 7.58E-01 | -0.011 | 0.005 | 2.78E-02 | GCKR   |
| ILMN_1698137 | DNMT3A   | rs934073  | G | 0.29 | -0.009 | 0.006 | 1.21E-01 | 0.011  | 0.008 | 1.61E-01 | -0.015 | 0.007 | 2.82E-02 | ASXL2  |
| ILMN_1717915 | TRIM54   | rs780093  | T | 0.39 | 0.002  | 0.005 | 7.11E-01 | 0.002  | 0.007 | 7.84E-01 | -0.013 | 0.006 | 2.97E-02 | GCKR   |
| ILMN_1663032 | FNDCA    | rs780093  | T | 0.39 | 0.029  | 0.013 | 3.05E-02 | 0.002  | 0.005 | 7.00E-01 | -0.002 | 0.009 | 7.90E-01 | GCKR   |
| ILMN_1801152 | PSRC1    | rs646776  | T | 0.78 | 0.016  | 0.007 | 3.14E-02 | -0.015 | 0.007 | 3.22E-02 | -0.015 | 0.008 | 5.15E-02 | CELSR2 |
| ILMN_1759023 | WFS1     | rs4234798 | T | 0.38 | -0.041 | 0.019 | 3.14E-02 | -0.004 | 0.020 | 8.33E-01 | 0.008  | 0.019 | 6.69E-01 | SORCS2 |
| ILMN_1810436 | DNAJC27  | rs934073  | G | 0.29 | -0.001 | 0.012 | 9.49E-01 | -0.012 | 0.011 | 2.79E-01 | -0.030 | 0.014 | 3.24E-02 | ASXL2  |
| ILMN_2170095 | PMCH     | rs978458  | T | 0.27 | -0.007 | 0.005 | 1.92E-01 | 0.012  | 0.005 | 3.25E-02 | 0.006  | 0.006 | 3.53E-01 | IGF1   |
| ILMN_1805807 | SLC30A3  | rs780093  | T | 0.39 | -0.009 | 0.009 | 3.63E-01 | 0.016  | 0.008 | 5.97E-02 | -0.025 | 0.012 | 3.29E-02 | GCKR   |
| ILMN_2061446 | AADACL1  | rs509035  | G | 0.68 | -0.025 | 0.012 | 3.30E-02 | 0.013  | 0.009 | 1.32E-01 | 0.009  | 0.009 | 3.37E-01 | GHSR   |
| ILMN_1671225 | GPR61    | rs646776  | T | 0.78 | 0.015  | 0.007 | 3.35E-02 | 0.005  | 0.009 | 5.53E-01 | -0.002 | 0.007 | 7.84E-01 | CELSR2 |
| ILMN_1733927 | TCEB2    | rs1065656 | G | 0.72 | 0.029  | 0.014 | 3.44E-02 | 0.018  | 0.014 | 1.75E-01 | 0.013  | 0.017 | 4.40E-01 | NUBP2  |
| ILMN_1801366 | DNASE1L2 | rs1065656 | G | 0.72 | 0.014  | 0.007 | 3.45E-02 | 0.008  | 0.007 | 2.35E-01 | -0.023 | 0.037 | 5.44E-01 | NUBP2  |
| ILMN_1765460 | AMIGO1   | rs646776  | T | 0.78 | 0.014  | 0.007 | 3.62E-02 | 0.009  | 0.009 | 3.02E-01 | 0.014  | 0.007 | 4.70E-02 | CELSR2 |
| ILMN_1795704 | KIAA0232 | rs4234798 | T | 0.38 | 0.005  | 0.007 | 4.87E-01 | -0.017 | 0.008 | 3.71E-02 | 0.002  | 0.009 | 7.74E-01 | SORCS2 |
| ILMN_1698968 | ASXL2    | rs934073  | G | 0.29 | -0.028 | 0.015 | 7.10E-02 | 0.035  | 0.017 | 3.73E-02 | 0.025  | 0.021 | 2.36E-01 | ASXL2  |
| ILMN_2123521 | SYCP3    | rs978458  | T | 0.27 | 0.015  | 0.007 | 3.78E-02 | -0.002 | 0.007 | 7.83E-01 | -0.010 | 0.008 | 1.75E-01 | IGF1   |
| ILMN_1696003 | GNAI3    | rs646776  | T | 0.78 | -0.023 | 0.014 | 1.08E-01 | -0.049 | 0.024 | 3.85E-02 | -0.033 | 0.022 | 1.25E-01 | CELSR2 |
| ILMN_2284013 | KCNC4    | rs646776  | T | 0.78 | -0.006 | 0.007 | 3.97E-01 | -0.006 | 0.007 | 3.37E-01 | 0.014  | 0.007 | 3.96E-02 | CELSR2 |
| ILMN_1685079 | TELO2    | rs1065656 | G | 0.72 | 0.030  | 0.015 | 4.20E-02 | 0.003  | 0.015 | 8.35E-01 | 0.048  | 0.027 | 7.89E-02 | NUBP2  |
| ILMN_2136068 | SEC63    | rs2153960 | G | 0.29 | 0.013  | 0.006 | 4.24E-02 | 0.008  | 0.008 | 3.10E-01 | 0.004  | 0.006 | 5.05E-01 | FOXO3  |
| ILMN_1701653 | ASCL1    | rs978458  | T | 0.27 | 0.002  | 0.006 | 7.69E-01 | -0.025 | 0.036 | 4.99E-01 | -0.014 | 0.007 | 4.45E-02 | IGF1   |
| ILMN_1669645 | PKD1     | rs1065656 | G | 0.72 | 0.019  | 0.016 | 2.26E-01 | 0.034  | 0.017 | 4.55E-02 | 0.013  | 0.021 | 5.13E-01 | NUBP2  |
| ILMN_1654408 | TRAF7    | rs1065656 | G | 0.72 | 0.002  | 0.006 | 6.99E-01 | -0.013 | 0.007 | 5.19E-02 | 0.001  | 0.006 | 8.23E-01 | NUBP2  |
| ILMN_1730824 | ZNF512   | rs780093  | T | 0.39 | -0.026 | 0.013 | 5.35E-02 | -0.013 | 0.013 | 3.40E-01 | 0.007  | 0.014 | 5.99E-01 | GCKR   |
| ILMN_1701998 | AFAP1    | rs4234798 | T | 0.38 | -0.031 | 0.016 | 5.39E-02 | 0.002  | 0.006 | 7.47E-01 | 0.020  | 0.017 | 2.31E-01 | SORCS2 |
| ILMN_1707713 | CIB4     | rs934073  | G | 0.29 | 0.005  | 0.005 | 3.38E-01 | -0.005 | 0.005 | 3.40E-01 | 0.010  | 0.005 | 5.44E-02 | ASXL2  |
| ILMN_1725554 | DNAJC5G  | rs780093  | T | 0.39 | -0.005 | 0.004 | 2.52E-01 | -0.005 | 0.006 | 3.75E-01 | -0.010 | 0.005 | 5.68E-02 | GCKR   |
| ILMN_1656452 | C16orf59 | rs1065656 | G | 0.72 | -0.001 | 0.006 | 8.52E-01 | -0.042 | 0.022 | 5.77E-02 | -0.012 | 0.010 | 2.61E-01 | NUBP2  |
| ILMN_1771903 | NUP37    | rs978458  | T | 0.27 | 0.020  | 0.014 | 1.58E-01 | 0.030  | 0.016 | 5.90E-02 | 0.010  | 0.017 | 5.41E-01 | IGF1   |
| ILMN_1742073 | ADCY1    | rs700753  | G | 0.66 | -0.009 | 0.005 | 5.93E-02 | -0.003 | 0.006 | 5.76E-01 | -0.002 | 0.005 | 6.97E-01 | TNS3   |

|              |          |            |   |      |        |       |          |        |       |          |        |       |          |        |
|--------------|----------|------------|---|------|--------|-------|----------|--------|-------|----------|--------|-------|----------|--------|
| ILMN_1674996 | UNKL     | rs1065656  | G | 0.72 | -0.002 | 0.005 | 7.67E-01 | -0.001 | 0.006 | 8.39E-01 | 0.012  | 0.007 | 6.13E-02 | NUBP2  |
| ILMN_1696830 | AMPD2    | rs646776   | T | 0.78 | 0.007  | 0.008 | 3.61E-01 | 0.018  | 0.010 | 6.29E-02 | 0.005  | 0.008 | 5.43E-01 | CELSR2 |
| ILMN_1671933 | CLCC1    | rs646776   | T | 0.78 | -0.005 | 0.012 | 6.54E-01 | -0.028 | 0.015 | 6.29E-02 | -0.041 | 0.027 | 1.27E-01 | CELSR2 |
| ILMN_2328952 | CLCC1    | rs646776   | T | 0.78 | 0.004  | 0.006 | 5.07E-01 | 0.013  | 0.007 | 6.32E-02 | -0.005 | 0.006 | 4.17E-01 | CELSR2 |
| ILMN_1771185 | EME2     | rs1065656  | G | 0.72 | -0.011 | 0.006 | 6.42E-02 | -0.006 | 0.007 | 3.76E-01 | 0.008  | 0.006 | 1.69E-01 | NUBP2  |
| ILMN_1741054 | SLC5A6   | rs780093   | T | 0.39 | 0.024  | 0.019 | 2.15E-01 | 0.008  | 0.017 | 6.44E-01 | -0.028 | 0.015 | 6.55E-02 | GCKR   |
| ILMN_2075820 | ZNF598   | rs1065656  | G | 0.72 | -0.009 | 0.008 | 2.76E-01 | -0.026 | 0.014 | 7.32E-02 | 0.008  | 0.013 | 5.54E-01 | NUBP2  |
| ILMN_1736831 | PRSS33   | rs1065656  | G | 0.72 | -0.005 | 0.005 | 3.82E-01 | -0.003 | 0.005 | 5.95E-01 | 0.010  | 0.005 | 7.36E-02 | NUBP2  |
| ILMN_1787477 | CENPO    | rs934073   | G | 0.29 | -0.001 | 0.005 | 8.62E-01 | 0.028  | 0.016 | 7.73E-02 | -0.010 | 0.008 | 1.99E-01 | ASXL2  |
| ILMN_2403664 | POMC     | rs934073   | G | 0.29 | -0.020 | 0.011 | 7.77E-02 | -0.019 | 0.026 | 4.63E-01 | 0.001  | 0.010 | 9.24E-01 | ASXL2  |
| ILMN_1687835 | C6orf224 | rs2153960  | G | 0.29 | -0.006 | 0.008 | 4.16E-01 | 0.010  | 0.006 | 7.78E-02 | 0.006  | 0.008 | 4.41E-01 | FOXO3  |
| ILMN_1739054 | CCDC121  | rs780093   | T | 0.39 | -0.007 | 0.007 | 3.51E-01 | -0.011 | 0.006 | 7.79E-02 | 0.011  | 0.007 | 8.75E-02 | GCKR   |
| ILMN_2120555 | ADCY1    | rs700753   | G | 0.66 | 0.017  | 0.010 | 7.93E-02 | -0.005 | 0.017 | 7.63E-01 | -0.010 | 0.008 | 2.07E-01 | TNS3   |
| ILMN_1732810 | SNX17    | rs780093   | T | 0.39 | 0.005  | 0.011 | 6.23E-01 | -0.006 | 0.008 | 5.11E-01 | -0.022 | 0.013 | 8.17E-02 | GCKR   |
| ILMN_1811754 | NDUFB10  | rs1065656  | G | 0.72 | -0.057 | 0.034 | 9.34E-02 | -0.051 | 0.030 | 8.29E-02 | 0.003  | 0.041 | 9.35E-01 | NUBP2  |
| ILMN_1685095 | CNO      | rs4234798  | T | 0.38 | 0.020  | 0.012 | 8.52E-02 | 0.004  | 0.010 | 6.76E-01 | -0.017 | 0.011 | 1.39E-01 | SORCS2 |
| ILMN_2291152 | PPP2R2C  | rs4234798  | T | 0.38 | -0.001 | 0.005 | 8.82E-01 | 0.010  | 0.006 | 8.52E-02 | -0.004 | 0.006 | 4.37E-01 | SORCS2 |
| ILMN_1801257 | CENPA    | rs780093   | T | 0.39 | 0.010  | 0.006 | 9.71E-02 | -0.006 | 0.019 | 7.33E-01 | -0.021 | 0.012 | 8.60E-02 | GCKR   |
| ILMN_1808512 | TPSD1    | rs1065656  | G | 0.72 | -0.004 | 0.005 | 4.63E-01 | 0.002  | 0.006 | 7.27E-01 | 0.010  | 0.006 | 8.66E-02 | NUBP2  |
| ILMN_2213008 | ARMC2    | rs2153960  | G | 0.29 | -0.011 | 0.006 | 8.68E-02 | 0.008  | 0.007 | 2.58E-01 | -0.008 | 0.006 | 2.07E-01 | FOXO3  |
| ILMN_2280816 | CEMP1    | rs1065656  | G | 0.72 | 0.004  | 0.008 | 6.69E-01 | -0.003 | 0.013 | 8.13E-01 | -0.016 | 0.010 | 8.68E-02 | NUBP2  |
| ILMN_1711439 | EMILIN1  | rs780093   | T | 0.39 | 0.022  | 0.013 | 8.70E-02 | 0.014  | 0.017 | 4.13E-01 | -0.010 | 0.015 | 4.97E-01 | GCKR   |
| ILMN_1765833 | SLC9A3R2 | rs1065656  | G | 0.72 | 0.014  | 0.016 | 3.74E-01 | 0.000  | 0.006 | 9.53E-01 | 0.017  | 0.010 | 8.71E-02 | NUBP2  |
| ILMN_2169801 | TPSAB1   | rs1065656  | G | 0.72 | 0.070  | 0.041 | 8.75E-02 | 0.008  | 0.007 | 2.14E-01 | 0.004  | 0.056 | 9.45E-01 | NUBP2  |
| ILMN_1726417 | MRPL33   | rs780093   | T | 0.39 | -0.002 | 0.015 | 8.95E-01 | 0.014  | 0.024 | 5.65E-01 | 0.027  | 0.016 | 8.77E-02 | GCKR   |
| ILMN_1751559 | C16orf30 | rs1065656  | G | 0.72 | -0.007 | 0.016 | 6.58E-01 | 0.023  | 0.013 | 8.99E-02 | 0.002  | 0.016 | 8.85E-01 | NUBP2  |
| ILMN_1786789 | FAM102B  | rs646776   | T | 0.78 | -0.013 | 0.012 | 2.62E-01 | -0.023 | 0.013 | 9.27E-02 | -0.001 | 0.013 | 9.67E-01 | CELSR2 |
| ILMN_2340886 | OTOF     | rs934073   | G | 0.29 | 0.010  | 0.006 | 9.44E-02 | 0.007  | 0.008 | 3.49E-01 | -0.003 | 0.006 | 6.21E-01 | ASXL2  |
| ILMN_1758523 | ABCA3    | rs1065656  | G | 0.72 | 0.000  | 0.014 | 9.95E-01 | -0.016 | 0.009 | 9.63E-02 | -0.016 | 0.014 | 2.58E-01 | NUBP2  |
| ILMN_1805930 | CSF1     | rs646776   | T | 0.78 | -0.019 | 0.012 | 9.64E-02 | -0.004 | 0.007 | 5.55E-01 | 0.010  | 0.012 | 3.84E-01 | CELSR2 |
| ILMN_1795893 | TMEM167B | rs646776   | T | 0.78 | 0.008  | 0.015 | 5.96E-01 | -0.012 | 0.016 | 4.54E-01 | 0.029  | 0.017 | 9.69E-02 | CELSR2 |
| ILMN_1762897 | GPR113   | rs934073   | G | 0.29 | 0.001  | 0.007 | 8.50E-01 | -0.012 | 0.007 | 9.89E-02 | 0.008  | 0.008 | 3.70E-01 | ASXL2  |
| ILMN_1753131 | SPATA16  | rs509035   | G | 0.68 | 0.001  | 0.005 | 8.97E-01 | 0.011  | 0.006 | 9.95E-02 | -0.003 | 0.006 | 6.15E-01 | GHSR   |
| ILMN_1779256 | ARMC2    | rs2153960  | G | 0.29 | 0.001  | 0.006 | 8.39E-01 | -0.009 | 0.005 | 1.00E-01 | -0.003 | 0.008 | 7.17E-01 | FOXO3  |
| ILMN_1810554 | PDPK1    | rs1065656  | G | 0.72 | -0.009 | 0.006 | 1.02E-01 | 0.006  | 0.006 | 3.30E-01 | 0.009  | 0.007 | 2.10E-01 | NUBP2  |
| ILMN_1742073 | ADCY1    | rs11977526 | G | 0.63 | -0.008 | 0.005 | 1.02E-01 | 0.000  | 0.006 | 9.42E-01 | -0.003 | 0.006 | 5.49E-01 | IGFBP3 |
| ILMN_1660551 | CRAMP1L  | rs1065656  | G | 0.72 | -0.010 | 0.014 | 4.49E-01 | 0.018  | 0.012 | 1.48E-01 | -0.028 | 0.017 | 1.03E-01 | NUBP2  |
| ILMN_1694731 | CLCN7    | rs1065656  | G | 0.72 | 0.029  | 0.018 | 1.04E-01 | 0.017  | 0.016 | 2.70E-01 | 0.007  | 0.022 | 7.39E-01 | NUBP2  |
| ILMN_1711720 | C12orf42 | rs978458   | T | 0.27 | 0.005  | 0.005 | 3.75E-01 | 0.010  | 0.006 | 1.04E-01 | -0.005 | 0.006 | 3.75E-01 | IGF1   |
| ILMN_1789005 | ATP6V0C  | rs1065656  | G | 0.72 | 0.026  | 0.016 | 1.04E-01 | 0.004  | 0.009 | 6.67E-01 | 0.016  | 0.018 | 3.60E-01 | NUBP2  |
| ILMN_1672176 | SMPD2    | rs2153960  | G | 0.29 | 0.015  | 0.009 | 1.05E-01 | 0.012  | 0.012 | 3.15E-01 | 0.001  | 0.018 | 9.40E-01 | FOXO3  |
| ILMN_1708337 | NOXO1    | rs1065656  | G | 0.72 | -0.005 | 0.008 | 5.31E-01 | -0.002 | 0.011 | 8.44E-01 | -0.013 | 0.008 | 1.05E-01 | NUBP2  |

|              |          |            |   |      |        |       |          |        |       |          |        |       |          |        |
|--------------|----------|------------|---|------|--------|-------|----------|--------|-------|----------|--------|-------|----------|--------|
| ILMN_1652198 | CCM2     | rs11977526 | G | 0.63 | 0.006  | 0.006 | 3.37E-01 | 0.010  | 0.014 | 4.99E-01 | 0.010  | 0.006 | 1.06E-01 | IGFBP3 |
| ILMN_1786972 | SARS     | rs646776   | T | 0.78 | -0.005 | 0.020 | 8.07E-01 | -0.036 | 0.022 | 1.09E-01 | -0.039 | 0.029 | 1.75E-01 | CELSR2 |
| ILMN_1836744 | PGP      | rs1065656  | G | 0.72 | 0.016  | 0.010 | 1.09E-01 | -0.006 | 0.011 | 6.05E-01 | 0.008  | 0.011 | 4.46E-01 | NUBP2  |
| ILMN_1759325 | C16orf91 | rs1065656  | G | 0.72 | -0.017 | 0.011 | 1.11E-01 | -0.004 | 0.013 | 7.93E-01 | -0.013 | 0.015 | 3.87E-01 | NUBP2  |
| ILMN_1664622 | KIAA0953 | rs934073   | G | 0.29 | 0.006  | 0.005 | 2.90E-01 | 0.003  | 0.006 | 6.38E-01 | 0.009  | 0.006 | 1.14E-01 | ASXL2  |
| ILMN_1732127 | RBKS     | rs780093   | T | 0.39 | -0.006 | 0.008 | 4.49E-01 | 0.001  | 0.009 | 8.96E-01 | -0.014 | 0.009 | 1.16E-01 | GCKR   |
| ILMN_1720303 | OSTM1    | rs2153960  | G | 0.29 | -0.023 | 0.019 | 2.08E-01 | -0.015 | 0.010 | 1.18E-01 | 0.006  | 0.015 | 7.10E-01 | FOXO3  |
| ILMN_1810550 | BAIAP3   | rs1065656  | G | 0.72 | -0.001 | 0.006 | 8.21E-01 | -0.006 | 0.006 | 2.70E-01 | 0.009  | 0.006 | 1.21E-01 | NUBP2  |
| ILMN_1717173 | ECT2     | rs509035   | G | 0.68 | -0.016 | 0.010 | 1.21E-01 | -0.040 | 0.027 | 1.43E-01 | -0.004 | 0.012 | 7.43E-01 | GHSR   |
| ILMN_1719696 | PLD1     | rs509035   | G | 0.68 | -0.021 | 0.013 | 1.22E-01 | -0.031 | 0.034 | 3.62E-01 | -0.019 | 0.016 | 2.52E-01 | GHSR   |
| ILMN_1727850 | KCNC4    | rs646776   | T | 0.78 | 0.003  | 0.006 | 6.31E-01 | -0.004 | 0.007 | 5.56E-01 | -0.010 | 0.007 | 1.26E-01 | CELSR2 |
| ILMN_2197846 | HADHB    | rs934073   | G | 0.29 | -0.023 | 0.015 | 1.27E-01 | 0.001  | 0.013 | 9.46E-01 | -0.016 | 0.020 | 4.23E-01 | ASXL2  |
| ILMN_1706118 | HN1L     | rs1065656  | G | 0.72 | 0.017  | 0.011 | 1.29E-01 | 0.018  | 0.014 | 1.78E-01 | 0.021  | 0.014 | 1.28E-01 | NUBP2  |
| ILMN_1733930 | PREB     | rs780093   | T | 0.39 | 0.020  | 0.013 | 1.28E-01 | -0.007 | 0.013 | 5.76E-01 | -0.008 | 0.010 | 4.39E-01 | GCKR   |
| ILMN_1696133 | SELI     | rs934073   | G | 0.29 | -0.006 | 0.009 | 4.89E-01 | -0.004 | 0.013 | 7.46E-01 | -0.028 | 0.019 | 1.29E-01 | ASXL2  |
| ILMN_1672728 | KCTD5    | rs1065656  | G | 0.72 | -0.008 | 0.014 | 5.58E-01 | 0.026  | 0.017 | 1.30E-01 | -0.010 | 0.019 | 5.83E-01 | NUBP2  |
| ILMN_1691090 | MPV17    | rs780093   | T | 0.39 | -0.013 | 0.014 | 3.47E-01 | 0.017  | 0.011 | 1.35E-01 | -0.003 | 0.014 | 8.50E-01 | GCKR   |
| ILMN_2290776 | AGBL5    | rs780093   | T | 0.39 | -0.008 | 0.008 | 3.37E-01 | -0.008 | 0.011 | 4.78E-01 | -0.014 | 0.009 | 1.37E-01 | GCKR   |
| ILMN_1662934 | UBE2I    | rs1065656  | G | 0.72 | 0.010  | 0.007 | 1.38E-01 | 0.000  | 0.007 | 9.85E-01 | 0.008  | 0.008 | 3.20E-01 | NUBP2  |
| ILMN_1700889 | PRR25    | rs1065656  | G | 0.72 | 0.009  | 0.006 | 1.38E-01 | NA     | NA    | NA       | NA     | NA    | NA       | NUBP2  |
| ILMN_2218104 | PAH      | rs978458   | T | 0.27 | -0.008 | 0.006 | 1.46E-01 | 0.009  | 0.006 | 1.41E-01 | -0.004 | 0.006 | 5.41E-01 | IGF1   |
| ILMN_1663347 | OTOF     | rs934073   | G | 0.29 | -0.001 | 0.006 | 9.07E-01 | -0.066 | 0.045 | 1.41E-01 | 0.005  | 0.009 | 5.61E-01 | ASXL2  |
| ILMN_2084073 | UCN      | rs780093   | T | 0.39 | 0.009  | 0.006 | 1.41E-01 | 0.007  | 0.009 | 3.92E-01 | 0.000  | 0.007 | 9.76E-01 | GCKR   |
| ILMN_1731215 | MYBPHL   | rs646776   | T | 0.78 | 0.005  | 0.006 | 3.81E-01 | 0.010  | 0.007 | 1.44E-01 | 0.004  | 0.006 | 5.65E-01 | CELSR2 |
| ILMN_1741869 | WDR47    | rs646776   | T | 0.78 | -0.005 | 0.017 | 7.74E-01 | 0.008  | 0.017 | 6.19E-01 | 0.043  | 0.029 | 1.46E-01 | CELSR2 |
| ILMN_1779886 | TBC1D14  | rs4234798  | T | 0.38 | 0.015  | 0.010 | 1.50E-01 | -0.006 | 0.010 | 5.19E-01 | -0.015 | 0.015 | 3.19E-01 | SORCS2 |
| ILMN_1758825 | ABLIM2   | rs4234798  | T | 0.38 | -0.017 | 0.013 | 2.04E-01 | -0.001 | 0.006 | 7.99E-01 | 0.024  | 0.017 | 1.52E-01 | SORCS2 |
| ILMN_1693388 | NOXO1    | rs1065656  | G | 0.72 | 0.006  | 0.006 | 3.00E-01 | -0.009 | 0.006 | 1.52E-01 | 0.002  | 0.007 | 7.38E-01 | NUBP2  |
| ILMN_2397188 | CACNA1H  | rs1065656  | G | 0.72 | 0.008  | 0.010 | 4.15E-01 | 0.008  | 0.006 | 1.54E-01 | -0.024 | 0.048 | 6.09E-01 | NUBP2  |
| ILMN_1801216 | S100P    | rs4234798  | T | 0.38 | -0.023 | 0.016 | 1.55E-01 | 0.002  | 0.006 | 7.47E-01 | -0.007 | 0.042 | 8.75E-01 | SORCS2 |
| ILMN_1799299 | PRPF38B  | rs646776   | T | 0.78 | -0.002 | 0.008 | 7.74E-01 | 0.024  | 0.017 | 1.58E-01 | 0.007  | 0.011 | 5.42E-01 | CELSR2 |
| ILMN_1673261 | EPS8L3   | rs646776   | T | 0.78 | -0.007 | 0.006 | 2.18E-01 | 0.004  | 0.006 | 5.34E-01 | 0.009  | 0.006 | 1.59E-01 | CELSR2 |
| ILMN_1778684 | BRE      | rs780093   | T | 0.39 | 0.011  | 0.008 | 1.60E-01 | 0.002  | 0.008 | 8.31E-01 | -0.002 | 0.009 | 8.19E-01 | GCKR   |
| ILMN_1701589 | AMPD2    | rs646776   | T | 0.78 | -0.008 | 0.006 | 1.63E-01 | -0.001 | 0.007 | 8.86E-01 | 0.001  | 0.007 | 8.51E-01 | CELSR2 |
| ILMN_2072875 | SUPT7L   | rs780093   | T | 0.39 | -0.009 | 0.006 | 1.63E-01 | 0.000  | 0.006 | 9.91E-01 | -0.008 | 0.007 | 2.19E-01 | GCKR   |
| ILMN_1664177 | ATXN7L2  | rs646776   | T | 0.78 | 0.012  | 0.009 | 1.64E-01 | -0.017 | 0.014 | 2.33E-01 | 0.009  | 0.015 | 5.63E-01 | CELSR2 |
| ILMN_2202940 | CHPT1    | rs978458   | T | 0.27 | -0.022 | 0.016 | 1.65E-01 | NA     | NA    | NA       | NA     | NA    | NA       | IGF1   |
| ILMN_2219351 | CENPO    | rs934073   | G | 0.29 | 0.000  | 0.005 | 9.44E-01 | 0.004  | 0.012 | 7.51E-01 | 0.008  | 0.005 | 1.65E-01 | ASXL2  |
| ILMN_1662214 | PAH      | rs978458   | T | 0.27 | 0.001  | 0.006 | 8.72E-01 | 0.009  | 0.006 | 1.70E-01 | -0.001 | 0.006 | 8.74E-01 | IGF1   |
| ILMN_2060212 | TBC1D24  | rs1065656  | G | 0.72 | -0.024 | 0.017 | 1.74E-01 | 0.017  | 0.014 | 2.15E-01 | -0.001 | 0.012 | 9.37E-01 | NUBP2  |
| ILMN_1746085 | IGFBP3   | rs700753   | G | 0.66 | 0.014  | 0.022 | 5.29E-01 | 0.008  | 0.006 | 1.75E-01 | -0.012 | 0.028 | 6.74E-01 | TNS3   |
| ILMN_1676336 | AADAFL1  | rs509035   | G | 0.68 | -0.008 | 0.023 | 7.16E-01 | 0.018  | 0.013 | 1.79E-01 | 0.003  | 0.013 | 8.13E-01 | GHSR   |

|              |          |            |   |      |        |       |          |        |       |          |        |       |          |        |
|--------------|----------|------------|---|------|--------|-------|----------|--------|-------|----------|--------|-------|----------|--------|
| ILMN_1709604 | SNORA64  | rs1065656  | G | 0.72 | 0.003  | 0.007 | 6.32E-01 | -0.023 | 0.017 | 1.81E-01 | -0.005 | 0.013 | 7.08E-01 | NUBP2  |
| ILMN_1669456 | NME3     | rs1065656  | G | 0.72 | 0.014  | 0.011 | 1.83E-01 | 0.019  | 0.028 | 4.85E-01 | -0.024 | 0.019 | 2.16E-01 | NUBP2  |
| ILMN_1786899 | AMPD2    | rs646776   | T | 0.78 | 0.009  | 0.007 | 1.85E-01 | -0.007 | 0.008 | 4.13E-01 | 0.008  | 0.007 | 2.43E-01 | CELSR2 |
| ILMN_1792382 | KCNC4    | rs646776   | T | 0.78 | -0.008 | 0.006 | 2.00E-01 | -0.009 | 0.007 | 1.86E-01 | -0.003 | 0.006 | 6.35E-01 | CELSR2 |
| ILMN_1695740 | C1QTNF8  | rs1065656  | G | 0.72 | 0.007  | 0.006 | 2.33E-01 | -0.002 | 0.008 | 7.68E-01 | -0.009 | 0.007 | 1.86E-01 | NUBP2  |
| ILMN_1770412 | AHCYL1   | rs646776   | T | 0.78 | 0.008  | 0.016 | 6.05E-01 | -0.020 | 0.015 | 1.89E-01 | -0.004 | 0.022 | 8.56E-01 | CELSR2 |
| ILMN_1799710 | CCDC96   | rs4234798  | T | 0.38 | -0.001 | 0.005 | 9.15E-01 | -0.008 | 0.006 | 1.92E-01 | 0.000  | 0.006 | 9.84E-01 | SORCS2 |
| ILMN_1712515 | FOXO3    | rs2153960  | G | 0.29 | 0.005  | 0.006 | 4.35E-01 | 0.005  | 0.008 | 5.48E-01 | 0.009  | 0.007 | 1.92E-01 | FOXO3  |
| ILMN_1797277 | KIF3C    | rs934073   | G | 0.29 | 0.007  | 0.006 | 2.60E-01 | -0.006 | 0.006 | 3.35E-01 | -0.010 | 0.008 | 1.93E-01 | ASXL2  |
| ILMN_1717492 | GHSR     | rs509035   | G | 0.68 | -0.003 | 0.006 | 5.46E-01 | 0.009  | 0.007 | 2.12E-01 | 0.008  | 0.006 | 1.93E-01 | GHSR   |
| ILMN_1669376 | DRAM1    | rs978458   | T | 0.27 | 0.008  | 0.013 | 5.38E-01 | 0.022  | 0.017 | 1.95E-01 | 0.004  | 0.013 | 7.79E-01 | IGF1   |
| ILMN_1894057 | NA       | rs1065656  | G | 0.72 | 0.005  | 0.008 | 5.30E-01 | -0.004 | 0.007 | 5.20E-01 | 0.012  | 0.009 | 1.95E-01 | NUBP2  |
| ILMN_2139816 | GPSM2    | rs646776   | T | 0.78 | -0.006 | 0.009 | 5.12E-01 | 0.003  | 0.015 | 8.35E-01 | -0.036 | 0.028 | 1.97E-01 | CELSR2 |
| ILMN_2126408 | UNKL     | rs1065656  | G | 0.72 | 0.009  | 0.007 | 1.98E-01 | 0.005  | 0.008 | 4.84E-01 | 0.009  | 0.008 | 2.55E-01 | NUBP2  |
| ILMN_1687940 | FOXO3    | rs2153960  | G | 0.29 | -0.007 | 0.006 | 2.01E-01 | -0.004 | 0.006 | 4.68E-01 | -0.001 | 0.005 | 8.13E-01 | FOXO3  |
| ILMN_1811574 | MAPK8IP3 | rs1065656  | G | 0.72 | 0.017  | 0.016 | 2.99E-01 | 0.030  | 0.034 | 3.83E-01 | 0.028  | 0.022 | 2.02E-01 | NUBP2  |
| ILMN_1676893 | ADCY3    | rs934073   | G | 0.29 | 0.008  | 0.016 | 6.21E-01 | -0.013 | 0.015 | 3.70E-01 | -0.019 | 0.015 | 2.04E-01 | ASXL2  |
| ILMN_1728445 | IGFBP1   | rs11977526 | G | 0.63 | -0.006 | 0.005 | 2.05E-01 | 0.001  | 0.006 | 8.99E-01 | -0.003 | 0.006 | 5.91E-01 | IGFBP3 |
| ILMN_1769219 | TPSG1    | rs1065656  | G | 0.72 | -0.008 | 0.007 | 2.06E-01 | -0.004 | 0.007 | 5.86E-01 | -0.005 | 0.011 | 6.55E-01 | NUBP2  |
| ILMN_1806691 | GHSR     | rs509035   | G | 0.68 | 0.001  | 0.006 | 8.13E-01 | 0.000  | 0.007 | 9.70E-01 | -0.008 | 0.006 | 2.06E-01 | GHSR   |
| ILMN_1657058 | PPIL6    | rs2153960  | G | 0.29 | -0.003 | 0.006 | 6.00E-01 | 0.001  | 0.006 | 8.33E-01 | 0.008  | 0.006 | 2.08E-01 | FOXO3  |
| ILMN_1691843 | RNPS1    | rs1065656  | G | 0.72 | -0.014 | 0.011 | 2.14E-01 | -0.004 | 0.012 | 7.13E-01 | -0.004 | 0.013 | 7.83E-01 | NUBP2  |
| ILMN_1714987 | TRIM54   | rs780093   | T | 0.39 | -0.006 | 0.005 | 2.17E-01 | -0.003 | 0.005 | 5.61E-01 | -0.001 | 0.005 | 7.86E-01 | GCKR   |
| ILMN_1786379 | SYNGR3   | rs1065656  | G | 0.72 | 0.001  | 0.006 | 8.54E-01 | 0.025  | 0.021 | 2.19E-01 | 0.000  | 0.006 | 1.00E+00 | NUBP2  |
| ILMN_1660424 | AFAP1    | rs4234798  | T | 0.38 | -0.006 | 0.005 | 2.93E-01 | -0.006 | 0.005 | 2.19E-01 | -0.002 | 0.005 | 7.35E-01 | SORCS2 |
| ILMN_1736184 | GSTM3    | rs646776   | T | 0.78 | 0.045  | 0.037 | 2.20E-01 | 0.001  | 0.009 | 9.13E-01 | -0.005 | 0.034 | 8.75E-01 | CELSR2 |
| ILMN_1788729 | TCF23    | rs780093   | T | 0.39 | 0.000  | 0.004 | 9.77E-01 | 0.007  | 0.006 | 2.22E-01 | 0.002  | 0.005 | 7.36E-01 | GCKR   |
| ILMN_1812615 | MYBPC1   | rs978458   | T | 0.27 | 0.006  | 0.006 | 3.12E-01 | 0.008  | 0.007 | 2.25E-01 | 0.001  | 0.010 | 9.27E-01 | IGF1   |
| ILMN_1815530 | GCKR     | rs780093   | T | 0.39 | -0.006 | 0.005 | 2.33E-01 | 0.001  | 0.005 | 8.79E-01 | -0.005 | 0.006 | 4.12E-01 | GCKR   |
| ILMN_1762631 | TSC2     | rs1065656  | G | 0.72 | 0.003  | 0.006 | 5.65E-01 | 0.006  | 0.005 | 2.34E-01 | 0.006  | 0.005 | 2.65E-01 | NUBP2  |
| ILMN_1690563 | SSTR5    | rs1065656  | G | 0.72 | 0.007  | 0.006 | 2.40E-01 | 0.001  | 0.006 | 8.38E-01 | 0.001  | 0.006 | 8.82E-01 | NUBP2  |
| ILMN_1723837 | SLC6A17  | rs646776   | T | 0.78 | 0.002  | 0.006 | 6.83E-01 | 0.008  | 0.007 | 2.45E-01 | -0.008 | 0.022 | 7.01E-01 | CELSR2 |
| ILMN_1713162 | GSTM2    | rs646776   | T | 0.78 | 0.029  | 0.025 | 2.48E-01 | 0.017  | 0.035 | 6.36E-01 | -0.012 | 0.027 | 6.53E-01 | CELSR2 |
| ILMN_1773119 | CCNF     | rs1065656  | G | 0.72 | 0.002  | 0.017 | 8.97E-01 | -0.021 | 0.018 | 2.48E-01 | 0.016  | 0.025 | 5.18E-01 | NUBP2  |
| ILMN_1768646 | FLJ32252 | rs1065656  | G | 0.72 | -0.006 | 0.005 | 2.48E-01 | -0.003 | 0.006 | 6.09E-01 | 0.005  | 0.006 | 3.50E-01 | NUBP2  |
| ILMN_1773849 | ATP6VOC  | rs1065656  | G | 0.72 | -0.011 | 0.018 | 5.53E-01 | 0.011  | 0.013 | 4.24E-01 | -0.026 | 0.023 | 2.51E-01 | NUBP2  |
| ILMN_1687442 | TNIK     | rs509035   | G | 0.68 | 0.000  | 0.006 | 9.43E-01 | -0.015 | 0.024 | 5.35E-01 | -0.006 | 0.005 | 2.55E-01 | GHSR   |
| ILMN_1812688 | C2orf18  | rs780093   | T | 0.39 | 0.005  | 0.010 | 6.58E-01 | -0.004 | 0.009 | 6.48E-01 | -0.018 | 0.016 | 2.56E-01 | GCKR   |
| ILMN_1806394 | UBL4B    | rs646776   | T | 0.78 | 0.005  | 0.006 | 4.42E-01 | 0.007  | 0.006 | 2.68E-01 | 0.007  | 0.006 | 2.56E-01 | CELSR2 |
| ILMN_1654429 | C12orf48 | rs978458   | T | 0.27 | 0.000  | 0.006 | 1.00E+00 | -0.002 | 0.008 | 7.59E-01 | 0.008  | 0.007 | 2.57E-01 | IGF1   |
| ILMN_1764827 | MRFAP1L1 | rs4234798  | T | 0.38 | 0.000  | 0.005 | 9.97E-01 | -0.009 | 0.008 | 2.59E-01 | 0.000  | 0.007 | 9.71E-01 | SORCS2 |
| ILMN_2302947 | CSF1     | rs646776   | T | 0.78 | -0.007 | 0.006 | 2.61E-01 | 0.002  | 0.006 | 7.77E-01 | 0.005  | 0.007 | 4.83E-01 | CELSR2 |

|              |          |            |   |      |        |       |          |        |       |          |        |       |          |        |
|--------------|----------|------------|---|------|--------|-------|----------|--------|-------|----------|--------|-------|----------|--------|
| ILMN_2356574 | GTF3C2   | rs780093   | T | 0.39 | -0.002 | 0.008 | 7.43E-01 | 0.006  | 0.010 | 5.31E-01 | 0.012  | 0.011 | 2.61E-01 | GCKR   |
| ILMN_1768510 | MAN2B2   | rs4234798  | T | 0.38 | -0.008 | 0.019 | 6.89E-01 | -0.016 | 0.014 | 2.61E-01 | -0.018 | 0.024 | 4.51E-01 | SORCS2 |
| ILMN_1692271 | CCM2     | rs11977526 | G | 0.63 | 0.006  | 0.006 | 3.43E-01 | 0.000  | 0.015 | 9.85E-01 | 0.009  | 0.008 | 2.62E-01 | IGFBP3 |
| ILMN_1738580 | NR2E1    | rs2153960  | G | 0.29 | 0.003  | 0.008 | 7.30E-01 | -0.008 | 0.007 | 2.65E-01 | -0.006 | 0.009 | 4.58E-01 | FOXO3  |
| ILMN_1745330 | RNF151   | rs1065656  | G | 0.72 | 0.006  | 0.006 | 2.93E-01 | 0.007  | 0.006 | 2.67E-01 | -0.004 | 0.006 | 5.56E-01 | NUBP2  |
| ILMN_1734766 | C6orf182 | rs2153960  | G | 0.29 | 0.003  | 0.005 | 5.71E-01 | -0.007 | 0.006 | 2.72E-01 | -0.002 | 0.006 | 8.01E-01 | FOXO3  |
| ILMN_1679039 | CASKIN1  | rs1065656  | G | 0.72 | 0.006  | 0.006 | 3.61E-01 | -0.006 | 0.005 | 2.74E-01 | -0.005 | 0.006 | 3.37E-01 | NUBP2  |
| ILMN_1743371 | ABHD1    | rs780093   | T | 0.39 | -0.012 | 0.011 | 2.75E-01 | -0.004 | 0.006 | 5.06E-01 | -0.005 | 0.006 | 3.68E-01 | GCKR   |
| ILMN_1754158 | C6orf185 | rs2153960  | G | 0.29 | -0.005 | 0.018 | 7.77E-01 | -0.005 | 0.005 | 2.79E-01 | 0.001  | 0.006 | 8.76E-01 | FOXO3  |
| ILMN_1746085 | IGFBP3   | rs11977526 | G | 0.63 | -0.004 | 0.022 | 8.64E-01 | 0.006  | 0.006 | 2.80E-01 | 0.006  | 0.029 | 8.47E-01 | IGFBP3 |
| ILMN_1658805 | BRE      | rs780093   | T | 0.39 | 0.004  | 0.005 | 3.90E-01 | -0.006 | 0.006 | 2.81E-01 | -0.003 | 0.006 | 6.31E-01 | GCKR   |
| ILMN_1664542 | UBE2I    | rs1065656  | G | 0.72 | -0.006 | 0.006 | 2.87E-01 | -0.001 | 0.009 | 9.30E-01 | -0.006 | 0.008 | 4.41E-01 | NUBP2  |
| ILMN_2320377 | MAPK8IP3 | rs1065656  | G | 0.72 | -0.005 | 0.006 | 3.90E-01 | 0.008  | 0.008 | 2.91E-01 | -0.007 | 0.007 | 3.07E-01 | NUBP2  |
| ILMN_1790317 | RAB26    | rs1065656  | G | 0.72 | -0.009 | 0.008 | 3.06E-01 | -0.003 | 0.009 | 7.24E-01 | 0.017  | 0.023 | 4.58E-01 | NUBP2  |
| ILMN_1771482 | KIAA1324 | rs646776   | T | 0.78 | 0.001  | 0.009 | 9.41E-01 | 0.019  | 0.018 | 3.06E-01 | 0.000  | 0.045 | 9.91E-01 | CELSR2 |
| ILMN_2315964 | PSRC1    | rs646776   | T | 0.78 | 0.008  | 0.008 | 3.08E-01 | -0.009 | 0.010 | 3.34E-01 | 0.002  | 0.008 | 7.82E-01 | CELSR2 |
| ILMN_2396875 | IGFBP3   | rs700753   | G | 0.66 | 0.019  | 0.019 | 3.26E-01 | 0.006  | 0.006 | 3.08E-01 | 0.000  | 0.024 | 9.97E-01 | TNS3   |
| ILMN_1740180 | SNX3     | rs2153960  | G | 0.29 | -0.002 | 0.018 | 9.26E-01 | -0.010 | 0.016 | 5.26E-01 | 0.025  | 0.025 | 3.09E-01 | FOXO3  |
| ILMN_1804509 | DPYSL5   | rs780093   | T | 0.39 | 0.005  | 0.007 | 4.20E-01 | 0.007  | 0.007 | 3.09E-01 | -0.001 | 0.006 | 9.28E-01 | GCKR   |
| ILMN_1676128 | DNMT3A   | rs934073   | G | 0.29 | 0.005  | 0.006 | 4.38E-01 | -0.015 | 0.015 | 3.12E-01 | -0.001 | 0.007 | 8.45E-01 | ASXL2  |
| ILMN_1671263 | CACNA1H  | rs1065656  | G | 0.72 | 0.014  | 0.014 | 3.12E-01 | 0.006  | 0.008 | 4.39E-01 | -0.021 | 0.057 | 7.06E-01 | NUBP2  |
| ILMN_1756595 | SH3TC1   | rs4234798  | T | 0.38 | -0.014 | 0.014 | 3.14E-01 | -0.011 | 0.018 | 5.55E-01 | 0.005  | 0.013 | 7.07E-01 | SORCS2 |
| ILMN_2335198 | NCOA1    | rs934073   | G | 0.29 | 0.004  | 0.006 | 4.67E-01 | 0.003  | 0.006 | 6.69E-01 | 0.006  | 0.006 | 3.15E-01 | ASXL2  |
| ILMN_1725175 | FOSL2    | rs780093   | T | 0.39 | 0.002  | 0.005 | 7.10E-01 | -0.002 | 0.006 | 7.85E-01 | -0.006 | 0.006 | 3.18E-01 | GCKR   |
| ILMN_1728445 | IGFBP1   | rs700753   | G | 0.66 | -0.002 | 0.005 | 6.57E-01 | 0.002  | 0.005 | 6.66E-01 | 0.005  | 0.005 | 3.19E-01 | TNS3   |
| ILMN_1707689 | FAM59B   | rs934073   | G | 0.29 | 0.006  | 0.008 | 4.64E-01 | -0.008 | 0.008 | 3.24E-01 | -0.005 | 0.007 | 4.56E-01 | ASXL2  |
| ILMN_1809267 | CLCC1    | rs646776   | T | 0.78 | 0.002  | 0.011 | 8.23E-01 | 0.011  | 0.015 | 4.50E-01 | 0.013  | 0.013 | 3.24E-01 | CELSR2 |
| ILMN_1661129 | PPP2R2C  | rs4234798  | T | 0.38 | 0.005  | 0.005 | 3.26E-01 | 0.002  | 0.005 | 6.50E-01 | 0.000  | 0.006 | 9.95E-01 | SORCS2 |
| ILMN_1707713 | CIB4     | rs780093   | T | 0.39 | 0.000  | 0.004 | 9.32E-01 | -0.004 | 0.005 | 3.27E-01 | -0.003 | 0.005 | 5.81E-01 | GCKR   |
| ILMN_1667893 | TNS3     | rs700753   | G | 0.66 | 0.009  | 0.020 | 6.66E-01 | 0.019  | 0.025 | 4.55E-01 | -0.021 | 0.021 | 3.28E-01 | TNS3   |
| ILMN_1734602 | SRRM2    | rs1065656  | G | 0.72 | 0.009  | 0.014 | 4.98E-01 | 0.015  | 0.015 | 3.29E-01 | 0.005  | 0.022 | 8.19E-01 | NUBP2  |
| ILMN_1783728 | TBRG4    | rs11977526 | G | 0.63 | -0.011 | 0.012 | 3.30E-01 | -0.009 | 0.013 | 4.80E-01 | -0.005 | 0.014 | 7.24E-01 | IGFBP3 |
| ILMN_1707077 | SORT1    | rs646776   | T | 0.78 | -0.007 | 0.016 | 6.63E-01 | 0.012  | 0.015 | 4.37E-01 | -0.018 | 0.019 | 3.35E-01 | CELSR2 |
| ILMN_1783852 | CD164    | rs2153960  | G | 0.29 | 0.008  | 0.011 | 4.57E-01 | -0.014 | 0.014 | 3.43E-01 | -0.005 | 0.007 | 4.69E-01 | FOXO3  |
| ILMN_2330170 | MYBPC1   | rs978458   | T | 0.27 | 0.002  | 0.006 | 6.60E-01 | 0.006  | 0.006 | 3.44E-01 | 0.004  | 0.015 | 7.84E-01 | IGF1   |
| ILMN_1789240 | MLST8    | rs1065656  | G | 0.72 | 0.002  | 0.011 | 8.77E-01 | -0.005 | 0.012 | 6.61E-01 | -0.014 | 0.014 | 3.47E-01 | NUBP2  |
| ILMN_1720274 | C2orf53  | rs780093   | T | 0.39 | 0.004  | 0.005 | 3.48E-01 | -0.002 | 0.005 | 7.44E-01 | -0.001 | 0.005 | 8.45E-01 | GCKR   |
| ILMN_1742179 | FNDC7    | rs646776   | T | 0.78 | 0.002  | 0.006 | 7.76E-01 | -0.006 | 0.006 | 3.49E-01 | -0.002 | 0.006 | 7.21E-01 | CELSR2 |
| ILMN_1651235 | AFAP1    | rs4234798  | T | 0.38 | 0.001  | 0.005 | 8.97E-01 | 0.005  | 0.005 | 3.49E-01 | -0.004 | 0.005 | 4.14E-01 | SORCS2 |
| ILMN_1692295 | MYO1G    | rs11977526 | G | 0.63 | -0.006 | 0.013 | 6.70E-01 | -0.005 | 0.017 | 7.64E-01 | -0.016 | 0.017 | 3.55E-01 | IGFBP3 |
| ILMN_2203073 | RNF151   | rs1065656  | G | 0.72 | 0.000  | 0.006 | 9.72E-01 | 0.004  | 0.007 | 5.96E-01 | -0.005 | 0.006 | 3.55E-01 | NUBP2  |
| ILMN_1689774 | MRFAP1L1 | rs4234798  | T | 0.38 | -0.009 | 0.010 | 3.57E-01 | -0.001 | 0.007 | 9.25E-01 | 0.010  | 0.011 | 3.69E-01 | SORCS2 |



|              |          |            |   |      |        |       |          |        |       |          |        |       |          |        |
|--------------|----------|------------|---|------|--------|-------|----------|--------|-------|----------|--------|-------|----------|--------|
| ILMN_1764230 | GNPTG    | rs1065656  | G | 0.72 | -0.001 | 0.017 | 9.31E-01 | 0.016  | 0.018 | 3.60E-01 | -0.008 | 0.018 | 6.54E-01 | NUBP2  |
| ILMN_2396875 | IGFBP3   | rs11977526 | G | 0.63 | -0.018 | 0.020 | 3.64E-01 | 0.003  | 0.006 | 6.36E-01 | 0.022  | 0.025 | 3.80E-01 | IGFBP3 |
| ILMN_1768483 | KCNK3    | rs934073   | G | 0.29 | 0.002  | 0.006 | 8.02E-01 | 0.002  | 0.007 | 7.89E-01 | 0.006  | 0.007 | 3.69E-01 | ASXL2  |
| ILMN_1795557 | SNX3     | rs2153960  | G | 0.29 | -0.001 | 0.005 | 8.80E-01 | -0.005 | 0.006 | 3.74E-01 | 0.004  | 0.006 | 5.02E-01 | FOXO3  |
| ILMN_1653056 | ATP6VOC  | rs1065656  | G | 0.72 | 0.003  | 0.005 | 5.42E-01 | 0.000  | 0.007 | 9.40E-01 | -0.006 | 0.007 | 3.74E-01 | NUBP2  |
| ILMN_2205785 | AKNAD1   | rs646776   | T | 0.78 | 0.002  | 0.006 | 7.66E-01 | 0.001  | 0.006 | 8.18E-01 | -0.006 | 0.006 | 3.82E-01 | CELSR2 |
| ILMN_1810474 | UBE2I    | rs1065656  | G | 0.72 | -0.006 | 0.010 | 5.36E-01 | 0.009  | 0.010 | 3.82E-01 | -0.009 | 0.014 | 5.06E-01 | NUBP2  |
| ILMN_1693702 | MRFAP1L1 | rs4234798  | T | 0.38 | 0.006  | 0.007 | 4.59E-01 | 0.007  | 0.009 | 4.59E-01 | -0.008 | 0.009 | 3.84E-01 | SORCS2 |
| ILMN_2414848 | TBRG4    | rs11977526 | G | 0.63 | 0.003  | 0.010 | 7.97E-01 | 0.009  | 0.010 | 3.97E-01 | 0.002  | 0.015 | 9.15E-01 | IGFBP3 |
| ILMN_1716979 | GSTM4    | rs646776   | T | 0.78 | 0.010  | 0.012 | 4.00E-01 | -0.004 | 0.022 | 8.44E-01 | 0.000  | 0.009 | 9.86E-01 | CELSR2 |
| ILMN_1809047 | TBRG4    | rs11977526 | G | 0.63 | 0.004  | 0.006 | 4.45E-01 | 0.000  | 0.015 | 9.76E-01 | 0.006  | 0.007 | 4.00E-01 | IGFBP3 |
| ILMN_1772719 | GPN1     | rs780093   | T | 0.39 | -0.009 | 0.011 | 4.07E-01 | -0.005 | 0.008 | 5.60E-01 | -0.009 | 0.011 | 4.03E-01 | GCKR   |
| ILMN_1654945 | DNMT3A   | rs934073   | G | 0.29 | 0.001  | 0.006 | 8.33E-01 | 0.000  | 0.011 | 9.66E-01 | -0.006 | 0.007 | 4.09E-01 | ASXL2  |
| ILMN_1752075 | MYBPC1   | rs978458   | T | 0.27 | -0.005 | 0.006 | 4.15E-01 | 0.003  | 0.007 | 6.88E-01 | -0.003 | 0.022 | 8.92E-01 | IGF1   |
| ILMN_2065745 | RAMP3    | rs11977526 | G | 0.63 | -0.020 | 0.025 | 4.20E-01 | 0.000  | 0.005 | 9.69E-01 | 0.003  | 0.020 | 8.84E-01 | IGFBP3 |
| ILMN_1736757 | GNPTAB   | rs978458   | T | 0.27 | -0.002 | 0.013 | 8.78E-01 | -0.006 | 0.018 | 7.20E-01 | 0.015  | 0.019 | 4.24E-01 | IGF1   |
| ILMN_2392472 | CENPA    | rs780093   | T | 0.39 | -0.001 | 0.006 | 8.67E-01 | 0.011  | 0.018 | 5.29E-01 | -0.006 | 0.008 | 4.30E-01 | GCKR   |
| ILMN_1791069 | ZNF513   | rs780093   | T | 0.39 | 0.003  | 0.006 | 6.65E-01 | -0.002 | 0.008 | 7.88E-01 | -0.008 | 0.011 | 4.34E-01 | GCKR   |
| ILMN_1747084 | FLJ42177 | rs2153960  | G | 0.29 | 0.000  | 0.005 | 9.77E-01 | 0.004  | 0.005 | 4.37E-01 | 0.004  | 0.005 | 4.42E-01 | FOXO3  |
| ILMN_1774722 | CGREF1   | rs780093   | T | 0.39 | 0.004  | 0.005 | 4.41E-01 | 0.002  | 0.006 | 6.86E-01 | -0.004 | 0.005 | 4.59E-01 | GCKR   |
| ILMN_1768483 | KCNK3    | rs780093   | T | 0.39 | -0.004 | 0.006 | 4.42E-01 | 0.004  | 0.006 | 5.03E-01 | 0.000  | 0.006 | 9.97E-01 | GCKR   |
| ILMN_2412046 | TRIM54   | rs780093   | T | 0.39 | 0.004  | 0.005 | 4.59E-01 | 0.002  | 0.005 | 6.74E-01 | -0.004 | 0.006 | 4.90E-01 | GCKR   |
| ILMN_2191902 | ALX3     | rs646776   | T | 0.78 | -0.001 | 0.006 | 8.29E-01 | -0.005 | 0.006 | 4.65E-01 | 0.004  | 0.006 | 5.47E-01 | CELSR2 |
| ILMN_2056087 | IGF1     | rs978458   | T | 0.27 | 0.006  | 0.017 | 7.31E-01 | 0.004  | 0.008 | 5.75E-01 | -0.004 | 0.006 | 4.78E-01 | IGF1   |
| ILMN_1708957 | MYBPC1   | rs978458   | T | 0.27 | 0.002  | 0.007 | 7.47E-01 | -0.002 | 0.009 | 8.31E-01 | -0.005 | 0.007 | 4.94E-01 | IGF1   |
| ILMN_1680507 | PPP2R2C  | rs4234798  | T | 0.38 | -0.004 | 0.005 | 4.99E-01 | -0.002 | 0.005 | 7.36E-01 | -0.016 | 0.023 | 4.95E-01 | SORCS2 |
| ILMN_1773758 | PDPK1    | rs1065656  | G | 0.72 | -0.004 | 0.007 | 5.01E-01 | -0.001 | 0.007 | 9.29E-01 | -0.004 | 0.007 | 5.34E-01 | NUBP2  |
| ILMN_1692707 | C2orf79  | rs934073   | G | 0.29 | -0.007 | 0.010 | 5.02E-01 | 0.002  | 0.014 | 8.61E-01 | -0.003 | 0.014 | 8.41E-01 | ASXL2  |
| ILMN_1755111 | C6orf199 | rs2153960  | G | 0.29 | -0.003 | 0.006 | 6.53E-01 | 0.002  | 0.008 | 7.45E-01 | 0.004  | 0.007 | 5.13E-01 | FOXO3  |
| ILMN_1725529 | UBE2I    | rs1065656  | G | 0.72 | 0.000  | 0.006 | 9.57E-01 | -0.004 | 0.007 | 6.10E-01 | 0.004  | 0.006 | 5.16E-01 | NUBP2  |
| ILMN_1712751 | HADHA    | rs934073   | G | 0.29 | 0.014  | 0.021 | 5.17E-01 | -0.005 | 0.018 | 7.86E-01 | 0.005  | 0.021 | 8.15E-01 | ASXL2  |
| ILMN_2401344 | PPP2R2C  | rs4234798  | T | 0.38 | 0.003  | 0.006 | 5.82E-01 | -0.004 | 0.007 | 5.48E-01 | -0.004 | 0.024 | 8.61E-01 | SORCS2 |
| ILMN_1679279 | SYPL2    | rs646776   | T | 0.78 | -0.002 | 0.008 | 8.18E-01 | 0.004  | 0.008 | 5.54E-01 | 0.000  | 0.009 | 9.82E-01 | CELSR2 |
| ILMN_2363489 | BRE      | rs780093   | T | 0.39 | -0.006 | 0.010 | 5.55E-01 | 0.006  | 0.011 | 6.07E-01 | 0.003  | 0.014 | 8.10E-01 | GCKR   |
| ILMN_2094294 | NR2E1    | rs2153960  | G | 0.29 | 0.002  | 0.005 | 7.72E-01 | 0.003  | 0.006 | 5.58E-01 | 0.001  | 0.006 | 8.16E-01 | FOXO3  |
| ILMN_1672899 | POMC     | rs934073   | G | 0.29 | -0.001 | 0.006 | 8.25E-01 | -0.003 | 0.011 | 7.60E-01 | 0.003  | 0.007 | 6.07E-01 | ASXL2  |
| ILMN_1692826 | UNKL     | rs1065656  | G | 0.72 | 0.008  | 0.017 | 6.37E-01 | -0.009 | 0.017 | 6.10E-01 | 0.006  | 0.016 | 7.24E-01 | NUBP2  |
| ILMN_1734290 | MAPRE3   | rs780093   | T | 0.39 | 0.003  | 0.013 | 8.35E-01 | 0.005  | 0.010 | 6.34E-01 | 0.003  | 0.014 | 8.18E-01 | GCKR   |
| ILMN_1807972 | MICAL1   | rs2153960  | G | 0.29 | -0.002 | 0.021 | 9.11E-01 | 0.010  | 0.021 | 6.39E-01 | -0.008 | 0.022 | 7.27E-01 | FOXO3  |
| ILMN_1720287 | E4F1     | rs1065656  | G | 0.72 | 0.005  | 0.015 | 7.59E-01 | 0.001  | 0.013 | 9.41E-01 | 0.009  | 0.020 | 6.41E-01 | NUBP2  |
| ILMN_1736929 | PLB1     | rs780093   | T | 0.39 | -0.002 | 0.005 | 6.75E-01 | -0.003 | 0.006 | 6.55E-01 | -0.002 | 0.007 | 7.91E-01 | GCKR   |
| ILMN_1785785 | NCOA1    | rs934073   | G | 0.29 | 0.003  | 0.007 | 7.02E-01 | 0.006  | 0.013 | 6.60E-01 | 0.000  | 0.010 | 9.68E-01 | ASXL2  |

|              |         |            |   |      |        |       |          |        |       |          |        |       |          |        |
|--------------|---------|------------|---|------|--------|-------|----------|--------|-------|----------|--------|-------|----------|--------|
| ILMN_2191940 | SPIC    | rs978458   | T | 0.27 | 0.001  | 0.005 | 7.94E-01 | -0.002 | 0.006 | 6.75E-01 | -0.002 | 0.006 | 8.06E-01 | IGF1   |
| ILMN_1768055 | GFER    | rs1065656  | G | 0.72 | 0.004  | 0.011 | 7.02E-01 | NA     | NA    | NA       | NA     | NA    | NA       | NUBP2  |
| ILMN_1780840 | C2orf16 | rs780093   | T | 0.39 | 0.001  | 0.005 | 8.78E-01 | 0.000  | 0.006 | 9.39E-01 | -0.002 | 0.005 | 7.03E-01 | GCKR   |
| ILMN_1719661 | SEPX1   | rs1065656  | G | 0.72 | -0.006 | 0.016 | 7.07E-01 | 0.000  | 0.018 | 9.82E-01 | -0.004 | 0.028 | 8.81E-01 | NUBP2  |
| ILMN_2120555 | ADCY1   | rs11977526 | G | 0.63 | 0.001  | 0.010 | 9.29E-01 | -0.006 | 0.017 | 7.15E-01 | -0.002 | 0.008 | 8.22E-01 | IGFBP3 |
| ILMN_1780197 | TBC1D24 | rs1065656  | G | 0.72 | -0.001 | 0.006 | 7.93E-01 | 0.001  | 0.006 | 8.26E-01 | 0.002  | 0.006 | 7.29E-01 | NUBP2  |
| ILMN_1717888 | KHK     | rs780093   | T | 0.39 | -0.001 | 0.005 | 7.88E-01 | 0.001  | 0.006 | 8.67E-01 | -0.001 | 0.006 | 8.16E-01 | GCKR   |

Results are ordered by minimum p-value across all tissues.

Significant results after Bonferroni correction are marked in bold.

**Supplementary Table 7: Results of gene expression analysis of the genome-wide significant**

**loci with IGF-1 and IGFBP-3 in the SHIP-TREND cohort**

| Trait  | Probe Name | Gene Name | beta      | SE       | p-value  | FDR             | log2 Mean Intensity | GWAS Locus |
|--------|------------|-----------|-----------|----------|----------|-----------------|---------------------|------------|
| IGFBP3 | 5870328    | RPS2      | -3.88E-05 | 8.04E-06 | 1.64E-06 | <b>5.30E-04</b> | 13.97               | NUBP2      |
| IGFBP3 | 4900333    | HAGH      | 8.68E-05  | 2.15E-05 | 6.00E-05 | <b>9.69E-03</b> | 10.69               | NUBP2      |
| IGFBP3 | 770554     | RPS2      | -3.76E-05 | 1.01E-05 | 2.04E-04 | <b>2.19E-02</b> | 12.33               | NUBP2      |
| IGFBP3 | 1780356    | HAGH      | 8.70E-05  | 2.42E-05 | 3.45E-04 | <b>2.79E-02</b> | 8.89                | NUBP2      |
| IGFBP3 | 2370341    | RPS2      | -3.23E-05 | 9.15E-06 | 4.31E-04 | <b>2.79E-02</b> | 13.70               | NUBP2      |
| IGF1   | 1440243    | SEPX1     | 8.38E-04  | 2.48E-04 | 7.50E-04 | <b>4.04E-02</b> | 12.70               | NUBP2      |
| IGF1   | 3610722    | GPSM2     | 5.75E-04  | 1.76E-04 | 1.10E-03 | 5.08E-02        | 6.97                | CELSR2     |
| IGFBP3 | 6200243    | PGP       | -2.42E-05 | 7.53E-06 | 1.33E-03 | 5.39E-02        | 6.59                | NUBP2      |
| IGF1   | 5870328    | RPS2      | -5.43E-04 | 1.73E-04 | 1.72E-03 | 6.18E-02        | 13.97               | NUBP2      |
| IGF1   | 830605     | CCDC121   | -3.27E-04 | 1.06E-04 | 2.04E-03 | 6.60E-02        | 6.23                | GCKR       |
| IGFBP3 | 2070184    | NTHL1     | -2.15E-05 | 7.07E-06 | 2.44E-03 | 7.15E-02        | 6.34                | NUBP2      |
| IGF1   | 2630022    | RNPS1     | -5.28E-04 | 1.81E-04 | 3.52E-03 | 9.46E-02        | 9.00                | NUBP2      |
| IGFBP3 | 6450424    | NME3      | -2.32E-05 | 8.28E-06 | 5.24E-03 | 1.21E-01        | 8.69                | NUBP2      |
| IGF1   | 6900592    | GSTM4     | 4.06E-04  | 1.44E-04 | 5.08E-03 | 1.21E-01        | 6.21                | CELSR2     |
| IGF1   | 770554     | RPS2      | -5.71E-04 | 2.16E-04 | 8.35E-03 | 1.59E-01        | 12.33               | NUBP2      |
| IGFBP3 | 3710215    | MLST8     | -2.13E-05 | 8.01E-06 | 8.10E-03 | 1.59E-01        | 6.84                | NUBP2      |
| IGFBP3 | 4890056    | C16ORF91  | -2.13E-05 | 8.00E-06 | 7.78E-03 | 1.59E-01        | 7.26                | NUBP2      |
| IGF1   | 3140008    | PPM1G     | -4.42E-04 | 1.71E-04 | 1.00E-02 | 1.70E-01        | 9.69                | GCKR       |
| IGFBP3 | 3370497    | TSC2      | 1.18E-05  | 4.54E-06 | 9.52E-03 | 1.70E-01        | 6.15                | NUBP2      |
| IGF1   | 3890544    | NUP37     | -4.42E-04 | 1.75E-04 | 1.17E-02 | 1.90E-01        | 8.18                | IGF1       |
| IGF1   | 7570671    | UNKL      | 4.60E-04  | 1.84E-04 | 1.28E-02 | 1.96E-01        | 6.85                | NUBP2      |
| IGF1   | 6560338    | ZNF512    | -4.72E-04 | 1.96E-04 | 1.62E-02 | 2.29E-01        | 9.26                | GCKR       |
| IGF1   | 4150553    | TAF13     | 2.56E-04  | 1.06E-04 | 1.63E-02 | 2.29E-01        | 6.19                | CELSR2     |
| IGF1   | 6450424    | NME3      | -4.16E-04 | 1.77E-04 | 1.88E-02 | 2.53E-01        | 8.69                | NUBP2      |
| IGF1   | 5570594    | STXBP3    | 5.41E-04  | 2.32E-04 | 2.00E-02 | 2.58E-01        | 7.71                | CELSR2     |
| IGFBP3 | 1240612    | MAPK8IP3  | -1.20E-05 | 5.23E-06 | 2.14E-02 | 2.66E-01        | 6.02                | NUBP2      |
| IGF1   | 6370494    | EIF2B4    | -3.37E-04 | 1.50E-04 | 2.48E-02 | 2.97E-01        | 8.62                | GCKR       |
| IGF1   | 4220576    | SLC4A1AP  | 3.33E-04  | 1.50E-04 | 2.69E-02 | 3.11E-01        | 6.40                | GCKR       |
| IGFBP3 | 5080451    | PSMA5     | -1.99E-05 | 9.03E-06 | 2.80E-02 | 3.12E-01        | 9.39                | CELSR2     |
| IGFBP3 | 3940138    | PKD1      | -1.88E-05 | 8.67E-06 | 3.07E-02 | 3.31E-01        | 6.93                | NUBP2      |
| IGFBP3 | 6060592    | GNAI3     | 2.67E-05  | 1.28E-05 | 3.69E-02 | 3.84E-01        | 7.95                | CELSR2     |
| IGF1   | 870484     | LACE1     | -2.19E-04 | 1.07E-04 | 4.04E-02 | 3.87E-01        | 6.12                | FOXO3      |
| IGF1   | 6940132    | AMPD2     | 2.28E-04  | 1.12E-04 | 4.17E-02 | 3.87E-01        | 6.09                | CELSR2     |
| IGFBP3 | 160019     | SORT1     | -2.33E-05 | 1.13E-05 | 3.94E-02 | 3.87E-01        | 7.69                | CELSR2     |
| IGFBP3 | 3130241    | TMEM167B  | -1.89E-05 | 9.29E-06 | 4.19E-02 | 3.87E-01        | 8.32                | CELSR2     |
| IGF1   | 6840215    | ECT2      | -3.51E-04 | 1.74E-04 | 4.43E-02 | 3.97E-01        | 6.72                | GHSR       |
| IGFBP3 | 5270575    | MAPK8IP3  | -1.69E-05 | 8.52E-06 | 4.75E-02 | 4.04E-01        | 8.62                | NUBP2      |

|        |         |             |           |          |          |          |       |        |
|--------|---------|-------------|-----------|----------|----------|----------|-------|--------|
| IGF1   | 5080451 | PSMA5       | -3.84E-04 | 1.93E-04 | 4.66E-02 | 4.04E-01 | 9.39  | CELSR2 |
| IGFBP3 | 5340066 | CRAMP1L     | -1.57E-05 | 8.03E-06 | 5.16E-02 | 4.28E-01 | 6.98  | NUBP2  |
| IGF1   | 6960059 | GCKR        | -2.18E-04 | 1.13E-04 | 5.32E-02 | 4.30E-01 | 6.34  | GCKR   |
| IGF1   | 6060592 | GNAI3       | 5.16E-04  | 2.72E-04 | 5.84E-02 | 4.60E-01 | 7.95  | CELSR2 |
| IGFBP3 | 2100079 | ECI1        | -1.55E-05 | 8.25E-06 | 6.11E-02 | 4.70E-01 | 6.55  | NUBP2  |
| IGFBP3 | 7000035 | HS3ST6      | 1.13E-05  | 6.06E-06 | 6.33E-02 | 4.73E-01 | 6.22  | NUBP2  |
| IGF1   | 7550138 | SYPL2       | 2.10E-04  | 1.13E-04 | 6.44E-02 | 4.73E-01 | 6.06  | CELSR2 |
| IGF1   | 3130286 | no GeneName | -1.91E-04 | 1.04E-04 | 6.66E-02 | 4.78E-01 | 6.15  | CELSR2 |
| IGF1   | 990136  | C12ORF48    | -2.23E-04 | 1.22E-04 | 6.90E-02 | 4.85E-01 | 6.21  | IGF1   |
| IGF1   | 1710332 | FAHD1       | -1.93E-04 | 1.07E-04 | 7.20E-02 | 4.85E-01 | 6.17  | NUBP2  |
| IGF1   | 6650168 | NR2E1       | -1.91E-04 | 1.06E-04 | 7.18E-02 | 4.85E-01 | 6.20  | FOXO3  |
| IGF1   | 5360026 | no GeneName | -1.95E-04 | 1.09E-04 | 7.37E-02 | 4.86E-01 | 6.30  | ASXL2  |
| IGF1   | 3800025 | C2ORF28     | -3.14E-04 | 1.78E-04 | 7.85E-02 | 5.07E-01 | 8.64  | GCKR   |
| IGF1   | 20338   | NOXO1       | 2.91E-04  | 1.73E-04 | 9.28E-02 | 5.11E-01 | 6.24  | NUBP2  |
| IGF1   | 2230626 | MRPL33      | -3.65E-04 | 2.17E-04 | 9.33E-02 | 5.11E-01 | 8.13  | GCKR   |
| IGF1   | 430402  | ABCA3       | 1.74E-04  | 1.04E-04 | 9.25E-02 | 5.11E-01 | 6.13  | NUBP2  |
| IGF1   | 5570494 | MRPL33      | -3.23E-04 | 1.89E-04 | 8.87E-02 | 5.11E-01 | 10.00 | GCKR   |
| IGF1   | 6770341 | PMCH        | -1.82E-04 | 1.06E-04 | 8.58E-02 | 5.11E-01 | 6.16  | IGF1   |
| IGFBP3 | 4610201 | SNORA10     | 2.08E-05  | 1.22E-05 | 8.77E-02 | 5.11E-01 | 7.25  | NUBP2  |
| IGFBP3 | 580270  | NOXO1       | 8.75E-06  | 5.07E-06 | 8.46E-02 | 5.11E-01 | 6.14  | NUBP2  |
| IGF1   | 1070762 | PSRC1       | 2.71E-04  | 1.59E-04 | 8.75E-02 | 5.11E-01 | 6.58  | CELSR2 |
| IGFBP3 | 3710240 | CELSR2      | -8.11E-06 | 4.69E-06 | 8.45E-02 | 5.11E-01 | 6.04  | CELSR2 |
| IGF1   | 6900367 | BRE         | -1.70E-04 | 1.02E-04 | 9.66E-02 | 5.16E-01 | 6.23  | GCKR   |
| IGFBP3 | 2760601 | C16ORF73    | -8.11E-06 | 4.91E-06 | 9.85E-02 | 5.16E-01 | 6.19  | NUBP2  |
| IGFBP3 | 520609  | KIAA1324    | -3.76E-05 | 2.28E-05 | 9.90E-02 | 5.16E-01 | 7.63  | CELSR2 |
| IGF1   | 3520711 | MPV17       | -2.92E-04 | 1.78E-04 | 1.01E-01 | 5.18E-01 | 7.43  | GCKR   |
| IGF1   | 2030070 | ZNF598      | -2.92E-04 | 1.81E-04 | 1.08E-01 | 5.21E-01 | 8.17  | NUBP2  |
| IGF1   | 2370341 | RPS2        | -3.17E-04 | 1.96E-04 | 1.06E-01 | 5.21E-01 | 13.70 | NUBP2  |
| IGFBP3 | 450161  | FAHD1       | 1.75E-05  | 1.08E-05 | 1.07E-01 | 5.21E-01 | 6.95  | NUBP2  |
| IGFBP3 | 4060707 | GSTM4;GSTM2 | -8.72E-06 | 5.38E-06 | 1.05E-01 | 5.21E-01 | 6.23  | CELSR2 |
| IGF1   | 60220   | C16ORF79    | 2.27E-04  | 1.43E-04 | 1.13E-01 | 5.30E-01 | 6.58  | NUBP2  |
| IGFBP3 | 3610722 | GPSM2       | 1.31E-05  | 8.27E-06 | 1.13E-01 | 5.30E-01 | 6.97  | CELSR2 |
| IGF1   | 3360468 | SNX17       | -2.40E-04 | 1.53E-04 | 1.17E-01 | 5.30E-01 | 9.66  | GCKR   |
| IGFBP3 | 610592  | ADCY1       | 8.11E-06  | 5.16E-06 | 1.16E-01 | 5.30E-01 | 6.29  | IGFBP3 |
| IGF1   | 6040026 | GHSR        | -2.06E-04 | 1.33E-04 | 1.20E-01 | 5.38E-01 | 6.26  | GHSR   |
| IGF1   | 2140064 | GTF3C2      | -2.69E-04 | 1.77E-04 | 1.30E-01 | 5.45E-01 | 8.71  | GCKR   |
| IGF1   | 3710215 | MLST8       | -2.63E-04 | 1.71E-04 | 1.25E-01 | 5.45E-01 | 6.84  | NUBP2  |
| IGF1   | 5570047 | GHSR        | -1.93E-04 | 1.27E-04 | 1.30E-01 | 5.45E-01 | 6.15  | GHSR   |
| IGFBP3 | 4230301 | PGP         | 1.04E-05  | 6.81E-06 | 1.28E-01 | 5.45E-01 | 6.66  | NUBP2  |
| IGFBP3 | 5910528 | DNASE1L2    | 8.12E-06  | 5.27E-06 | 1.24E-01 | 5.45E-01 | 6.28  | NUBP2  |
| IGFBP3 | 7150598 | GSTM3       | 1.61E-05  | 1.07E-05 | 1.32E-01 | 5.48E-01 | 6.53  | CELSR2 |
| IGF1   | 3370497 | TSC2        | 1.39E-04  | 9.70E-05 | 1.51E-01 | 5.74E-01 | 6.15  | NUBP2  |

|        |         |          |           |          |          |          |      |        |
|--------|---------|----------|-----------|----------|----------|----------|------|--------|
| IGF1   | 4060332 | IGF1     | 1.66E-04  | 1.14E-04 | 1.44E-01 | 5.74E-01 | 6.30 | IGF1   |
| IGF1   | 4260446 | NR2E1    | 2.17E-04  | 1.52E-04 | 1.53E-01 | 5.74E-01 | 6.51 | FOXO3  |
| IGF1   | 430239  | NRBP1    | 2.79E-04  | 1.94E-04 | 1.52E-01 | 5.74E-01 | 6.84 | GCKR   |
| IGF1   | 5960546 | EIF2B4   | -2.35E-04 | 1.63E-04 | 1.51E-01 | 5.74E-01 | 9.09 | GCKR   |
| IGFBP3 | 2030730 | UBE2I    | -1.11E-05 | 7.65E-06 | 1.46E-01 | 5.74E-01 | 9.76 | NUBP2  |
| IGF1   | 2940554 | GSTM5    | -1.54E-04 | 1.06E-04 | 1.46E-01 | 5.74E-01 | 6.17 | CELSR2 |
| IGF1   | 4730598 | AMIGO1   | 1.67E-04  | 1.16E-04 | 1.51E-01 | 5.74E-01 | 6.19 | CELSR2 |
| IGF1   | 290332  | TAF13    | -1.45E-04 | 1.02E-04 | 1.55E-01 | 5.74E-01 | 6.25 | CELSR2 |
| IGF1   | 1300592 | DNMT3A   | -1.96E-04 | 1.38E-04 | 1.56E-01 | 5.74E-01 | 6.55 | ASXL2  |
| IGF1   | 2230377 | TELO2    | 1.85E-04  | 1.36E-04 | 1.76E-01 | 5.78E-01 | 6.42 | NUBP2  |
| IGF1   | 4200209 | RBKS     | 1.97E-04  | 1.48E-04 | 1.82E-01 | 5.78E-01 | 6.48 | GCKR   |
| IGF1   | 4490097 | SPATA16  | 1.47E-04  | 1.10E-04 | 1.82E-01 | 5.78E-01 | 6.10 | GHSR   |
| IGF1   | 4610201 | SNORA10  | -3.61E-04 | 2.60E-04 | 1.65E-01 | 5.78E-01 | 7.25 | NUBP2  |
| IGF1   | 4920138 | FOXO3    | -1.46E-04 | 1.09E-04 | 1.80E-01 | 5.78E-01 | 6.11 | FOXO3  |
| IGF1   | 5260162 | FOXO3    | 1.73E-04  | 1.29E-04 | 1.78E-01 | 5.78E-01 | 6.17 | FOXO3  |
| IGF1   | 6860528 | CASKIN1  | -1.49E-04 | 1.07E-04 | 1.64E-01 | 5.78E-01 | 6.12 | NUBP2  |
| IGFBP3 | 1510468 | GRPEL1   | -1.04E-05 | 7.80E-06 | 1.82E-01 | 5.78E-01 | 7.85 | SORCS2 |
| IGFBP3 | 290392  | RNPS1    | -1.12E-05 | 8.32E-06 | 1.80E-01 | 5.78E-01 | 7.18 | NUBP2  |
| IGFBP3 | 6840372 | IGFBP3   | -7.50E-06 | 5.49E-06 | 1.72E-01 | 5.78E-01 | 6.22 | IGFBP3 |
| IGFBP3 | 6940050 | RNF151   | -7.08E-06 | 5.05E-06 | 1.62E-01 | 5.78E-01 | 6.02 | NUBP2  |
| IGFBP3 | 7210397 | GNPTG    | -1.11E-05 | 8.15E-06 | 1.74E-01 | 5.78E-01 | 7.52 | NUBP2  |
| IGF1   | 1710577 | GPR61    | 1.70E-04  | 1.21E-04 | 1.60E-01 | 5.78E-01 | 6.08 | CELSR2 |
| IGFBP3 | 1230577 | GNAT2    | 7.70E-06  | 5.77E-06 | 1.83E-01 | 5.78E-01 | 6.28 | CELSR2 |
| IGF1   | 650075  | ASXL2    | 2.75E-04  | 2.08E-04 | 1.86E-01 | 5.84E-01 | 9.11 | ASXL2  |
| IGF1   | 2060088 | CLCN7    | -2.71E-04 | 2.15E-04 | 2.07E-01 | 6.17E-01 | 9.93 | NUBP2  |
| IGF1   | 3870241 | DNAJC5G  | -1.64E-04 | 1.30E-04 | 2.08E-01 | 6.17E-01 | 6.17 | GCKR   |
| IGF1   | 6060288 | PKD1     | -1.37E-04 | 1.09E-04 | 2.08E-01 | 6.17E-01 | 6.40 | NUBP2  |
| IGF1   | 6580110 | PAH      | -1.27E-04 | 1.01E-04 | 2.10E-01 | 6.17E-01 | 6.11 | IGF1   |
| IGF1   | 7040544 | CCDC53   | -2.45E-04 | 1.92E-04 | 2.01E-01 | 6.17E-01 | 8.10 | IGF1   |
| IGFBP3 | 5890382 | PTX4     | -7.80E-06 | 6.12E-06 | 2.03E-01 | 6.17E-01 | 6.28 | NUBP2  |
| IGF1   | 1070292 | GPSM2    | 1.62E-04  | 1.26E-04 | 1.99E-01 | 6.17E-01 | 6.40 | CELSR2 |
| IGF1   | 2680438 | C2ORF28  | -2.15E-04 | 1.75E-04 | 2.19E-01 | 6.26E-01 | 9.24 | GCKR   |
| IGF1   | 6220026 | MAPRE3   | 2.02E-04  | 1.63E-04 | 2.16E-01 | 6.26E-01 | 6.89 | GCKR   |
| IGFBP3 | 430437  | HN1L     | 7.73E-06  | 6.29E-06 | 2.20E-01 | 6.26E-01 | 6.18 | NUBP2  |
| IGFBP3 | 3130605 | AKNAD1   | 6.08E-06  | 4.97E-06 | 2.21E-01 | 6.26E-01 | 6.15 | CELSR2 |
| IGFBP3 | 2600240 | RAB26    | 6.38E-06  | 5.34E-06 | 2.32E-01 | 6.53E-01 | 6.22 | NUBP2  |
| IGF1   | 1850075 | AGBL5    | 2.14E-04  | 1.82E-04 | 2.39E-01 | 6.59E-01 | 7.00 | GCKR   |
| IGF1   | 4230301 | PGP      | 1.71E-04  | 1.45E-04 | 2.39E-01 | 6.59E-01 | 6.66 | NUBP2  |
| IGFBP3 | 4230739 | SORCS2   | -5.55E-06 | 4.78E-06 | 2.46E-01 | 6.71E-01 | 5.97 | SORCS2 |
| IGFBP3 | 4490735 | KIAA0232 | 1.10E-05  | 9.61E-06 | 2.51E-01 | 6.71E-01 | 7.00 | SORCS2 |
| IGFBP3 | 6110307 | MRPS34   | -6.03E-06 | 5.25E-06 | 2.51E-01 | 6.71E-01 | 6.23 | NUBP2  |
| IGFBP3 | 650563  | FAHD1    | 1.12E-05  | 9.75E-06 | 2.49E-01 | 6.71E-01 | 6.68 | NUBP2  |

|        |         |             |           |          |          |          |      |        |
|--------|---------|-------------|-----------|----------|----------|----------|------|--------|
| IGF1   | 5340220 | MYBPHL      | -1.17E-04 | 1.02E-04 | 2.54E-01 | 6.73E-01 | 6.03 | CELSR2 |
| IGF1   | 3440601 | CLCC1       | -1.17E-04 | 1.03E-04 | 2.57E-01 | 6.75E-01 | 6.13 | CELSR2 |
| IGF1   | 4230047 | NOXO1       | -1.26E-04 | 1.12E-04 | 2.61E-01 | 6.76E-01 | 6.35 | NUBP2  |
| IGF1   | 5690553 | HADHA       | -2.14E-04 | 1.91E-04 | 2.62E-01 | 6.76E-01 | 6.82 | ASXL2  |
| IGF1   | 3710240 | CELSR2      | -1.12E-04 | 1.00E-04 | 2.64E-01 | 6.76E-01 | 6.04 | CELSR2 |
| IGF1   | 1510152 | PSRC1       | 1.52E-04  | 1.36E-04 | 2.66E-01 | 6.76E-01 | 6.08 | CELSR2 |
| IGFBP3 | 2230377 | TELO2       | 7.04E-06  | 6.39E-06 | 2.71E-01 | 6.84E-01 | 6.42 | NUBP2  |
| IGF1   | 3310400 | IGF1        | 1.07E-04  | 9.80E-05 | 2.77E-01 | 6.93E-01 | 6.11 | IGF1   |
| IGFBP3 | 2060088 | CLCN7       | -1.07E-05 | 1.01E-05 | 2.88E-01 | 7.15E-01 | 9.93 | NUBP2  |
| IGFBP3 | 2630022 | RNPS1       | -8.96E-06 | 8.50E-06 | 2.92E-01 | 7.20E-01 | 9.00 | NUBP2  |
| IGF1   | 6370360 | RNF151      | -1.11E-04 | 1.06E-04 | 2.95E-01 | 7.21E-01 | 6.06 | NUBP2  |
| IGF1   | 1580202 | ZNF598      | 1.15E-04  | 1.11E-04 | 2.99E-01 | 7.27E-01 | 6.23 | NUBP2  |
| IGFBP3 | 1820482 | NDUFB10     | 1.36E-05  | 1.32E-05 | 3.05E-01 | 7.36E-01 | 8.26 | NUBP2  |
| IGFBP3 | 5090592 | FAHD1       | -6.23E-06 | 6.16E-06 | 3.11E-01 | 7.45E-01 | 6.08 | NUBP2  |
| IGF1   | 2030730 | UBE2I       | -1.64E-04 | 1.63E-04 | 3.16E-01 | 7.50E-01 | 9.76 | NUBP2  |
| IGF1   | 3400050 | TBL3        | -1.47E-04 | 1.49E-04 | 3.25E-01 | 7.62E-01 | 6.45 | NUBP2  |
| IGF1   | 620113  | ABHD1       | -1.16E-04 | 1.18E-04 | 3.26E-01 | 7.62E-01 | 6.15 | GCKR   |
| IGFBP3 | 6370360 | RNF151      | 4.87E-06  | 4.98E-06 | 3.28E-01 | 7.62E-01 | 6.06 | NUBP2  |
| IGFBP3 | 20630   | C1ORF194    | 4.48E-06  | 4.60E-06 | 3.31E-01 | 7.63E-01 | 6.08 | CELSR2 |
| IGF1   | 580270  | NOXO1       | -1.05E-04 | 1.08E-04 | 3.33E-01 | 7.64E-01 | 6.14 | NUBP2  |
| IGF1   | 2100079 | ECI1        | -1.67E-04 | 1.76E-04 | 3.43E-01 | 7.64E-01 | 6.55 | NUBP2  |
| IGF1   | 3940138 | PKD1        | -1.76E-04 | 1.85E-04 | 3.43E-01 | 7.64E-01 | 6.93 | NUBP2  |
| IGF1   | 5860279 | RAB10       | 2.23E-04  | 2.32E-04 | 3.36E-01 | 7.64E-01 | 9.81 | ASXL2  |
| IGFBP3 | 2710187 | ATXN7L2     | 6.63E-06  | 6.98E-06 | 3.42E-01 | 7.64E-01 | 6.55 | CELSR2 |
| IGF1   | 6760719 | EMILIN1     | -9.35E-05 | 1.01E-04 | 3.56E-01 | 7.88E-01 | 6.23 | GCKR   |
| IGFBP3 | 1710577 | GPR61       | -5.15E-06 | 5.69E-06 | 3.66E-01 | 8.04E-01 | 6.08 | CELSR2 |
| IGF1   | 2570546 | UBE2I       | 1.20E-04  | 1.35E-04 | 3.73E-01 | 8.11E-01 | 6.31 | NUBP2  |
| IGFBP3 | 2940554 | GSTM5       | -4.41E-06 | 4.96E-06 | 3.74E-01 | 8.11E-01 | 6.17 | CELSR2 |
| IGF1   | 6130131 | DNMT3A      | 1.09E-04  | 1.23E-04 | 3.77E-01 | 8.12E-01 | 6.11 | ASXL2  |
| IGFBP3 | 1580202 | ZNF598      | 4.54E-06  | 5.18E-06 | 3.81E-01 | 8.15E-01 | 6.23 | NUBP2  |
| IGFBP3 | 3990408 | TRAF7       | -4.43E-06 | 5.16E-06 | 3.90E-01 | 8.30E-01 | 6.10 | NUBP2  |
| IGF1   | 1400291 | no GeneName | 8.97E-05  | 1.11E-04 | 4.17E-01 | 8.32E-01 | 6.31 | FOXO3  |
| IGF1   | 150162  | FNDC4       | -7.46E-05 | 9.49E-05 | 4.32E-01 | 8.32E-01 | 6.24 | GCKR   |
| IGF1   | 290392  | RNPS1       | -1.49E-04 | 1.78E-04 | 4.01E-01 | 8.32E-01 | 7.18 | NUBP2  |
| IGF1   | 3870671 | SUPT7L      | -8.55E-05 | 1.07E-04 | 4.23E-01 | 8.32E-01 | 6.15 | GCKR   |
| IGF1   | 4150541 | CCDC121     | 9.55E-05  | 1.20E-04 | 4.26E-01 | 8.32E-01 | 6.21 | GCKR   |
| IGF1   | 450376  | TSC2        | 1.31E-04  | 1.66E-04 | 4.31E-01 | 8.32E-01 | 6.61 | NUBP2  |
| IGF1   | 5270575 | MAPK8IP3    | 1.46E-04  | 1.82E-04 | 4.22E-01 | 8.32E-01 | 8.62 | NUBP2  |
| IGF1   | 6110307 | MRPS34      | 8.84E-05  | 1.12E-04 | 4.31E-01 | 8.32E-01 | 6.23 | NUBP2  |
| IGFBP3 | 3390068 | E4F1        | 5.93E-06  | 7.35E-06 | 4.20E-01 | 8.32E-01 | 8.51 | NUBP2  |
| IGFBP3 | 430402  | ABCA3       | 3.94E-06  | 4.86E-06 | 4.18E-01 | 8.32E-01 | 6.13 | NUBP2  |
| IGF1   | 2680039 | CLCC1       | -7.80E-05 | 9.93E-05 | 4.33E-01 | 8.32E-01 | 6.09 | CELSR2 |

|        |         |             |           |          |          |          |      |        |
|--------|---------|-------------|-----------|----------|----------|----------|------|--------|
| IGF1   | 7150598 | GSTM3       | 1.83E-04  | 2.28E-04 | 4.22E-01 | 8.32E-01 | 6.53 | CELSR2 |
| IGFBP3 | 1070292 | GPSM2       | -4.99E-06 | 5.91E-06 | 3.99E-01 | 8.32E-01 | 6.40 | CELSR2 |
| IGFBP3 | 290332  | TAF13       | -3.92E-06 | 4.78E-06 | 4.12E-01 | 8.32E-01 | 6.25 | CELSR2 |
| IGFBP3 | 4150553 | TAF13       | 4.02E-06  | 5.00E-06 | 4.22E-01 | 8.32E-01 | 6.19 | CELSR2 |
| IGFBP3 | 70296   | AMPD2       | -4.30E-06 | 5.35E-06 | 4.22E-01 | 8.32E-01 | 6.13 | CELSR2 |
| IGFBP3 | 2030070 | ZNF598      | -6.63E-06 | 8.51E-06 | 4.36E-01 | 8.33E-01 | 8.17 | NUBP2  |
| IGF1   | 6940689 | GFER        | 1.52E-04  | 1.97E-04 | 4.39E-01 | 8.35E-01 | 6.10 | NUBP2  |
| IGFBP3 | 3290368 | IGFBP1      | -1.11E-05 | 1.45E-05 | 4.45E-01 | 8.40E-01 | 7.07 | IGFBP3 |
| IGF1   | 6450139 | FTH1P3      | 2.45E-04  | 3.23E-04 | 4.47E-01 | 8.40E-01 | 9.34 | GCKR   |
| IGF1   | 7040148 | WDR47       | 1.15E-04  | 1.55E-04 | 4.56E-01 | 8.47E-01 | 6.90 | CELSR2 |
| IGFBP3 | 1070762 | PSRC1       | -5.57E-06 | 7.45E-06 | 4.55E-01 | 8.47E-01 | 6.58 | CELSR2 |
| IGF1   | 1400743 | PMCH        | -8.50E-05 | 1.16E-04 | 4.65E-01 | 8.49E-01 | 6.31 | IGF1   |
| IGF1   | 7610201 | SNX3        | -7.79E-05 | 1.06E-04 | 4.61E-01 | 8.49E-01 | 6.22 | FOXO3  |
| IGFBP3 | 2970411 | SLC9A3R2    | -3.49E-06 | 4.76E-06 | 4.63E-01 | 8.49E-01 | 6.07 | NUBP2  |
| IGF1   | 6290050 | no GeneName | 8.57E-05  | 1.19E-04 | 4.72E-01 | 8.56E-01 | 6.29 | CELSR2 |
| IGF1   | 5050022 | KHK         | -7.91E-05 | 1.11E-04 | 4.76E-01 | 8.59E-01 | 6.28 | GCKR   |
| IGF1   | 1240612 | MAPK8IP3    | 7.54E-05  | 1.12E-04 | 5.00E-01 | 8.67E-01 | 6.02 | NUBP2  |
| IGF1   | 2370414 | C16ORF42    | 1.05E-04  | 1.56E-04 | 5.02E-01 | 8.67E-01 | 6.46 | NUBP2  |
| IGF1   | 3190746 | PAH         | -7.61E-05 | 1.12E-04 | 4.97E-01 | 8.67E-01 | 6.17 | IGF1   |
| IGF1   | 3390068 | E4F1        | -1.06E-04 | 1.57E-04 | 4.99E-01 | 8.67E-01 | 8.51 | NUBP2  |
| IGF1   | 6450048 | CCDC121     | -7.71E-05 | 1.13E-04 | 4.94E-01 | 8.67E-01 | 6.29 | GCKR   |
| IGF1   | 1230577 | GNAT2       | 8.50E-05  | 1.23E-04 | 4.90E-01 | 8.67E-01 | 6.28 | CELSR2 |
| IGFBP3 | 1170474 | AMPD2       | -4.30E-06 | 6.39E-06 | 5.01E-01 | 8.67E-01 | 6.00 | CELSR2 |
| IGFBP3 | 6020093 | SARS        | 6.71E-06  | 9.77E-06 | 4.92E-01 | 8.67E-01 | 6.68 | CELSR2 |
| IGFBP3 | 3400682 | RNPS1       | -4.16E-06 | 6.35E-06 | 5.13E-01 | 8.81E-01 | 6.51 | NUBP2  |
| IGF1   | 630427  | KHK         | 7.91E-05  | 1.25E-04 | 5.27E-01 | 8.87E-01 | 6.43 | GCKR   |
| IGF1   | 7210327 | NCEH1       | 1.11E-04  | 1.75E-04 | 5.27E-01 | 8.87E-01 | 6.87 | GHSR   |
| IGFBP3 | 3190445 | UBE2I       | -3.64E-06 | 5.76E-06 | 5.27E-01 | 8.87E-01 | 6.31 | NUBP2  |
| IGFBP3 | 3710184 | EPS8L3      | 2.87E-06  | 4.48E-06 | 5.22E-01 | 8.87E-01 | 6.19 | CELSR2 |
| IGF1   | 1470538 | ZNF513      | -6.58E-05 | 1.12E-04 | 5.57E-01 | 8.92E-01 | 6.41 | GCKR   |
| IGF1   | 2640437 | GTF3C2      | 1.16E-04  | 1.88E-04 | 5.36E-01 | 8.92E-01 | 6.74 | GCKR   |
| IGF1   | 540164  | KHK         | 6.32E-05  | 1.09E-04 | 5.61E-01 | 8.92E-01 | 6.21 | GCKR   |
| IGF1   | 6040255 | TRIM54      | -6.65E-05 | 1.15E-04 | 5.63E-01 | 8.92E-01 | 6.21 | GCKR   |
| IGF1   | 7560327 | GPN1        | -9.36E-05 | 1.53E-04 | 5.42E-01 | 8.92E-01 | 8.11 | GCKR   |
| IGF1   | 870202  | TNFSF10     | 1.69E-04  | 2.90E-04 | 5.60E-01 | 8.92E-01 | 9.93 | GHSR   |
| IGF1   | 940202  | PPM1G       | 6.79E-05  | 1.12E-04 | 5.46E-01 | 8.92E-01 | 6.14 | GCKR   |
| IGFBP3 | 2230598 | IGFALS      | -2.89E-06 | 4.81E-06 | 5.48E-01 | 8.92E-01 | 6.17 | NUBP2  |
| IGFBP3 | 2570546 | UBE2I       | 3.75E-06  | 6.34E-06 | 5.54E-01 | 8.92E-01 | 6.31 | NUBP2  |
| IGFBP3 | 6860528 | CASKIN1     | 2.89E-06  | 5.04E-06 | 5.66E-01 | 8.92E-01 | 6.12 | NUBP2  |
| IGF1   | 520609  | KIAA1324    | -2.77E-04 | 4.86E-04 | 5.69E-01 | 8.92E-01 | 7.63 | CELSR2 |
| IGF1   | 6550279 | GSTM2       | 1.03E-04  | 1.73E-04 | 5.53E-01 | 8.92E-01 | 6.59 | CELSR2 |
| IGFBP3 | 5340220 | MYBPHL      | -2.97E-06 | 4.80E-06 | 5.36E-01 | 8.92E-01 | 6.03 | CELSR2 |

|        |         |          |           |          |          |          |       |        |
|--------|---------|----------|-----------|----------|----------|----------|-------|--------|
| IGFBP3 | 6940132 | AMPD2    | -2.99E-06 | 5.25E-06 | 5.69E-01 | 8.92E-01 | 6.09  | CELSR2 |
| IGF1   | 130070  | IFT172   | 4.55E-05  | 1.04E-04 | 6.60E-01 | 8.97E-01 | 6.29  | GCKR   |
| IGF1   | 1570035 | AGBL5    | 5.25E-05  | 1.03E-04 | 6.10E-01 | 8.97E-01 | 6.15  | GCKR   |
| IGF1   | 1710152 | ARMC2    | -5.71E-05 | 1.10E-04 | 6.04E-01 | 8.97E-01 | 6.05  | FOXO3  |
| IGF1   | 2070184 | NTHL1    | -6.89E-05 | 1.51E-04 | 6.49E-01 | 8.97E-01 | 6.34  | NUBP2  |
| IGF1   | 2350706 | TRAF7    | -9.54E-05 | 1.74E-04 | 5.83E-01 | 8.97E-01 | 6.87  | NUBP2  |
| IGF1   | 2450202 | KIF3C    | -5.08E-05 | 1.03E-04 | 6.22E-01 | 8.97E-01 | 6.14  | ASXL2  |
| IGF1   | 2600240 | RAB26    | -5.47E-05 | 1.14E-04 | 6.31E-01 | 8.97E-01 | 6.22  | NUBP2  |
| IGF1   | 290435  | KRTCAP3  | 6.06E-05  | 1.39E-04 | 6.63E-01 | 8.97E-01 | 6.21  | GCKR   |
| IGF1   | 2970411 | SLC9A3R2 | -4.44E-05 | 1.01E-04 | 6.62E-01 | 8.97E-01 | 6.07  | NUBP2  |
| IGF1   | 3400682 | RNPS1    | -5.99E-05 | 1.35E-04 | 6.58E-01 | 8.97E-01 | 6.51  | NUBP2  |
| IGF1   | 5290451 | UCN      | 5.31E-05  | 1.03E-04 | 6.07E-01 | 8.97E-01 | 6.27  | GCKR   |
| IGF1   | 5340431 | TCF23    | 4.38E-05  | 9.96E-05 | 6.60E-01 | 8.97E-01 | 6.15  | GCKR   |
| IGF1   | 6200692 | FOXO3    | -1.50E-04 | 2.89E-04 | 6.04E-01 | 8.97E-01 | 11.35 | FOXO3  |
| IGF1   | 650563  | FAHD1    | 9.25E-05  | 2.08E-04 | 6.57E-01 | 8.97E-01 | 6.68  | NUBP2  |
| IGF1   | 6620403 | AGBL5    | -6.34E-05 | 1.42E-04 | 6.55E-01 | 8.97E-01 | 6.69  | GCKR   |
| IGF1   | 6940050 | RNF151   | -5.54E-05 | 1.08E-04 | 6.08E-01 | 8.97E-01 | 6.02  | NUBP2  |
| IGF1   | 6960376 | IFT140   | -6.06E-05 | 1.39E-04 | 6.64E-01 | 8.97E-01 | 6.31  | NUBP2  |
| IGF1   | 6960730 | NUBP2    | -5.46E-05 | 1.25E-04 | 6.62E-01 | 8.97E-01 | 6.36  | NUBP2  |
| IGF1   | 7000035 | HS3ST6   | 7.12E-05  | 1.29E-04 | 5.82E-01 | 8.97E-01 | 6.22  | NUBP2  |
| IGF1   | 7040689 | CGREF1   | -5.34E-05 | 1.20E-04 | 6.57E-01 | 8.97E-01 | 6.21  | GCKR   |
| IGFBP3 | 20338   | NOXO1    | -4.05E-06 | 8.12E-06 | 6.18E-01 | 8.97E-01 | 6.24  | NUBP2  |
| IGFBP3 | 2370068 | UBE2I    | -2.62E-06 | 5.13E-06 | 6.10E-01 | 8.97E-01 | 6.07  | NUBP2  |
| IGFBP3 | 2370414 | C16ORF42 | -3.37E-06 | 7.34E-06 | 6.46E-01 | 8.97E-01 | 6.46  | NUBP2  |
| IGFBP3 | 3400050 | TBL3     | -3.24E-06 | 7.01E-06 | 6.44E-01 | 8.97E-01 | 6.45  | NUBP2  |
| IGFBP3 | 450376  | TSC2     | -4.17E-06 | 7.77E-06 | 5.92E-01 | 8.97E-01 | 6.61  | NUBP2  |
| IGFBP3 | 5860609 | SYNGR3   | 2.15E-06  | 5.07E-06 | 6.72E-01 | 8.97E-01 | 6.20  | NUBP2  |
| IGFBP3 | 6060288 | PKD1     | -2.64E-06 | 5.10E-06 | 6.05E-01 | 8.97E-01 | 6.40  | NUBP2  |
| IGFBP3 | 6290097 | UNKL     | 3.07E-06  | 5.54E-06 | 5.79E-01 | 8.97E-01 | 6.35  | NUBP2  |
| IGFBP3 | 780719  | BAIAP3   | 2.51E-06  | 4.97E-06 | 6.14E-01 | 8.97E-01 | 6.13  | NUBP2  |
| IGF1   | 2710187 | ATXN7L2  | 7.43E-05  | 1.49E-04 | 6.18E-01 | 8.97E-01 | 6.55  | CELSR2 |
| IGF1   | 3610139 | GSTM1    | -2.59E-04 | 5.16E-04 | 6.16E-01 | 8.97E-01 | 6.98  | CELSR2 |
| IGFBP3 | 1510152 | PSRC1    | -2.93E-06 | 6.40E-06 | 6.47E-01 | 8.97E-01 | 6.08  | CELSR2 |
| IGFBP3 | 2680039 | CLCC1    | 2.60E-06  | 4.66E-06 | 5.78E-01 | 8.97E-01 | 6.09  | CELSR2 |
| IGFBP3 | 4730598 | AMIGO1   | -2.59E-06 | 5.47E-06 | 6.36E-01 | 8.97E-01 | 6.19  | CELSR2 |
| IGFBP3 | 5570594 | STXBP3   | -4.63E-06 | 1.09E-05 | 6.71E-01 | 8.97E-01 | 7.71  | CELSR2 |
| IGFBP3 | 7040148 | WDR47    | -3.12E-06 | 7.25E-06 | 6.67E-01 | 8.97E-01 | 6.90  | CELSR2 |
| IGF1   | 1400450 | BRE      | -5.43E-05 | 1.69E-04 | 7.48E-01 | 9.18E-01 | 7.80  | GCKR   |
| IGF1   | 1470678 | EME2     | -5.67E-05 | 1.50E-04 | 7.06E-01 | 9.18E-01 | 6.23  | NUBP2  |
| IGF1   | 1710707 | C2ORF16  | 4.62E-05  | 1.26E-04 | 7.13E-01 | 9.18E-01 | 6.30  | GCKR   |
| IGF1   | 1780356 | HAGH     | 1.70E-04  | 5.20E-04 | 7.43E-01 | 9.18E-01 | 8.89  | NUBP2  |
| IGF1   | 1990450 | CEP57L1  | 3.50E-05  | 1.04E-04 | 7.37E-01 | 9.18E-01 | 6.22  | FOXO3  |



|        |         |             |           |          |          |          |       |        |
|--------|---------|-------------|-----------|----------|----------|----------|-------|--------|
| IGF1   | 2060274 | PREB        | -6.78E-05 | 1.82E-04 | 7.09E-01 | 9.18E-01 | 6.90  | GCKR   |
| IGF1   | 2370068 | UBE2I       | -3.95E-05 | 1.09E-04 | 7.18E-01 | 9.18E-01 | 6.07  | NUBP2  |
| IGF1   | 2760601 | C16ORF73    | 3.67E-05  | 1.05E-04 | 7.26E-01 | 9.18E-01 | 6.19  | NUBP2  |
| IGF1   | 3360402 | CAD         | -4.45E-05 | 1.17E-04 | 7.04E-01 | 9.18E-01 | 6.26  | GCKR   |
| IGF1   | 4280482 | DRAM1       | 7.16E-05  | 2.04E-04 | 7.25E-01 | 9.18E-01 | 7.52  | IGF1   |
| IGF1   | 4490475 | SLC30A3     | -6.18E-05 | 1.65E-04 | 7.08E-01 | 9.18E-01 | 6.56  | GCKR   |
| IGF1   | 5340066 | CRAMP1L     | -5.67E-05 | 1.72E-04 | 7.41E-01 | 9.18E-01 | 6.98  | NUBP2  |
| IGF1   | 7650020 | NCEH1       | -6.13E-05 | 1.60E-04 | 7.01E-01 | 9.18E-01 | 6.69  | GHSR   |
| IGFBP3 | 2850433 | SPSB3       | 3.30E-06  | 8.46E-06 | 6.97E-01 | 9.18E-01 | 9.59  | NUBP2  |
| IGFBP3 | 6590132 | IGFBP3      | -2.24E-06 | 6.82E-06 | 7.42E-01 | 9.18E-01 | 6.24  | IGFBP3 |
| IGF1   | 1170474 | AMPD2       | -4.60E-05 | 1.36E-04 | 7.36E-01 | 9.18E-01 | 6.00  | CELSR2 |
| IGF1   | 160019  | SORT1       | 8.16E-05  | 2.41E-04 | 7.35E-01 | 9.18E-01 | 7.69  | CELSR2 |
| IGF1   | 3130241 | TMEM167B    | 6.43E-05  | 1.99E-04 | 7.46E-01 | 9.18E-01 | 8.32  | CELSR2 |
| IGF1   | 5910048 | EPS8L3      | -4.78E-05 | 1.36E-04 | 7.25E-01 | 9.18E-01 | 6.13  | CELSR2 |
| IGF1   | 70296   | AMPD2       | -4.23E-05 | 1.14E-04 | 7.11E-01 | 9.18E-01 | 6.13  | CELSR2 |
| IGFBP3 | 6290050 | no GeneName | 1.93E-06  | 5.59E-06 | 7.30E-01 | 9.18E-01 | 6.29  | CELSR2 |
| IGF1   | 450161  | FAHD1       | 6.95E-05  | 2.31E-04 | 7.64E-01 | 9.21E-01 | 6.95  | NUBP2  |
| IGF1   | 6450373 | DNMT3A      | 3.33E-05  | 1.09E-04 | 7.61E-01 | 9.21E-01 | 6.15  | ASXL2  |
| IGF1   | 6960615 | RPL3L       | -5.46E-05 | 1.80E-04 | 7.62E-01 | 9.21E-01 | 6.29  | NUBP2  |
| IGFBP3 | 580561  | ADCY1       | 1.64E-06  | 5.41E-06 | 7.63E-01 | 9.21E-01 | 6.17  | IGFBP3 |
| IGFBP3 | 3440601 | CLCC1       | -1.49E-06 | 4.85E-06 | 7.59E-01 | 9.21E-01 | 6.13  | CELSR2 |
| IGF1   | 5090592 | FAHD1       | -3.77E-05 | 1.31E-04 | 7.74E-01 | 9.26E-01 | 6.08  | NUBP2  |
| IGF1   | 7210397 | GNPTG       | -4.98E-05 | 1.74E-04 | 7.75E-01 | 9.26E-01 | 7.52  | NUBP2  |
| IGF1   | 4060707 | GSTM4;GSTM2 | -3.26E-05 | 1.15E-04 | 7.77E-01 | 9.26E-01 | 6.23  | CELSR2 |
| IGFBP3 | 1710332 | FAHD1       | 1.34E-06  | 5.02E-06 | 7.89E-01 | 9.32E-01 | 6.17  | NUBP2  |
| IGFBP3 | 6550279 | GSTM2       | -2.16E-06 | 8.12E-06 | 7.90E-01 | 9.32E-01 | 6.59  | CELSR2 |
| IGFBP3 | 7550138 | SYPL2       | 1.43E-06  | 5.32E-06 | 7.88E-01 | 9.32E-01 | 6.06  | CELSR2 |
| IGF1   | 20524   | C2ORF53     | 2.86E-05  | 1.09E-04 | 7.93E-01 | 9.32E-01 | 6.35  | GCKR   |
| IGF1   | 3850239 | TRIM54      | -2.76E-05 | 1.07E-04 | 7.98E-01 | 9.33E-01 | 6.07  | GCKR   |
| IGF1   | 1240553 | SESN1       | 4.37E-05  | 2.48E-04 | 8.60E-01 | 9.42E-01 | 7.56  | FOXO3  |
| IGF1   | 2230598 | IGFALS      | 2.16E-05  | 1.03E-04 | 8.33E-01 | 9.42E-01 | 6.17  | NUBP2  |
| IGF1   | 3460068 | TRIM54      | 2.38E-05  | 1.41E-04 | 8.66E-01 | 9.42E-01 | 6.41  | GCKR   |
| IGF1   | 4900333 | HAGH        | 1.02E-04  | 4.63E-04 | 8.25E-01 | 9.42E-01 | 10.69 | NUBP2  |
| IGF1   | 5050040 | SLC5A6      | 2.96E-05  | 1.55E-04 | 8.48E-01 | 9.42E-01 | 7.00  | GCKR   |
| IGF1   | 5860609 | SYNGR3      | 2.43E-05  | 1.08E-04 | 8.22E-01 | 9.42E-01 | 6.20  | NUBP2  |
| IGF1   | 5910528 | DNASE1L2    | -1.91E-05 | 1.13E-04 | 8.65E-01 | 9.42E-01 | 6.28  | NUBP2  |
| IGF1   | 6130324 | ARMC2       | -2.65E-05 | 1.25E-04 | 8.31E-01 | 9.42E-01 | 6.45  | FOXO3  |
| IGF1   | 6200243 | PGP         | -3.24E-05 | 1.61E-04 | 8.41E-01 | 9.42E-01 | 6.59  | NUBP2  |
| IGF1   | 6290097 | UNKL        | -2.61E-05 | 1.18E-04 | 8.25E-01 | 9.42E-01 | 6.35  | NUBP2  |
| IGF1   | 6590025 | UCN         | 2.57E-05  | 1.29E-04 | 8.42E-01 | 9.42E-01 | 6.12  | GCKR   |
| IGFBP3 | 1440243 | SEPX1       | 2.32E-06  | 1.17E-05 | 8.43E-01 | 9.42E-01 | 12.70 | NUBP2  |
| IGFBP3 | 6960376 | IFT140      | 1.20E-06  | 6.53E-06 | 8.55E-01 | 9.42E-01 | 6.31  | NUBP2  |

|        |         |             |           |          |          |          |       |        |
|--------|---------|-------------|-----------|----------|----------|----------|-------|--------|
| IGFBP3 | 6960615 | RPL3L       | 1.93E-06  | 8.44E-06 | 8.19E-01 | 9.42E-01 | 6.29  | NUBP2  |
| IGFBP3 | 6960730 | NUBP2       | 1.02E-06  | 5.86E-06 | 8.61E-01 | 9.42E-01 | 6.36  | NUBP2  |
| IGFBP3 | 7160707 | TBC1D14     | -2.02E-06 | 1.07E-05 | 8.50E-01 | 9.42E-01 | 9.71  | SORCS2 |
| IGFBP3 | 7210037 | IGFBP1      | -1.03E-06 | 4.68E-06 | 8.26E-01 | 9.42E-01 | 6.15  | IGFBP3 |
| IGF1   | 3130605 | AKNAD1      | 2.14E-05  | 1.06E-04 | 8.40E-01 | 9.42E-01 | 6.15  | CELSR2 |
| IGF1   | 3710184 | EPS8L3      | -1.65E-05 | 9.55E-05 | 8.63E-01 | 9.42E-01 | 6.19  | CELSR2 |
| IGFBP3 | 3610139 | GSTM1       | 5.46E-06  | 2.42E-05 | 8.22E-01 | 9.42E-01 | 6.98  | CELSR2 |
| IGFBP3 | 6900592 | GSTM4       | -1.34E-06 | 6.80E-06 | 8.43E-01 | 9.42E-01 | 6.21  | CELSR2 |
| IGF1   | 5860608 | OST4        | -4.03E-05 | 2.61E-04 | 8.77E-01 | 9.43E-01 | 9.61  | GCKR   |
| IGF1   | 6100523 | SNX3        | 3.69E-05  | 2.41E-04 | 8.79E-01 | 9.43E-01 | 11.09 | FOXO3  |
| IGF1   | 780719  | BAIAP3      | 1.67E-05  | 1.06E-04 | 8.75E-01 | 9.43E-01 | 6.13  | NUBP2  |
| IGFBP3 | 50672   | GSTM1       | -2.42E-06 | 1.52E-05 | 8.73E-01 | 9.43E-01 | 6.54  | CELSR2 |
| IGF1   | 3190445 | UBE2I       | -1.40E-05 | 1.23E-04 | 9.10E-01 | 9.45E-01 | 6.31  | NUBP2  |
| IGF1   | 3990408 | TRAF7       | -1.22E-05 | 1.10E-04 | 9.12E-01 | 9.45E-01 | 6.10  | NUBP2  |
| IGF1   | 4060292 | BRE         | -2.58E-05 | 1.78E-04 | 8.85E-01 | 9.45E-01 | 7.08  | GCKR   |
| IGF1   | 4890056 | C16ORF91    | -2.32E-05 | 1.71E-04 | 8.92E-01 | 9.45E-01 | 7.26  | NUBP2  |
| IGF1   | 6380326 | EIF2B4      | -1.22E-05 | 1.07E-04 | 9.10E-01 | 9.45E-01 | 6.25  | GCKR   |
| IGF1   | 770504  | DTNB        | 1.19E-05  | 1.02E-04 | 9.07E-01 | 9.45E-01 | 6.30  | ASXL2  |
| IGFBP3 | 1470678 | EME2        | 8.16E-07  | 7.04E-06 | 9.08E-01 | 9.45E-01 | 6.23  | NUBP2  |
| IGFBP3 | 4230047 | NOXO1       | -5.75E-07 | 5.24E-06 | 9.13E-01 | 9.45E-01 | 6.35  | NUBP2  |
| IGFBP3 | 60220   | C16ORF79    | 8.87E-07  | 6.73E-06 | 8.95E-01 | 9.45E-01 | 6.58  | NUBP2  |
| IGFBP3 | 7570671 | UNKL        | -1.14E-06 | 8.68E-06 | 8.96E-01 | 9.45E-01 | 6.85  | NUBP2  |
| IGF1   | 6020093 | SARS        | -2.92E-05 | 2.09E-04 | 8.89E-01 | 9.45E-01 | 6.68  | CELSR2 |
| IGF1   | 20630   | C1ORF194    | 9.59E-06  | 9.82E-05 | 9.22E-01 | 9.52E-01 | 6.08  | CELSR2 |
| IGFBP3 | 3130286 | no GeneName | -3.96E-07 | 4.89E-06 | 9.35E-01 | 9.62E-01 | 6.15  | CELSR2 |
| IGFBP3 | 6940689 | GFER        | -6.77E-07 | 9.24E-06 | 9.42E-01 | 9.65E-01 | 6.10  | NUBP2  |
| IGFBP3 | 5910048 | EPS8L3      | -3.82E-07 | 6.36E-06 | 9.52E-01 | 9.73E-01 | 6.13  | CELSR2 |
| IGFBP3 | 4670463 | CCDC96      | -2.10E-07 | 4.76E-06 | 9.65E-01 | 9.80E-01 | 6.27  | SORCS2 |
| IGF1   | 50672   | GSTM1       | -1.48E-05 | 3.24E-04 | 9.64E-01 | 9.80E-01 | 6.54  | CELSR2 |
| IGF1   | 2850433 | SPSB3       | 7.09E-06  | 1.80E-04 | 9.69E-01 | 9.81E-01 | 9.59  | NUBP2  |
| IGF1   | 1820482 | NDUFB10     | -2.36E-06 | 2.82E-04 | 9.93E-01 | 9.96E-01 | 8.26  | NUBP2  |
| IGF1   | 430437  | HN1L        | 1.57E-06  | 1.34E-04 | 9.91E-01 | 9.96E-01 | 6.18  | NUBP2  |
| IGF1   | 5890382 | PTX4        | -1.84E-06 | 1.31E-04 | 9.89E-01 | 9.96E-01 | 6.28  | NUBP2  |
| IGFBP3 | 2350706 | TRAF7       | -2.59E-08 | 8.16E-06 | 9.97E-01 | 9.97E-01 | 6.87  | NUBP2  |

Results are ordered by the association p-value.

Results with a FDR < 0.05 are marked in bold.

**Supplementary Table 8: Results of pQTL analysis in the SHIP-TREND cohort**

| SNP        | peptide sequence / protein | pQTL beta | pQTL SE | pQTL p-value | FDR          | N total | uniProt Identifier | SNP chr | SNP position | Effect Allele | Other Allele | Effect Allele Frequency | SNP Imputation Quality | GWAS Locus |
|------------|----------------------------|-----------|---------|--------------|--------------|---------|--------------------|---------|--------------|---------------|--------------|-------------------------|------------------------|------------|
| rs11644716 | AFWLDVSHNR                 | -0.147    | 0.040   | 2.81E-04     | <b>0.009</b> | 197     | ALS_HUMAN          | 16      | 1,802,928    | T             | C            | 0.96                    | 0.70                   | NUBP2      |
| rs11644716 | ELVLAGNR                   | -0.136    | 0.042   | 1.41E-03     | <b>0.014</b> | 197     | ALS_HUMAN          | 16      | 1,802,928    | T             | C            | 0.96                    | 0.70                   | NUBP2      |
| rs11644716 | TFTPQPPGLER                | -0.128    | 0.040   | 1.43E-03     | <b>0.014</b> | 197     | ALS_HUMAN          | 16      | 1,802,928    | T             | C            | 0.96                    | 0.70                   | NUBP2      |
| rs11644716 | NLPEQVFR                   | -0.161    | 0.051   | 1.75E-03     | <b>0.014</b> | 197     | ALS_HUMAN          | 16      | 1,802,928    | T             | C            | 0.96                    | 0.70                   | NUBP2      |
| rs11644716 | LEALPNSLLAPLGR             | -0.106    | 0.036   | 3.85E-03     | <b>0.024</b> | 197     | ALS_HUMAN          | 16      | 1,802,928    | T             | C            | 0.96                    | 0.70                   | NUBP2      |
| rs11644716 | ANVFVQLPR                  | -0.116    | 0.041   | 5.24E-03     | <b>0.024</b> | 197     | ALS_HUMAN          | 16      | 1,802,928    | T             | C            | 0.96                    | 0.70                   | NUBP2      |
| rs11644716 | WLDLSHNR                   | -0.110    | 0.039   | 5.26E-03     | <b>0.024</b> | 197     | ALS_HUMAN          | 16      | 1,802,928    | T             | C            | 0.96                    | 0.70                   | NUBP2      |
| rs11644716 | DFALQNPSAVPR               | -0.118    | 0.044   | 8.71E-03     | <b>0.033</b> | 197     | ALS_HUMAN          | 16      | 1,802,928    | T             | C            | 0.96                    | 0.70                   | NUBP2      |
| rs1065656  | ANVFVQLPR                  | 0.040     | 0.015   | 9.40E-03     | <b>0.033</b> | 197     | ALS_HUMAN          | 16      | 1,778,837    | G             | C            | 0.66                    | 0.99                   | NUBP2      |
| rs1065656  | TFTPQPPGLER                | 0.037     | 0.015   | 1.31E-02     | <b>0.042</b> | 197     | ALS_HUMAN          | 16      | 1,778,837    | G             | C            | 0.66                    | 0.99                   | NUBP2      |
| rs1065656  | LEALPNSLLAPLGR             | 0.033     | 0.013   | 1.44E-02     | <b>0.042</b> | 197     | ALS_HUMAN          | 16      | 1,778,837    | G             | C            | 0.66                    | 0.99                   | NUBP2      |
| rs1065656  | DFALQNPSAVPR               | 0.039     | 0.016   | 1.75E-02     | <b>0.047</b> | 197     | ALS_HUMAN          | 16      | 1,778,837    | G             | C            | 0.66                    | 0.99                   | NUBP2      |
| rs11977526 | YGQPLPGYTTK                | -0.049    | 0.021   | 2.37E-02     | 0.058        | 197     | IBP3_HUMAN         | 7       | 45,974,635   | G             | A            | 0.61                    | 0.99                   | IGFBP3     |
| rs1065656  | AFWLDVSHNR                 | 0.033     | 0.015   | 2.86E-02     | 0.065        | 197     | ALS_HUMAN          | 16      | 1,778,837    | G             | C            | 0.66                    | 0.99                   | NUBP2      |
| rs11644716 | NLIAAVAPGAFLGLK            | -0.091    | 0.042   | 3.18E-02     | 0.065        | 197     | ALS_HUMAN          | 16      | 1,802,928    | T             | C            | 0.96                    | 0.70                   | NUBP2      |
| rs1065656  | LAYLQPALFSGLAELR           | 0.034     | 0.016   | 3.27E-02     | 0.065        | 197     | ALS_HUMAN          | 16      | 1,778,837    | G             | C            | 0.66                    | 0.99                   | NUBP2      |
| rs11644716 | SLALGTFAHTPALASGLSNR       | -0.126    | 0.060   | 3.86E-02     | 0.073        | 196     | ALS_HUMAN          | 16      | 1,802,928    | T             | C            | 0.96                    | 0.70                   | NUBP2      |
| rs11644716 | LAYLQPALFSGLAELR           | -0.087    | 0.043   | 4.41E-02     | 0.078        | 197     | ALS_HUMAN          | 16      | 1,802,928    | T             | C            | 0.96                    | 0.70                   | NUBP2      |
| rs1065656  | SLALGTFAHTPALASGLSNR       | 0.043     | 0.022   | 5.36E-02     | 0.086        | 196     | ALS_HUMAN          | 16      | 1,778,837    | G             | C            | 0.66                    | 0.99                   | NUBP2      |
| rs1065656  | VAGLLEDTFPGLLGLR           | 0.062     | 0.032   | 5.47E-02     | 0.086        | 197     | ALS_HUMAN          | 16      | 1,778,837    | G             | C            | 0.66                    | 0.99                   | NUBP2      |
| rs11977526 | ALAQCAPPVAVCAELVR          | -0.048    | 0.025   | 5.64E-02     | 0.086        | 188     | IBP3_HUMAN         | 7       | 45,974,635   | G             | A            | 0.61                    | 0.99                   | IGFBP3     |
| rs11644716 | VAGLLEDTFPGLLGLR           | -0.150    | 0.087   | 8.86E-02     | 0.129        | 197     | ALS_HUMAN          | 16      | 1,802,928    | T             | C            | 0.96                    | 0.70                   | NUBP2      |
| rs1065656  | LWLEGNPWDCGCPK             | 0.049     | 0.029   | 9.50E-02     | 0.132        | 195     | ALS_HUMAN          | 16      | 1,778,837    | G             | C            | 0.66                    | 0.99                   | NUBP2      |
| rs1065656  | WLDLSHNR                   | 0.023     | 0.015   | 1.09E-01     | 0.145        | 197     | ALS_HUMAN          | 16      | 1,778,837    | G             | C            | 0.66                    | 0.99                   | NUBP2      |
| rs1065656  | ELVLAGNR                   | 0.024     | 0.016   | 1.32E-01     | 0.169        | 197     | ALS_HUMAN          | 16      | 1,778,837    | G             | C            | 0.66                    | 0.99                   | NUBP2      |

|            |                |        |       |                 |       |     |             |    |            |   |   |      |      |        |
|------------|----------------|--------|-------|-----------------|-------|-----|-------------|----|------------|---|---|------|------|--------|
| rs11644716 | DLHFLEELQLGHNR | -0.085 | 0.058 | 1.41E-01        | 0.173 | 197 | ALS_HUMAN   | 16 | 1,802,928  | T | C | 0.96 | 0.70 | NUBP2  |
| rs11644716 | LWLEGNPWDCGCLK | -0.107 | 0.079 | 1.73E-01        | 0.205 | 195 | ALS_HUMAN   | 16 | 1,802,928  | T | C | 0.96 | 0.70 | NUBP2  |
| rs1065656  | LLQLLGR        | -0.060 | 0.045 | 1.92E-01        | 0.220 | 176 | RT34_HUMAN  | 16 | 1,778,837  | G | C | 0.66 | 0.99 | NUBP2  |
| rs1065656  | NLPEQVFR       | 0.023  | 0.019 | 2.23E-01        | 0.246 | 197 | ALS_HUMAN   | 16 | 1,778,837  | G | C | 0.66 | 0.99 | NUBP2  |
| rs1065656  | NLIAAVAPGAFGLK | 0.018  | 0.016 | 2.42E-01        | 0.258 | 197 | ALS_HUMAN   | 16 | 1,778,837  | G | C | 0.66 | 0.99 | NUBP2  |
| rs1065656  | DLHFLEELQLGHNR | 0.014  | 0.021 | 5.26E-01        | 0.543 | 197 | ALS_HUMAN   | 16 | 1,778,837  | G | C | 0.66 | 0.99 | NUBP2  |
| rs780093   | DIAILK         | 0.004  | 0.012 | 7.26E-01        | 0.726 | 197 | CC121_HUMAN | 2  | 27,596,107 | T | C | 0.39 | 1.00 | GCKR   |
|            |                |        |       |                 |       |     |             |    |            |   |   |      |      |        |
| rs11644716 | protein ALS    | -0.120 | 0.037 | <b>1.53E-03</b> |       | 197 | ALS_HUMAN   | 16 | 1,802,928  | T | C | 0.96 | 0.70 | NUBP2  |
| rs11977526 | protein IBP3   | -0.051 | 0.020 | 1.06E-02        |       | 197 | IBP3_HUMAN  | 7  | 45,974,635 | G | A | 0.61 | 0.99 | IGFBP3 |
| rs1065656  | protein ALS    | 0.033  | 0.014 | 1.86E-02        |       | 197 | ALS_HUMAN   | 16 | 1,778,837  | G | C | 0.66 | 0.99 | NUBP2  |
| rs1065656  | protein RT34   | -0.060 | 0.045 | 1.92E-01        |       | 176 | RT34_HUMAN  | 16 | 1,778,837  | G | C | 0.66 | 0.99 | NUBP2  |
| rs780093   | protein CC121  | 0.004  | 0.012 | 7.26E-01        |       | 197 | CC121_HUMAN | 2  | 27,596,107 | T | C | 0.39 | 1.00 | GCKR   |

Results are ordered by peptide/protein association and then by p-value.  
Significant results are marked in bold.

**Supplementary Table 9: Lookup of genome-wide significant lead SNPs in IGF-I/IGFBP-3 correlated traits**

| SNP        | GWAS Locus    | BMI             | Height          | Waist-to-hip ratio | Fat percentage  | Lumbar spine BMD | Femoral neck BMD | CARDIoGRAM GWA meta-analysis | C4D GWA meta-analysis | CARDIoGRAMplusC4D MetaboChip meta-analysis | longevity       |
|------------|---------------|-----------------|-----------------|--------------------|-----------------|------------------|------------------|------------------------------|-----------------------|--------------------------------------------|-----------------|
| rs1065656  | <i>NUBP2</i>  | 7.43E-01        | 1.60E-01        | 8.20E-02           | 4.82E-01        | 6.38E-01         | 5.47E-01         | 2.04E-01                     | NA                    | NA                                         | 7.33E-01        |
| rs11977526 | <i>IGFBP3</i> | 4.43E-01        | 3.25E-02        | 3.60E-02           | <b>7.12E-03</b> | 2.60E-01         | 1.00E+00         | 4.58E-01                     | NA                    | 2.61E-01                                   | 2.30E-01        |
| rs2153960  | <i>FOXO3</i>  | <b>1.80E-03</b> | <b>5.13E-05</b> | 2.50E-01           | 6.87E-01        | 6.24E-01         | 3.62E-01         | 1.45E-01                     | 4.95E-01              | NA                                         | <b>3.19E-04</b> |
| rs4234798  | <i>SORCS2</i> | 6.23E-01        | 7.31E-01        | 3.10E-01           | 3.34E-01        | 6.62E-02         | 8.19E-01         | 2.94E-01                     | 2.05E-01              | NA                                         | 6.39E-01        |
| rs509035   | <i>GHSR</i>   | 4.25E-01        | <b>1.36E-13</b> | 1.60E-01           | 2.31E-01        | 6.88E-01         | 3.01E-01         | 2.77E-01                     | NA                    | <b>4.89E-02</b>                            | 5.78E-01        |
| rs646776   | <i>CELSR2</i> | 6.51E-02        | <b>7.63E-05</b> | 2.30E-01           | 6.25E-01        | <b>9.03E-03</b>  | 2.71E-01         | <b>5.19E-08</b>              | <b>7.01E-11</b>       | <b>9.41E-15</b>                            | 1.77E-01        |
| rs700753   | <i>TNS3</i>   | 3.55E-01        | 1.32E-01        | 2.30E-01           | 3.09E-01        | 1.57E-01         | <b>2.34E-02</b>  | 5.58E-02                     | NA                    | NA                                         | 8.63E-01        |
| rs780093   | <i>GCKR</i>   | 8.71E-02        | <b>1.90E-04</b> | <b>3.00E-04</b>    | 3.24E-01        | <b>2.90E-03</b>  | 2.43E-01         | 1.27E-01                     | NA                    | 5.82E-01                                   | 7.68E-01        |
| rs934073   | <i>ASXL2</i>  | <b>8.20E-03</b> | 1.02E-01        | 5.70E-02           | <b>9.37E-05</b> | <b>4.26E-03</b>  | 3.45E-01         | 5.66E-01                     | NA                    | NA                                         | <b>1.81E-02</b> |
| rs978458   | <i>IGF1</i>   | 5.22E-01        | 1.88E-01        | 1.50E-02           | 2.67E-01        | 5.83E-01         | 1.71E-01         | 1.22E-01                     | 2.74E-01              | <b>3.71E-02</b>                            | 5.18E-01        |

  

| SNP        | GWAS Locus    | type 2 diabetes (GWAS) | type 2 diabetes (MetaboChip) | Fasting glucose | 2-hour glucose  | HbA1c           | Fasting insulin | Proinsulin      | HOMA-IR         | HOMA-B          |
|------------|---------------|------------------------|------------------------------|-----------------|-----------------|-----------------|-----------------|-----------------|-----------------|-----------------|
| rs1065656  | <i>NUBP2</i>  | 8.50E-01               | NA                           | 1.92E-01        | 7.48E-02        | 4.44E-01        | 6.58E-01        | 1.53E-01        | 8.05E-01        | 7.65E-01        |
| rs11977526 | <i>IGFBP3</i> | <b>1.90E-02</b>        | 1.57E-01                     | 5.83E-01        | 2.21E-01        | 5.79E-01        | 3.07E-01        | 4.19E-01        | 1.03E-01        | 2.68E-01        |
| rs2153960  | <i>FOXO3</i>  | 3.10E-01               | NA                           | 3.00E-01        | 9.38E-01        | 1.29E-01        | 9.93E-01        | 2.57E-01        | 8.02E-01        | 8.96E-01        |
| rs4234798  | <i>SORCS2</i> | 3.30E-01               | NA                           | 8.82E-01        | 5.08E-01        | 8.89E-01        | 5.14E-01        | 5.67E-01        | 1.80E-01        | 4.36E-01        |
| rs509035   | <i>GHSR</i>   | 7.70E-01               | 8.72E-01                     | 7.09E-01        | 3.81E-01        | <b>1.21E-02</b> | 3.29E-01        | 4.40E-01        | 8.34E-01        | 4.50E-01        |
| rs646776   | <i>CELSR2</i> | <b>2.40E-02</b>        | <b>1.19E-02</b>              | 1.61E-01        | 1.66E-01        | 8.36E-01        | 2.47E-01        | 3.22E-01        | 8.98E-01        | 1.94E-01        |
| rs700753   | <i>TNS3</i>   | <b>1.50E-02</b>        | NA                           | 6.79E-01        | 3.54E-01        | <b>2.28E-04</b> | 8.35E-01        | <b>2.99E-02</b> | 7.56E-01        | 9.56E-01        |
| rs780093   | <i>GCKR</i>   | 8.60E-02               | <b>3.70E-06</b>              | <b>2.91E-13</b> | <b>1.68E-06</b> | 3.02E-01        | <b>1.98E-04</b> | <b>4.01E-02</b> | 3.87E-01        | <b>1.31E-06</b> |
| rs934073   | <i>ASXL2</i>  | 3.70E-01               | NA                           | 2.76E-01        | 4.22E-01        | 7.79E-01        | 1.27E-01        | 1.91E-01        | 3.12E-01        | 9.23E-02        |
| rs978458   | <i>IGF1</i>   | 1.60E-01               | <b>2.66E-02</b>              | 5.00E-01        | 2.72E-01        | 8.98E-01        | <b>4.74E-04</b> | 9.64E-01        | <b>3.71E-04</b> | <b>9.84E-05</b> |

NA = results not available.  
p-values < 0.01 are marked in bold.

References: (height, BMI, waist-to-hip ratio, and fat percentage) (Heid *et al.* 2010; Lango Allen *et al.* 2010; Speliotes *et al.* 2010), bone mineral density (Estrada *et al.* 2012), risk of type 2 diabetes (Voight *et al.* 2010; Morris *et al.* 2012) and related traits (fasting glucose, 2-hour glucose, HbA1c, fasting insulin, proinsulin, HOMA-IR, and HOMA-B) (Dupuis *et al.* 2010; Saxena *et al.* 2010; Soranzo *et al.* 2010), coronary artery disease (Coronary Artery Disease Genetics 2011; Schunkert *et al.* 2011; Consortium *et al.* 2013) and survival beyond age 90 years old (Broer *et al.* 2014).

**Supplementary Table 10: Lookup of Top IGF-I associated SNPs in associations with survival  
beyond age 90 years old**

| SNP               | Effect allele | Other allele | Effect allele frequency | Effect        | SE           | p-value         | Effect direction for IGF-I |
|-------------------|---------------|--------------|-------------------------|---------------|--------------|-----------------|----------------------------|
| <b>rs10457180</b> | <b>a</b>      | <b>g</b>     | <b>0.70</b>             | <b>-0.144</b> | <b>0.037</b> | <b>8.56E-05</b> | <b>+</b>                   |
| rs9400239         | t             | c            | 0.30                    | 0.144         | 0.037        | 9.10E-05        | -                          |
| rs13217795        | t             | c            | 0.70                    | -0.144        | 0.037        | 9.15E-05        | +                          |
| rs4946932         | a             | c            | 0.30                    | 0.144         | 0.037        | 9.33E-05        | -                          |
| rs2022464         | a             | c            | 0.31                    | 0.143         | 0.037        | 9.73E-05        | -                          |
| rs3800227         | a             | g            | 0.26                    | 0.146         | 0.039        | 1.61E-04        | -                          |
| rs1268178         | t             | g            | 0.66                    | -0.153        | 0.041        | 1.75E-04        | +                          |
| rs1268170         | a             | g            | 0.65                    | -0.132        | 0.035        | 2.07E-04        | +                          |
| rs1268169         | t             | g            | 0.65                    | -0.131        | 0.036        | 2.10E-04        | +                          |
| rs1268166         | t             | c            | 0.66                    | -0.132        | 0.036        | 2.16E-04        | +                          |
| rs1268167         | a             | g            | 0.35                    | 0.131         | 0.036        | 2.17E-04        | -                          |
| rs1268165         | t             | c            | 0.65                    | -0.131        | 0.036        | 2.31E-04        | +                          |
| rs1268164         | a             | g            | 0.65                    | -0.131        | 0.036        | 2.34E-04        | +                          |
| rs1268171         | c             | g            | 0.65                    | -0.130        | 0.036        | 2.44E-04        | +                          |
| rs2207731         | a             | g            | 0.65                    | -0.130        | 0.035        | 2.51E-04        | +                          |
| rs9398172         | a             | g            | 0.70                    | -0.133        | 0.036        | 2.54E-04        | +                          |
| rs1268162         | a             | g            | 0.65                    | -0.130        | 0.036        | 2.55E-04        | +                          |
| rs1935949         | a             | g            | 0.30                    | 0.133         | 0.036        | 2.58E-04        | -                          |
| rs3800229         | t             | g            | 0.70                    | -0.133        | 0.036        | 2.59E-04        | +                          |
| rs1935952         | c             | g            | 0.70                    | -0.132        | 0.036        | 2.70E-04        | +                          |
| rs1159806         | a             | t            | 0.65                    | -0.129        | 0.036        | 2.75E-04        | +                          |
| rs1268177         | a             | g            | 0.65                    | -0.129        | 0.036        | 2.91E-04        | +                          |
| rs4946936         | t             | c            | 0.29                    | 0.132         | 0.037        | 2.95E-04        | -                          |
| rs1268179         | c             | g            | 0.35                    | 0.129         | 0.036        | 2.99E-04        | -                          |
| rs1268174         | a             | g            | 0.65                    | -0.129        | 0.036        | 3.18E-04        | +                          |
| rs2153960         | a             | g            | 0.70                    | -0.130        | 0.036        | 3.19E-04        | +                          |
| rs1268175         | a             | g            | 0.65                    | -0.128        | 0.036        | 3.29E-04        | +                          |
| rs4946935         | a             | g            | 0.29                    | 0.131         | 0.037        | 3.51E-04        | -                          |
| rs9398171         | t             | c            | 0.71                    | -0.130        | 0.037        | 4.02E-04        | +                          |
| <b>rs11892454</b> | <b>a</b>      | <b>g</b>     | <b>0.74</b>             | <b>0.115</b>  | <b>0.039</b> | <b>3.03E-03</b> | <b>-</b>                   |
| rs6546452         | a             | g            | 0.22                    | -0.103        | 0.040        | 9.02E-03        | +                          |
| rs17680828        | t             | c            | 0.78                    | 0.102         | 0.040        | 1.04E-02        | -                          |
| rs10180261        | t             | c            | 0.22                    | -0.102        | 0.040        | 1.07E-02        | +                          |
| rs934073          | c             | g            | 0.71                    | 0.089         | 0.038        | 1.81E-02        | -                          |
| rs6760135         | t             | c            | 0.23                    | -0.091        | 0.040        | 2.28E-02        | +                          |
| rs10190878        | a             | g            | 0.69                    | 0.080         | 0.037        | 3.17E-02        | -                          |

|            |   |   |      |        |       |          |   |
|------------|---|---|------|--------|-------|----------|---|
| rs479744   | t | g | 0.21 | 0.090  | 0.042 | 3.19E-02 | - |
| rs7564034  | a | g | 0.68 | 0.077  | 0.036 | 3.47E-02 | - |
| rs10184492 | c | g | 0.68 | 0.076  | 0.036 | 3.61E-02 | - |
| rs7574653  | t | c | 0.68 | 0.076  | 0.036 | 3.62E-02 | - |
| rs9486916  | t | c | 0.20 | 0.088  | 0.042 | 3.76E-02 | - |
| rs6711346  | a | g | 0.33 | -0.086 | 0.042 | 4.01E-02 | + |
| rs13004909 | a | t | 0.29 | -0.072 | 0.037 | 5.13E-02 | + |
| rs7605347  | a | g | 0.71 | 0.072  | 0.037 | 5.15E-02 | - |
| rs13410396 | c | g | 0.29 | -0.072 | 0.037 | 5.21E-02 | + |
| rs3778588  | t | c | 0.17 | 0.087  | 0.045 | 5.21E-02 | - |
| rs17680961 | t | g | 0.71 | 0.072  | 0.037 | 5.23E-02 | - |
| rs531111   | t | c | 0.82 | -0.086 | 0.044 | 5.37E-02 | + |
| rs11888724 | a | g | 0.71 | 0.071  | 0.037 | 5.41E-02 | - |
| rs11904454 | t | c | 0.29 | -0.071 | 0.037 | 5.43E-02 | + |
| rs11888512 | a | g | 0.71 | 0.071  | 0.037 | 5.43E-02 | - |
| rs13030095 | a | g | 0.29 | -0.069 | 0.037 | 6.05E-02 | + |
| rs10191905 | t | g | 0.71 | 0.069  | 0.037 | 6.21E-02 | - |
| rs10207926 | a | c | 0.71 | 0.068  | 0.037 | 6.32E-02 | - |
| rs10174199 | a | c | 0.71 | 0.068  | 0.037 | 6.42E-02 | - |
| rs13418205 | t | c | 0.71 | 0.068  | 0.037 | 6.42E-02 | - |
| rs878223   | a | t | 0.71 | 0.068  | 0.037 | 6.44E-02 | - |
| rs6758088  | a | g | 0.29 | -0.068 | 0.037 | 6.46E-02 | + |
| rs890680   | a | g | 0.71 | 0.068  | 0.037 | 6.51E-02 | - |
| rs1076000  | a | g | 0.29 | -0.068 | 0.037 | 6.57E-02 | + |
| rs890681   | a | c | 0.71 | 0.068  | 0.037 | 6.58E-02 | - |
| rs10153560 | a | g | 0.71 | 0.068  | 0.037 | 6.58E-02 | - |
| rs7572629  | a | g | 0.71 | 0.068  | 0.037 | 6.59E-02 | - |
| rs3731639  | t | g | 0.29 | -0.068 | 0.037 | 6.65E-02 | + |
| rs919205   | t | c | 0.29 | -0.068 | 0.037 | 6.65E-02 | + |
| rs10194371 | a | g | 0.29 | -0.067 | 0.037 | 6.71E-02 | + |
| rs10171348 | t | c | 0.29 | -0.067 | 0.037 | 6.72E-02 | + |
| rs12713680 | a | g | 0.71 | 0.067  | 0.037 | 6.76E-02 | - |
| rs10180842 | a | g | 0.71 | 0.067  | 0.037 | 6.77E-02 | - |
| rs10182811 | t | c | 0.29 | -0.067 | 0.037 | 6.88E-02 | + |
| rs3813498  | t | c | 0.81 | -0.079 | 0.044 | 6.88E-02 | + |
| rs11897276 | a | g | 0.71 | 0.067  | 0.037 | 7.00E-02 | - |
| rs2891480  | a | c | 0.29 | -0.067 | 0.037 | 7.07E-02 | + |
| rs13421137 | a | g | 0.29 | -0.066 | 0.037 | 7.19E-02 | + |
| rs9309434  | t | c | 0.29 | -0.066 | 0.037 | 7.26E-02 | + |
| rs1935958  | t | c | 0.15 | 0.083  | 0.047 | 7.49E-02 | - |
| rs13425195 | t | c | 0.71 | 0.067  | 0.038 | 7.73E-02 | - |
| rs7560314  | t | g | 0.32 | -0.064 | 0.036 | 7.75E-02 | + |



|                   |          |          |             |               |              |                 |          |
|-------------------|----------|----------|-------------|---------------|--------------|-----------------|----------|
| rs10469884        | t        | g        | 0.29        | -0.065        | 0.037        | 7.82E-02        | +        |
| rs7599961         | t        | c        | 0.68        | 0.063         | 0.036        | 7.86E-02        | -        |
| rs11894959        | t        | c        | 0.32        | -0.063        | 0.036        | 8.03E-02        | +        |
| rs6753192         | a        | c        | 0.32        | -0.063        | 0.036        | 8.04E-02        | +        |
| rs7591614         | t        | c        | 0.32        | -0.063        | 0.036        | 8.05E-02        | +        |
| rs10490569        | t        | c        | 0.68        | 0.063         | 0.036        | 8.08E-02        | -        |
| rs7571093         | c        | g        | 0.68        | 0.063         | 0.036        | 8.11E-02        | -        |
| rs13405775        | t        | c        | 0.33        | -0.062        | 0.036        | 8.28E-02        | +        |
| rs13413825        | a        | t        | 0.33        | -0.062        | 0.036        | 8.30E-02        | +        |
| rs2176180         | t        | c        | 0.33        | -0.062        | 0.036        | 8.49E-02        | +        |
| rs10210497        | t        | g        | 0.73        | 0.067         | 0.039        | 8.59E-02        | -        |
| rs4063544         | a        | c        | 0.67        | 0.061         | 0.036        | 8.63E-02        | -        |
| rs10168718        | a        | g        | 0.33        | -0.061        | 0.036        | 8.73E-02        | +        |
| rs10208202        | t        | c        | 0.67        | 0.061         | 0.036        | 8.83E-02        | -        |
| rs13004845        | t        | c        | 0.33        | -0.061        | 0.036        | 8.85E-02        | +        |
| rs10178552        | t        | c        | 0.32        | -0.060        | 0.036        | 9.30E-02        | +        |
| rs6741640         | t        | c        | 0.33        | -0.060        | 0.036        | 9.49E-02        | +        |
| rs10185886        | a        | c        | 0.67        | 0.060         | 0.036        | 9.50E-02        | -        |
| rs11888036        | a        | g        | 0.67        | 0.060         | 0.036        | 9.54E-02        | -        |
| rs9480867         | a        | g        | 0.16        | 0.076         | 0.046        | 9.60E-02        | -        |
| rs1268161         | a        | g        | 0.16        | 0.075         | 0.045        | 9.68E-02        | -        |
| rs11898327        | t        | c        | 0.67        | 0.059         | 0.036        | 1.03E-01        | -        |
| rs6546575         | c        | g        | 0.33        | -0.059        | 0.036        | 1.04E-01        | +        |
| rs9480866         | t        | c        | 0.16        | 0.073         | 0.045        | 1.07E-01        | -        |
| rs9486913         | c        | g        | 0.84        | -0.072        | 0.045        | 1.09E-01        | +        |
| rs761779          | a        | g        | 0.16        | 0.072         | 0.045        | 1.13E-01        | -        |
| rs9285397         | t        | c        | 0.84        | -0.068        | 0.045        | 1.29E-01        | +        |
| rs7762395         | a        | g        | 0.16        | 0.069         | 0.046        | 1.30E-01        | -        |
| rs9486901         | t        | c        | 0.83        | -0.066        | 0.045        | 1.42E-01        | +        |
| <b>rs1799969</b>  | <b>a</b> | <b>g</b> | <b>0.12</b> | <b>-0.077</b> | <b>0.054</b> | <b>1.58E-01</b> | <b>+</b> |
| rs7747393         | t        | c        | 0.16        | 0.062         | 0.045        | 1.71E-01        | -        |
| rs6739177         | t        | c        | 0.67        | 0.054         | 0.041        | 1.79E-01        | -        |
| rs7609004         | t        | c        | 0.67        | 0.054         | 0.040        | 1.83E-01        | -        |
| rs9480865         | t        | c        | 0.84        | -0.059        | 0.045        | 1.91E-01        | +        |
| rs7753734         | t        | c        | 0.17        | 0.059         | 0.045        | 1.95E-01        | -        |
| rs9486902         | t        | c        | 0.16        | 0.058         | 0.045        | 1.98E-01        | -        |
| rs949940          | a        | g        | 0.55        | 0.042         | 0.035        | 2.27E-01        | +        |
| <b>rs11111272</b> | <b>c</b> | <b>g</b> | <b>0.71</b> | <b>-0.042</b> | <b>0.037</b> | <b>2.68E-01</b> | <b>-</b> |
| rs1917615         | a        | c        | 0.22        | -0.046        | 0.043        | 2.93E-01        | -        |
| <b>rs12084451</b> | <b>a</b> | <b>t</b> | <b>0.85</b> | <b>-0.051</b> | <b>0.049</b> | <b>2.98E-01</b> | <b>-</b> |
| <b>rs4143841</b>  | <b>t</b> | <b>c</b> | <b>0.50</b> | <b>0.036</b>  | <b>0.035</b> | <b>3.03E-01</b> | <b>+</b> |
| rs5009837         | t        | c        | 0.29        | 0.038         | 0.037        | 3.15E-01        | +        |

|                   |          |          |             |               |              |                 |   |
|-------------------|----------|----------|-------------|---------------|--------------|-----------------|---|
| rs12145383        | a        | t        | 0.15        | 0.046         | 0.047        | 3.21E-01        | + |
| rs12061205        | t        | c        | 0.15        | 0.046         | 0.047        | 3.24E-01        | + |
| rs1506779         | a        | t        | 0.85        | -0.046        | 0.047        | 3.25E-01        | - |
| rs10913208        | t        | c        | 0.15        | 0.046         | 0.047        | 3.28E-01        | + |
| rs10745940        | a        | g        | 0.29        | 0.036         | 0.038        | 3.37E-01        | + |
| <b>rs11689803</b> | <b>a</b> | <b>t</b> | <b>0.28</b> | <b>0.037</b>  | <b>0.040</b> | <b>3.62E-01</b> | + |
| rs7592985         | a        | c        | 0.73        | 0.042         | 0.048        | 3.85E-01        | - |
| rs12094283        | t        | c        | 0.84        | -0.039        | 0.046        | 3.93E-01        | - |
| rs10193672        | c        | g        | 0.73        | 0.041         | 0.048        | 3.94E-01        | - |
| <b>rs157930</b>   | <b>t</b> | <b>c</b> | <b>0.30</b> | <b>-0.033</b> | <b>0.039</b> | <b>4.01E-01</b> | + |
| rs10753130        | t        | c        | 0.16        | 0.037         | 0.046        | 4.19E-01        | + |
| rs157931          | t        | c        | 0.30        | -0.031        | 0.039        | 4.23E-01        | + |
| rs4492574         | t        | c        | 0.75        | 0.030         | 0.039        | 4.37E-01        | - |
| rs12537178        | a        | g        | 0.22        | -0.031        | 0.042        | 4.62E-01        | - |
| rs972936          | t        | c        | 0.27        | 0.027         | 0.038        | 4.78E-01        | + |
| <b>rs10860865</b> | <b>t</b> | <b>g</b> | <b>0.27</b> | <b>0.027</b>  | <b>0.038</b> | <b>4.85E-01</b> | + |
| rs10020957        | a        | g        | 0.41        | -0.024        | 0.034        | 4.86E-01        | - |
| rs5742667         | a        | g        | 0.27        | 0.027         | 0.038        | 4.87E-01        | + |
| rs5742678         | c        | g        | 0.27        | 0.026         | 0.038        | 4.99E-01        | + |
| rs9308315         | a        | t        | 0.27        | 0.025         | 0.038        | 5.09E-01        | + |
| <b>rs856567</b>   | <b>c</b> | <b>g</b> | <b>0.57</b> | <b>0.022</b>  | <b>0.034</b> | <b>5.12E-01</b> | + |
| rs978458          | t        | c        | 0.27        | 0.025         | 0.038        | 5.18E-01        | + |
| rs10489477        | t        | c        | 0.15        | 0.029         | 0.047        | 5.46E-01        | + |
| rs11578503        | t        | c        | 0.15        | 0.028         | 0.048        | 5.49E-01        | + |
| rs11585020        | a        | g        | 0.84        | -0.028        | 0.047        | 5.56E-01        | - |
| <b>rs572169</b>   | <b>t</b> | <b>c</b> | <b>0.31</b> | <b>0.022</b>  | <b>0.037</b> | <b>5.58E-01</b> | + |
| rs4764696         | t        | c        | 0.25        | 0.022         | 0.039        | 5.68E-01        | + |
| rs509035          | a        | g        | 0.31        | 0.020         | 0.037        | 5.78E-01        | + |
| rs157935          | t        | g        | 0.70        | 0.021         | 0.037        | 5.82E-01        | - |
| rs2373721         | c        | g        | 0.75        | -0.021        | 0.039        | 5.88E-01        | - |
| rs125124          | c        | g        | 0.70        | 0.020         | 0.038        | 5.90E-01        | - |
| rs2288378         | t        | c        | 0.25        | 0.021         | 0.039        | 5.97E-01        | + |
| rs4425043         | a        | g        | 0.38        | -0.018        | 0.035        | 6.07E-01        | + |
| rs17172765        | c        | g        | 0.21        | -0.022        | 0.044        | 6.09E-01        | - |
| rs5742694         | a        | c        | 0.75        | -0.020        | 0.039        | 6.10E-01        | - |
| rs856589          | a        | g        | 0.32        | -0.018        | 0.036        | 6.11E-01        | + |
| rs856540          | a        | g        | 0.37        | -0.019        | 0.036        | 6.11E-01        | - |
| rs7296464         | a        | g        | 0.75        | -0.020        | 0.039        | 6.14E-01        | - |
| rs4689088         | a        | g        | 0.61        | 0.017         | 0.034        | 6.14E-01        | + |
| rs1260320         | a        | g        | 0.39        | -0.018        | 0.035        | 6.16E-01        | + |
| rs813592          | t        | c        | 0.61        | 0.017         | 0.035        | 6.19E-01        | - |
| rs2293572         | c        | g        | 0.62        | 0.017         | 0.035        | 6.25E-01        | - |

|                  |          |          |             |              |              |                 |   |
|------------------|----------|----------|-------------|--------------|--------------|-----------------|---|
| rs4234797        | a        | g        | 0.61        | 0.017        | 0.034        | 6.26E-01        | + |
| rs3739095        | a        | g        | 0.44        | 0.017        | 0.035        | 6.30E-01        | + |
| rs2293571        | a        | g        | 0.38        | -0.017       | 0.035        | 6.31E-01        | + |
| <b>rs2575352</b> | <b>a</b> | <b>g</b> | <b>0.15</b> | <b>0.023</b> | <b>0.048</b> | <b>6.31E-01</b> | - |
| rs704795         | a        | g        | 0.39        | -0.017       | 0.035        | 6.36E-01        | + |
| <b>rs9388487</b> | <b>t</b> | <b>g</b> | <b>0.46</b> | <b>0.018</b> | <b>0.039</b> | <b>6.39E-01</b> | + |
| rs4234798        | t        | g        | 0.39        | -0.016       | 0.034        | 6.39E-01        | - |
| rs6760828        | t        | c        | 0.61        | 0.015        | 0.035        | 6.65E-01        | - |
| rs780110         | a        | g        | 0.44        | 0.015        | 0.035        | 6.70E-01        | + |
| rs11767621       | a        | g        | 0.79        | 0.019        | 0.046        | 6.72E-01        | + |
| rs4775455        | a        | t        | 0.56        | -0.016       | 0.039        | 6.74E-01        | + |
| rs2303369        | t        | c        | 0.38        | -0.014       | 0.035        | 6.80E-01        | + |
| rs9375435        | t        | c        | 0.46        | 0.014        | 0.034        | 6.83E-01        | + |
| rs1049817        | a        | g        | 0.61        | 0.014        | 0.035        | 6.84E-01        | - |
| rs4665969        | t        | c        | 0.61        | 0.014        | 0.035        | 6.84E-01        | - |
| rs957755         | t        | g        | 0.19        | -0.018       | 0.044        | 6.89E-01        | - |
| rs700750         | a        | c        | 0.62        | 0.014        | 0.035        | 6.89E-01        | + |
| rs6743819        | t        | g        | 0.39        | -0.014       | 0.035        | 6.92E-01        | + |
| rs10205219       | t        | c        | 0.61        | 0.014        | 0.035        | 6.92E-01        | - |
| rs4665978        | t        | c        | 0.56        | -0.014       | 0.035        | 6.96E-01        | - |
| rs7586601        | a        | g        | 0.56        | -0.013       | 0.035        | 7.02E-01        | - |
| rs11769597       | t        | c        | 0.81        | 0.016        | 0.044        | 7.08E-01        | + |
| rs856560         | t        | c        | 0.38        | -0.013       | 0.034        | 7.10E-01        | - |
| rs856563         | t        | c        | 0.38        | -0.013       | 0.034        | 7.11E-01        | - |
| rs963024         | a        | g        | 0.59        | 0.013        | 0.035        | 7.20E-01        | + |
| rs2280737        | t        | c        | 0.62        | 0.012        | 0.035        | 7.21E-01        | - |
| rs780100         | t        | g        | 0.39        | -0.012       | 0.035        | 7.23E-01        | + |
| rs704791         | t        | c        | 0.61        | 0.012        | 0.035        | 7.24E-01        | - |
| rs780117         | c        | g        | 0.61        | 0.012        | 0.035        | 7.24E-01        | - |
| rs1060525        | a        | g        | 0.61        | 0.012        | 0.035        | 7.24E-01        | - |
| rs4724487        | a        | g        | 0.73        | 0.013        | 0.038        | 7.24E-01        | + |
| rs7563162        | t        | c        | 0.39        | -0.012       | 0.035        | 7.25E-01        | + |
| rs2911712        | a        | t        | 0.61        | 0.012        | 0.035        | 7.25E-01        | - |
| rs7170293        | a        | t        | 0.43        | -0.013       | 0.036        | 7.26E-01        | - |
| rs12533001       | t        | g        | 0.19        | -0.016       | 0.046        | 7.26E-01        | - |
| rs6547626        | t        | c        | 0.39        | -0.012       | 0.035        | 7.26E-01        | + |
| rs4665976        | a        | g        | 0.61        | 0.012        | 0.035        | 7.31E-01        | - |
| rs1728922        | a        | c        | 0.61        | 0.012        | 0.035        | 7.33E-01        | - |
| rs1647266        | t        | c        | 0.61        | 0.012        | 0.035        | 7.33E-01        | - |
| rs1065656        | c        | g        | 0.30        | 0.013        | 0.038        | 7.33E-01        | - |
| rs4803           | a        | g        | 0.61        | 0.012        | 0.035        | 7.33E-01        | - |
| rs780102         | t        | c        | 0.61        | 0.012        | 0.035        | 7.36E-01        | - |

|                  |          |          |             |               |              |                 |          |
|------------------|----------|----------|-------------|---------------|--------------|-----------------|----------|
| rs1260341        | a        | t        | 0.39        | -0.012        | 0.035        | 7.36E-01        | +        |
| rs2010087        | t        | c        | 0.38        | -0.012        | 0.035        | 7.37E-01        | +        |
| rs1260342        | t        | g        | 0.39        | -0.012        | 0.035        | 7.38E-01        | +        |
| rs157928         | t        | c        | 0.66        | 0.013         | 0.039        | 7.38E-01        | -        |
| rs12476704       | a        | c        | 0.38        | -0.012        | 0.035        | 7.38E-01        | +        |
| rs1647276        | t        | c        | 0.39        | -0.012        | 0.035        | 7.40E-01        | +        |
| rs780106         | a        | c        | 0.61        | 0.012         | 0.035        | 7.40E-01        | -        |
| rs12535368       | a        | g        | 0.27        | -0.013        | 0.038        | 7.40E-01        | -        |
| rs7594812        | a        | g        | 0.61        | 0.012         | 0.035        | 7.41E-01        | -        |
| rs780104         | a        | g        | 0.39        | -0.011        | 0.035        | 7.45E-01        | +        |
| rs780107         | a        | g        | 0.61        | 0.011         | 0.035        | 7.48E-01        | -        |
| rs1647284        | t        | c        | 0.39        | -0.011        | 0.035        | 7.49E-01        | +        |
| rs4724488        | a        | g        | 0.27        | -0.012        | 0.038        | 7.51E-01        | -        |
| rs17259858       | t        | c        | 0.73        | 0.012         | 0.038        | 7.51E-01        | +        |
| <b>rs2144782</b> | <b>t</b> | <b>c</b> | <b>0.37</b> | <b>-0.012</b> | <b>0.038</b> | <b>7.52E-01</b> | <b>+</b> |
| rs7177173        | a        | t        | 0.60        | 0.011         | 0.035        | 7.52E-01        | +        |
| rs780094         | t        | c        | 0.40        | -0.010        | 0.034        | 7.59E-01        | -        |
| rs10229581       | t        | c        | 0.23        | 0.013         | 0.042        | 7.64E-01        | -        |
| rs7602534        | t        | c        | 0.38        | -0.010        | 0.035        | 7.66E-01        | +        |
| rs9388486        | t        | c        | 0.55        | -0.010        | 0.034        | 7.67E-01        | -        |
| rs6907898        | t        | c        | 0.45        | 0.010         | 0.034        | 7.67E-01        | +        |
| rs780093         | t        | c        | 0.40        | -0.010        | 0.034        | 7.68E-01        | -        |
| rs7172145        | t        | c        | 0.58        | 0.010         | 0.036        | 7.70E-01        | +        |
| rs7166891        | a        | t        | 0.42        | -0.010        | 0.036        | 7.71E-01        | -        |
| rs17172768       | a        | g        | 0.23        | 0.012         | 0.042        | 7.77E-01        | -        |
| rs856565         | a        | c        | 0.27        | -0.011        | 0.038        | 7.77E-01        | +        |
| rs17172769       | c        | g        | 0.23        | 0.012         | 0.042        | 7.79E-01        | -        |
| rs1528533        | c        | g        | 0.39        | -0.010        | 0.035        | 7.82E-01        | +        |
| rs856569         | a        | g        | 0.26        | -0.011        | 0.039        | 7.83E-01        | +        |
| rs13472          | a        | g        | 0.38        | -0.010        | 0.035        | 7.85E-01        | +        |
| rs17172767       | t        | c        | 0.77        | -0.011        | 0.042        | 7.89E-01        | +        |
| rs878024         | t        | c        | 0.27        | -0.010        | 0.038        | 7.93E-01        | -        |
| rs1425270        | t        | c        | 0.55        | 0.009         | 0.035        | 7.95E-01        | +        |
| rs1436958        | t        | g        | 0.41        | -0.009        | 0.035        | 7.96E-01        | -        |
| rs856568         | a        | t        | 0.74        | 0.010         | 0.038        | 8.00E-01        | -        |
| rs1260333        | a        | g        | 0.46        | 0.009         | 0.034        | 8.04E-01        | -        |
| rs8027751        | a        | t        | 0.40        | -0.009        | 0.035        | 8.06E-01        | -        |
| rs2911711        | a        | t        | 0.54        | -0.008        | 0.035        | 8.08E-01        | +        |
| rs8179252        | a        | c        | 0.61        | 0.008         | 0.035        | 8.11E-01        | -        |
| rs7782135        | t        | c        | 0.73        | 0.009         | 0.038        | 8.18E-01        | +        |
| rs11681351       | a        | g        | 0.39        | -0.008        | 0.035        | 8.21E-01        | +        |
| rs7738135        | a        | g        | 0.45        | 0.009         | 0.038        | 8.22E-01        | +        |

|            |   |   |      |        |       |          |   |
|------------|---|---|------|--------|-------|----------|---|
| rs12912208 | t | c | 0.47 | -0.008 | 0.035 | 8.30E-01 | - |
| rs2414755  | t | c | 0.42 | -0.007 | 0.035 | 8.42E-01 | - |
| rs1260326  | t | c | 0.41 | -0.007 | 0.034 | 8.43E-01 | - |
| rs8034914  | a | g | 0.60 | 0.007  | 0.035 | 8.45E-01 | + |
| rs5006593  | t | c | 0.40 | -0.007 | 0.035 | 8.45E-01 | - |
| rs8033816  | a | g | 0.57 | 0.007  | 0.037 | 8.47E-01 | + |
| rs949941   | a | g | 0.77 | -0.008 | 0.042 | 8.48E-01 | + |
| rs8029942  | a | g | 0.47 | -0.007 | 0.035 | 8.49E-01 | - |
| rs8034335  | a | g | 0.42 | -0.006 | 0.034 | 8.60E-01 | - |
| rs700753   | c | g | 0.35 | -0.006 | 0.035 | 8.63E-01 | - |
| rs17271340 | t | c | 0.41 | -0.006 | 0.035 | 8.64E-01 | - |
| rs700752   | c | g | 0.35 | -0.006 | 0.035 | 8.69E-01 | - |
| rs7178424  | t | c | 0.44 | -0.006 | 0.035 | 8.72E-01 | - |
| rs1436966  | a | g | 0.53 | 0.006  | 0.035 | 8.74E-01 | + |
| rs7178540  | a | g | 0.44 | -0.005 | 0.035 | 8.77E-01 | - |
| rs12442212 | a | c | 0.56 | 0.005  | 0.035 | 8.78E-01 | + |
| rs12439356 | t | c | 0.56 | 0.005  | 0.035 | 8.83E-01 | + |
| rs10519157 | t | g | 0.59 | 0.005  | 0.035 | 8.84E-01 | + |
| rs12910541 | t | c | 0.51 | 0.005  | 0.036 | 8.91E-01 | + |
| rs7177711  | a | g | 0.56 | 0.005  | 0.035 | 8.91E-01 | + |
| rs12442675 | a | g | 0.44 | -0.005 | 0.034 | 8.93E-01 | - |
| rs7178945  | t | c | 0.56 | 0.004  | 0.035 | 8.99E-01 | + |
| rs2042608  | a | c | 0.45 | -0.004 | 0.035 | 9.01E-01 | - |
| rs893156   | a | g | 0.44 | -0.004 | 0.035 | 9.02E-01 | - |
| rs891867   | a | g | 0.27 | -0.005 | 0.038 | 9.02E-01 | - |
| rs1917609  | t | c | 0.27 | -0.005 | 0.038 | 9.04E-01 | - |
| rs7177276  | t | c | 0.44 | -0.004 | 0.035 | 9.05E-01 | - |
| rs8039105  | t | c | 0.41 | -0.004 | 0.035 | 9.09E-01 | - |
| rs12899801 | a | g | 0.55 | 0.004  | 0.035 | 9.12E-01 | + |
| rs12593844 | t | c | 0.45 | -0.004 | 0.035 | 9.12E-01 | - |
| rs12439934 | a | g | 0.44 | -0.004 | 0.035 | 9.14E-01 | - |
| rs1490388  | t | c | 0.46 | -0.004 | 0.034 | 9.15E-01 | + |
| rs17587048 | t | c | 0.18 | -0.005 | 0.045 | 9.16E-01 | - |
| rs17205463 | t | c | 0.44 | -0.004 | 0.035 | 9.20E-01 | - |
| rs9398803  | a | g | 0.54 | -0.003 | 0.034 | 9.21E-01 | - |
| rs9375446  | a | g | 0.45 | -0.003 | 0.034 | 9.22E-01 | + |
| rs12594658 | a | g | 0.56 | 0.003  | 0.034 | 9.27E-01 | + |
| rs17271438 | a | c | 0.44 | -0.003 | 0.035 | 9.29E-01 | - |
| rs17271431 | t | c | 0.44 | -0.003 | 0.035 | 9.29E-01 | - |
| rs8025877  | a | t | 0.56 | 0.003  | 0.035 | 9.29E-01 | + |
| rs8026008  | t | c | 0.44 | -0.003 | 0.035 | 9.29E-01 | - |
| rs1907067  | a | c | 0.54 | 0.003  | 0.034 | 9.30E-01 | - |

|            |   |   |      |        |       |          |   |
|------------|---|---|------|--------|-------|----------|---|
| rs893158   | a | g | 0.44 | -0.003 | 0.035 | 9.30E-01 | - |
| rs856549   | t | c | 0.26 | 0.003  | 0.039 | 9.31E-01 | + |
| rs12592402 | a | g | 0.56 | 0.003  | 0.035 | 9.32E-01 | + |
| rs11633500 | a | g | 0.56 | 0.002  | 0.035 | 9.53E-01 | + |
| rs4775458  | t | g | 0.56 | 0.002  | 0.035 | 9.58E-01 | + |
| rs17205407 | a | g | 0.44 | -0.002 | 0.035 | 9.63E-01 | - |
| rs856575   | a | t | 0.50 | 0.002  | 0.040 | 9.63E-01 | - |
| rs12913951 | a | g | 0.56 | 0.002  | 0.035 | 9.64E-01 | + |
| rs856541   | t | c | 0.25 | -0.001 | 0.039 | 9.76E-01 | + |
| rs7162536  | t | g | 0.56 | 0.001  | 0.035 | 9.76E-01 | + |
| rs1436964  | a | g | 0.56 | 0.001  | 0.035 | 9.76E-01 | + |
| rs866488   | t | c | 0.75 | 0.001  | 0.039 | 9.81E-01 | - |
| rs1415671  | t | g | 0.54 | 0.001  | 0.034 | 9.81E-01 | - |
| rs17271403 | t | c | 0.44 | -0.001 | 0.035 | 9.83E-01 | - |
| rs856548   | a | g | 0.75 | 0.001  | 0.039 | 9.85E-01 | - |
| rs8039651  | t | c | 0.44 | 0.001  | 0.035 | 9.88E-01 | - |
| rs9398808  | t | g | 0.46 | -0.001 | 0.034 | 9.89E-01 | + |
| rs11635977 | t | c | 0.56 | 0.000  | 0.035 | 9.93E-01 | + |
| rs2568696  | t | g | 0.25 | 0.000  | 0.039 | 9.94E-01 | + |
| rs9385400  | t | g | 0.54 | 0.000  | 0.034 | 9.95E-01 | - |
| rs933807   | c | g | 0.44 | 0.000  | 0.034 | 9.96E-01 | - |
| rs4565329  | t | c | 0.46 | 0.000  | 0.034 | 9.98E-01 | + |
| rs1030859  | t | c | 0.44 | 0.000  | 0.035 | 9.99E-01 | - |
| rs856554   | t | c | 0.75 | 0.000  | 0.039 | 1.00E+00 | - |

"-": effect allele associated with lower IGF-I levels.

"+": effect allele associated with higher IGF-I levels.

Results for 13 independent SNPs defined based on LD (settings  $r^2 > 0.01$ , 1 Mb distance) are indicated by bold text.

**Supplementary Table 11: Lookup of Top IGFBP-3 associated SNPs in associations with survival  
beyond age 90 years old**

| SNP               | Effect allele | Other allele | Effect allele frequency | Effect        | SE           | p-value         | Effect direction for IGFBP-3 |
|-------------------|---------------|--------------|-------------------------|---------------|--------------|-----------------|------------------------------|
| <b>rs9398172</b>  | <b>a</b>      | <b>g</b>     | <b>0.70</b>             | <b>-0.133</b> | <b>0.036</b> | <b>2.54E-04</b> | <b>+</b>                     |
| rs1935949         | a             | g            | 0.30                    | 0.133         | 0.036        | 2.58E-04        | -                            |
| rs3800229         | t             | g            | 0.70                    | -0.133        | 0.036        | 2.59E-04        | +                            |
| rs1935952         | c             | g            | 0.70                    | -0.132        | 0.036        | 2.70E-04        | +                            |
| rs2153960         | a             | g            | 0.70                    | -0.130        | 0.036        | 3.19E-04        | +                            |
| rs4946935         | a             | g            | 0.29                    | 0.131         | 0.037        | 3.51E-04        | -                            |
| rs9398171         | t             | c            | 0.71                    | -0.130        | 0.037        | 4.02E-04        | +                            |
| <b>rs17425951</b> | <b>a</b>      | <b>g</b>     | <b>0.12</b>             | <b>-0.135</b> | <b>0.052</b> | <b>9.07E-03</b> | <b>+</b>                     |
| rs4340803         | a             | g            | 0.88                    | 0.136         | 0.052        | 9.11E-03        | -                            |
| rs17007509        | t             | c            | 0.88                    | 0.135         | 0.052        | 9.13E-03        | -                            |
| rs17007499        | a             | c            | 0.12                    | -0.134        | 0.052        | 1.02E-02        | +                            |
| rs17425479        | c             | g            | 0.88                    | 0.135         | 0.053        | 1.05E-02        | -                            |
| rs10518305        | t             | g            | 0.88                    | 0.133         | 0.052        | 1.06E-02        | +                            |
| rs17007484        | a             | c            | 0.88                    | 0.133         | 0.053        | 1.13E-02        | -                            |
| <b>rs10243669</b> | <b>t</b>      | <b>c</b>     | <b>0.84</b>             | <b>-0.113</b> | <b>0.046</b> | <b>1.43E-02</b> | <b>+</b>                     |
| rs12671484        | a             | g            | 0.84                    | -0.107        | 0.046        | 2.02E-02        | +                            |
| rs12671457        | a             | c            | 0.84                    | -0.106        | 0.046        | 2.16E-02        | +                            |
| rs1543270         | t             | c            | 0.47                    | -0.088        | 0.038        | 2.16E-02        | +                            |
| rs12673689        | a             | g            | 0.14                    | 0.106         | 0.049        | 3.02E-02        | -                            |
| <b>rs7795536</b>  | <b>a</b>      | <b>g</b>     | <b>0.17</b>             | <b>-0.101</b> | <b>0.047</b> | <b>3.08E-02</b> | <b>+</b>                     |
| rs9658239         | a             | g            | 0.86                    | -0.103        | 0.048        | 3.32E-02        | +                            |
| rs10249499        | a             | g            | 0.86                    | -0.103        | 0.049        | 3.49E-02        | +                            |
| <b>rs17587111</b> | <b>a</b>      | <b>g</b>     | <b>0.81</b>             | <b>0.104</b>  | <b>0.049</b> | <b>3.52E-02</b> | <b>-</b>                     |
| rs1874479         | a             | g            | 0.86                    | -0.101        | 0.048        | 3.65E-02        | +                            |
| rs12702233        | t             | c            | 0.68                    | 0.076         | 0.036        | 3.71E-02        | +                            |
| rs12535896        | c             | g            | 0.32                    | -0.076        | 0.036        | 3.74E-02        | -                            |
| rs10231774        | c             | g            | 0.14                    | 0.102         | 0.049        | 3.83E-02        | -                            |
| rs12540816        | a             | c            | 0.68                    | 0.074         | 0.036        | 4.23E-02        | +                            |
| rs6964144         | a             | g            | 0.32                    | -0.073        | 0.037        | 4.44E-02        | -                            |
| rs1722135         | a             | c            | 0.82                    | 0.080         | 0.045        | 7.49E-02        | -                            |
| <b>rs12325217</b> | <b>a</b>      | <b>t</b>     | <b>0.74</b>             | <b>-0.072</b> | <b>0.041</b> | <b>7.53E-02</b> | <b>+</b>                     |
| rs1722134         | a             | t            | 0.17                    | -0.078        | 0.045        | 8.21E-02        | +                            |
| rs1525829         | t             | c            | 0.17                    | -0.077        | 0.045        | 8.55E-02        | +                            |
| rs809297          | a             | g            | 0.83                    | 0.075         | 0.044        | 9.09E-02        | -                            |
| rs10233070        | t             | c            | 0.06                    | 0.129         | 0.077        | 9.56E-02        | -                            |
| rs1722146         | a             | g            | 0.83                    | 0.074         | 0.045        | 1.01E-01        | -                            |

|                   |          |          |             |               |              |                 |          |
|-------------------|----------|----------|-------------|---------------|--------------|-----------------|----------|
| rs1722147         | a        | g        | 0.83        | 0.074         | 0.045        | 1.01E-01        | -        |
| rs2464926         | t        | g        | 0.83        | 0.074         | 0.045        | 1.04E-01        | -        |
| rs977268          | a        | g        | 0.17        | 0.070         | 0.044        | 1.13E-01        | +        |
| rs10278715        | t        | g        | 0.67        | 0.057         | 0.036        | 1.14E-01        | +        |
| rs17172643        | t        | c        | 0.67        | 0.056         | 0.036        | 1.17E-01        | +        |
| rs11973257        | a        | g        | 0.83        | -0.069        | 0.044        | 1.18E-01        | -        |
| rs10266929        | a        | g        | 0.33        | -0.056        | 0.036        | 1.20E-01        | -        |
| rs1905992         | a        | g        | 0.67        | 0.055         | 0.036        | 1.23E-01        | +        |
| rs6463333         | a        | t        | 0.85        | -0.072        | 0.049        | 1.40E-01        | -        |
| rs2949308         | a        | c        | 0.39        | -0.057        | 0.039        | 1.43E-01        | +        |
| rs788773          | a        | g        | 0.77        | -0.060        | 0.041        | 1.44E-01        | +        |
| rs1496499         | t        | g        | 0.54        | 0.049         | 0.033        | 1.45E-01        | -        |
| rs788771          | t        | c        | 0.77        | -0.060        | 0.041        | 1.46E-01        | +        |
| rs2464927         | t        | c        | 0.23        | 0.059         | 0.041        | 1.47E-01        | -        |
| rs1722144         | t        | c        | 0.77        | -0.059        | 0.041        | 1.48E-01        | +        |
| rs337286          | t        | c        | 0.15        | 0.071         | 0.049        | 1.48E-01        | -        |
| rs1852210         | a        | g        | 0.46        | -0.048        | 0.034        | 1.57E-01        | +        |
| rs1657129         | a        | g        | 0.16        | 0.074         | 0.052        | 1.58E-01        | -        |
| rs788783          | t        | c        | 0.26        | 0.056         | 0.040        | 1.58E-01        | -        |
| rs2949838         | t        | c        | 0.54        | 0.047         | 0.034        | 1.61E-01        | -        |
| rs1542818         | t        | g        | 0.46        | -0.047        | 0.033        | 1.63E-01        | +        |
| rs2965074         | t        | g        | 0.46        | -0.047        | 0.033        | 1.64E-01        | +        |
| rs2965072         | t        | g        | 0.46        | -0.047        | 0.033        | 1.64E-01        | +        |
| rs788728          | a        | g        | 0.22        | 0.061         | 0.044        | 1.64E-01        | -        |
| rs12538548        | a        | g        | 0.74        | -0.055        | 0.040        | 1.64E-01        | +        |
| rs788727          | t        | c        | 0.46        | -0.048        | 0.035        | 1.66E-01        | +        |
| rs788744          | t        | c        | 0.76        | -0.056        | 0.040        | 1.66E-01        | +        |
| rs924140          | t        | c        | 0.46        | -0.046        | 0.034        | 1.66E-01        | +        |
| rs17578201        | a        | g        | 0.23        | 0.056         | 0.041        | 1.69E-01        | -        |
| rs788735          | a        | g        | 0.23        | 0.055         | 0.040        | 1.70E-01        | -        |
| rs2690723         | a        | c        | 0.76        | -0.056        | 0.041        | 1.70E-01        | +        |
| rs1722124         | t        | g        | 0.23        | 0.055         | 0.040        | 1.72E-01        | -        |
| <b>rs12155236</b> | <b>t</b> | <b>c</b> | <b>0.08</b> | <b>-0.102</b> | <b>0.075</b> | <b>1.73E-01</b> | <b>-</b> |
| rs2270628         | t        | c        | 0.21        | 0.056         | 0.041        | 1.73E-01        | -        |
| rs9806826         | t        | c        | 0.29        | 0.050         | 0.037        | 1.74E-01        | -        |
| <b>rs943318</b>   | <b>a</b> | <b>g</b> | <b>0.67</b> | <b>-0.050</b> | <b>0.037</b> | <b>1.77E-01</b> | <b>+</b> |
| rs788734          | a        | c        | 0.23        | 0.053         | 0.040        | 1.82E-01        | -        |
| rs788732          | t        | c        | 0.77        | -0.053        | 0.040        | 1.83E-01        | +        |
| rs1722139         | a        | c        | 0.76        | -0.053        | 0.040        | 1.83E-01        | +        |
| rs788745          | t        | g        | 0.76        | -0.053        | 0.040        | 1.83E-01        | +        |
| rs788733          | c        | g        | 0.23        | 0.053         | 0.040        | 1.83E-01        | -        |
| rs788738          | t        | c        | 0.77        | -0.053        | 0.040        | 1.85E-01        | +        |



|            |   |   |      |        |       |          |   |
|------------|---|---|------|--------|-------|----------|---|
| rs7781417  | a | c | 0.84 | -0.061 | 0.046 | 1.85E-01 | - |
| rs2949837  | a | t | 0.67 | 0.050  | 0.038 | 1.86E-01 | - |
| rs2462326  | a | g | 0.77 | -0.053 | 0.040 | 1.86E-01 | + |
| rs2462688  | t | c | 0.46 | -0.046 | 0.035 | 1.86E-01 | + |
| rs788743   | a | g | 0.77 | -0.053 | 0.040 | 1.87E-01 | + |
| rs700744   | a | g | 0.23 | 0.053  | 0.040 | 1.87E-01 | - |
| rs337284   | a | c | 0.83 | -0.063 | 0.048 | 1.87E-01 | + |
| rs788736   | t | c | 0.23 | 0.053  | 0.040 | 1.88E-01 | - |
| rs1722122  | a | g | 0.23 | 0.053  | 0.040 | 1.88E-01 | - |
| rs13235531 | a | g | 0.84 | -0.060 | 0.046 | 1.88E-01 | - |
| rs1723917  | c | g | 0.23 | 0.053  | 0.040 | 1.89E-01 | - |
| rs11979093 | a | g | 0.16 | 0.061  | 0.046 | 1.89E-01 | + |
| rs788740   | a | g | 0.23 | 0.053  | 0.040 | 1.90E-01 | - |
| rs6955810  | t | g | 0.82 | -0.058 | 0.044 | 1.91E-01 | - |
| rs2949307  | t | c | 0.62 | -0.046 | 0.035 | 1.91E-01 | + |
| rs4255045  | t | c | 0.24 | 0.061  | 0.047 | 1.92E-01 | - |
| rs6463330  | a | t | 0.16 | 0.059  | 0.045 | 1.92E-01 | + |
| rs943319   | a | g | 0.32 | 0.049  | 0.037 | 1.94E-01 | - |
| rs7777076  | a | c | 0.16 | 0.059  | 0.045 | 1.95E-01 | + |
| rs1859520  | c | g | 0.84 | -0.059 | 0.045 | 1.96E-01 | - |
| rs956010   | a | g | 0.86 | 0.064  | 0.049 | 1.96E-01 | - |
| rs7778638  | a | g | 0.84 | -0.059 | 0.046 | 1.97E-01 | - |
| rs7793304  | a | g | 0.16 | 0.059  | 0.045 | 1.97E-01 | + |
| rs7788742  | a | g | 0.84 | -0.059 | 0.045 | 1.97E-01 | - |
| rs7781943  | t | c | 0.16 | 0.059  | 0.045 | 1.98E-01 | + |
| rs12112487 | a | g | 0.84 | -0.058 | 0.045 | 1.98E-01 | - |
| rs7806883  | a | t | 0.16 | 0.058  | 0.045 | 1.98E-01 | + |
| rs12113686 | t | g | 0.16 | 0.058  | 0.045 | 1.99E-01 | + |
| rs7783846  | a | g | 0.16 | 0.058  | 0.045 | 1.99E-01 | + |
| rs7808435  | a | t | 0.84 | -0.058 | 0.045 | 2.00E-01 | - |
| rs3890267  | a | g | 0.84 | -0.058 | 0.045 | 2.02E-01 | - |
| rs1657139  | t | c | 0.15 | 0.062  | 0.049 | 2.04E-01 | - |
| rs10275903 | t | g | 0.91 | -0.076 | 0.061 | 2.07E-01 | + |
| rs1722141  | a | g | 0.22 | 0.053  | 0.042 | 2.10E-01 | - |
| rs2960427  | a | g | 0.24 | 0.050  | 0.040 | 2.16E-01 | - |
| rs1535343  | t | c | 0.85 | -0.060 | 0.048 | 2.18E-01 | + |
| rs2091148  | a | g | 0.36 | -0.042 | 0.035 | 2.25E-01 | + |
| rs1657137  | t | c | 0.15 | 0.058  | 0.049 | 2.28E-01 | - |
| rs3110697  | a | g | 0.42 | 0.041  | 0.034 | 2.28E-01 | - |
| rs2492883  | a | g | 0.29 | 0.045  | 0.037 | 2.29E-01 | - |
| rs11977526 | a | g | 0.41 | -0.043 | 0.036 | 2.30E-01 | + |
| rs388928   | c | g | 0.71 | -0.045 | 0.038 | 2.34E-01 | + |

|            |   |   |      |        |       |          |   |
|------------|---|---|------|--------|-------|----------|---|
| rs2437744  | t | c | 0.71 | -0.045 | 0.037 | 2.34E-01 | + |
| rs2949833  | t | c | 0.32 | -0.045 | 0.038 | 2.37E-01 | + |
| rs2906912  | a | g | 0.15 | 0.058  | 0.049 | 2.38E-01 | - |
| rs2204488  | c | g | 0.37 | -0.042 | 0.036 | 2.40E-01 | + |
| rs788723   | t | c | 0.25 | 0.046  | 0.039 | 2.43E-01 | - |
| rs3185708  | a | g | 0.16 | -0.066 | 0.057 | 2.44E-01 | + |
| rs2982432  | t | c | 0.15 | 0.056  | 0.048 | 2.46E-01 | - |
| rs788724   | t | c | 0.25 | 0.045  | 0.039 | 2.46E-01 | - |
| rs2437745  | c | g | 0.71 | -0.043 | 0.037 | 2.47E-01 | + |
| rs173164   | a | g | 0.85 | -0.055 | 0.048 | 2.49E-01 | + |
| rs404772   | c | g | 0.85 | -0.062 | 0.054 | 2.53E-01 | + |
| rs1404161  | a | c | 0.46 | -0.039 | 0.034 | 2.54E-01 | + |
| rs788776   | t | g | 0.46 | -0.039 | 0.034 | 2.54E-01 | + |
| rs1722115  | c | g | 0.81 | -0.055 | 0.048 | 2.55E-01 | + |
| rs2949306  | t | c | 0.46 | -0.039 | 0.034 | 2.58E-01 | + |
| rs2960426  | c | g | 0.64 | 0.039  | 0.034 | 2.59E-01 | - |
| rs2917519  | a | c | 0.16 | 0.053  | 0.047 | 2.59E-01 | - |
| rs2982433  | a | g | 0.85 | -0.054 | 0.048 | 2.61E-01 | + |
| rs788729   | t | c | 0.75 | -0.044 | 0.039 | 2.62E-01 | + |
| rs1657133  | a | g | 0.84 | -0.053 | 0.047 | 2.63E-01 | + |
| rs10260816 | c | g | 0.56 | 0.039  | 0.035 | 2.63E-01 | - |
| rs788760   | a | g | 0.75 | -0.046 | 0.041 | 2.63E-01 | + |
| rs1525828  | a | t | 0.31 | 0.040  | 0.036 | 2.66E-01 | - |
| rs12596510 | a | g | 0.16 | 0.052  | 0.047 | 2.68E-01 | - |
| rs788764   | a | g | 0.75 | -0.045 | 0.041 | 2.69E-01 | + |
| rs2982447  | t | c | 0.84 | -0.052 | 0.047 | 2.70E-01 | + |
| rs788713   | t | c | 0.24 | 0.046  | 0.042 | 2.71E-01 | - |
| rs10499638 | a | c | 0.76 | -0.045 | 0.041 | 2.72E-01 | + |
| rs12532079 | t | g | 0.24 | 0.045  | 0.041 | 2.73E-01 | - |
| rs12599337 | t | c | 0.16 | 0.051  | 0.047 | 2.73E-01 | - |
| rs344363   | t | c | 0.15 | 0.056  | 0.051 | 2.73E-01 | - |
| rs1742462  | a | c | 0.84 | -0.051 | 0.047 | 2.75E-01 | + |
| rs6956126  | t | g | 0.15 | -0.051 | 0.047 | 2.78E-01 | + |
| rs1085924  | t | c | 0.24 | 0.044  | 0.041 | 2.79E-01 | - |
| rs788761   | c | g | 0.46 | -0.037 | 0.034 | 2.81E-01 | + |
| rs1742464  | t | c | 0.16 | 0.050  | 0.047 | 2.84E-01 | - |
| rs433268   | c | g | 0.16 | 0.058  | 0.054 | 2.85E-01 | - |
| rs911392   | t | c | 0.84 | -0.050 | 0.047 | 2.85E-01 | + |
| rs1496497  | t | g | 0.81 | -0.046 | 0.044 | 2.87E-01 | + |
| rs911391   | a | c | 0.16 | 0.050  | 0.047 | 2.87E-01 | - |
| rs1581571  | t | c | 0.47 | -0.035 | 0.034 | 2.91E-01 | + |
| rs7781438  | t | c | 0.52 | 0.036  | 0.034 | 2.92E-01 | - |

|            |   |   |      |        |       |          |   |
|------------|---|---|------|--------|-------|----------|---|
| rs1917615  | a | c | 0.22 | -0.046 | 0.043 | 2.93E-01 | - |
| rs427732   | c | g | 0.16 | 0.057  | 0.054 | 2.93E-01 | - |
| rs788725   | t | c | 0.48 | -0.035 | 0.033 | 2.94E-01 | + |
| rs788778   | a | g | 0.48 | -0.036 | 0.034 | 2.94E-01 | + |
| rs2982446  | t | c | 0.16 | 0.049  | 0.047 | 2.95E-01 | - |
| rs2965083  | t | c | 0.36 | -0.036 | 0.034 | 2.96E-01 | + |
| rs2462687  | t | c | 0.31 | 0.043  | 0.042 | 2.99E-01 | - |
| rs12325282 | t | g | 0.83 | -0.049 | 0.047 | 3.05E-01 | + |
| rs10255707 | t | c | 0.21 | 0.049  | 0.048 | 3.09E-01 | - |
| rs2464923  | a | g | 0.39 | 0.036  | 0.036 | 3.09E-01 | - |
| rs1496495  | t | c | 0.81 | -0.043 | 0.043 | 3.14E-01 | + |
| rs788762   | a | g | 0.26 | 0.041  | 0.041 | 3.14E-01 | - |
| rs1525816  | a | t | 0.86 | -0.055 | 0.055 | 3.15E-01 | + |
| rs3848346  | a | c | 0.15 | 0.047  | 0.047 | 3.19E-01 | - |
| rs11971230 | a | g | 0.92 | -0.063 | 0.063 | 3.19E-01 | - |
| rs10258520 | t | c | 0.98 | 0.133  | 0.134 | 3.20E-01 | + |
| rs2965071  | a | t | 0.68 | -0.036 | 0.036 | 3.21E-01 | + |
| rs3848348  | t | g | 0.85 | -0.047 | 0.047 | 3.22E-01 | + |
| rs788714   | t | c | 0.52 | 0.034  | 0.035 | 3.22E-01 | - |
| rs911396   | t | g | 0.26 | 0.065  | 0.066 | 3.22E-01 | - |
| rs2982235  | a | g | 0.85 | -0.047 | 0.048 | 3.23E-01 | + |
| rs3813760  | t | c | 0.16 | 0.047  | 0.047 | 3.23E-01 | - |
| rs1722108  | t | c | 0.39 | 0.035  | 0.036 | 3.23E-01 | - |
| rs1742421  | a | g | 0.15 | 0.053  | 0.053 | 3.23E-01 | - |
| rs11643835 | a | g | 0.84 | -0.046 | 0.047 | 3.24E-01 | + |
| rs2492881  | a | g | 0.85 | -0.048 | 0.049 | 3.25E-01 | + |
| rs9658238  | a | g | 0.81 | -0.042 | 0.043 | 3.25E-01 | + |
| rs17808002 | a | g | 0.06 | 0.076  | 0.077 | 3.25E-01 | + |
| rs9806787  | a | c | 0.15 | 0.046  | 0.047 | 3.26E-01 | - |
| rs12325141 | a | g | 0.85 | -0.046 | 0.047 | 3.26E-01 | + |
| rs9652777  | c | g | 0.84 | -0.046 | 0.047 | 3.27E-01 | + |
| rs9652786  | t | c | 0.84 | -0.046 | 0.047 | 3.28E-01 | + |
| rs17234242 | t | c | 0.06 | 0.076  | 0.077 | 3.28E-01 | + |
| rs2974856  | a | g | 0.85 | -0.047 | 0.048 | 3.28E-01 | + |
| rs977269   | a | g | 0.94 | -0.076 | 0.077 | 3.28E-01 | - |
| rs2471557  | c | g | 0.32 | 0.035  | 0.036 | 3.29E-01 | - |
| rs10278486 | t | c | 0.22 | 0.040  | 0.041 | 3.30E-01 | + |
| rs11980950 | t | c | 0.08 | 0.063  | 0.064 | 3.31E-01 | + |
| rs809298   | a | c | 0.32 | 0.035  | 0.036 | 3.33E-01 | - |
| rs1657095  | a | g | 0.15 | 0.046  | 0.048 | 3.33E-01 | - |
| rs2917523  | t | c | 0.15 | 0.046  | 0.048 | 3.33E-01 | - |
| rs11766515 | a | g | 0.85 | -0.048 | 0.050 | 3.35E-01 | + |

|            |   |   |      |        |       |          |   |
|------------|---|---|------|--------|-------|----------|---|
| rs1521469  | a | g | 0.15 | -0.049 | 0.051 | 3.37E-01 | + |
| rs17234277 | a | g | 0.94 | -0.075 | 0.078 | 3.37E-01 | - |
| rs6945214  | a | g | 0.06 | 0.074  | 0.078 | 3.38E-01 | + |
| rs788752   | a | g | 0.15 | 0.048  | 0.050 | 3.38E-01 | - |
| rs992768   | t | c | 0.92 | -0.062 | 0.065 | 3.39E-01 | - |
| rs11981723 | t | g | 0.94 | -0.074 | 0.078 | 3.39E-01 | - |
| rs788765   | c | g | 0.68 | -0.034 | 0.036 | 3.40E-01 | + |
| rs1525831  | t | c | 0.68 | -0.035 | 0.036 | 3.41E-01 | + |
| rs11248898 | a | g | 0.16 | 0.045  | 0.047 | 3.42E-01 | - |
| rs1657094  | t | c | 0.15 | 0.045  | 0.048 | 3.43E-01 | - |
| rs2462685  | a | g | 0.79 | -0.039 | 0.041 | 3.44E-01 | + |
| rs1525819  | c | g | 0.21 | 0.039  | 0.041 | 3.45E-01 | - |
| rs2965073  | t | g | 0.78 | -0.038 | 0.041 | 3.46E-01 | + |
| rs447782   | t | c | 0.85 | -0.045 | 0.048 | 3.47E-01 | + |
| rs344361   | t | c | 0.15 | 0.050  | 0.054 | 3.48E-01 | - |
| rs1722148  | a | c | 0.21 | 0.039  | 0.041 | 3.48E-01 | - |
| rs788751   | a | g | 0.15 | 0.046  | 0.050 | 3.52E-01 | - |
| rs788718   | a | g | 0.19 | 0.040  | 0.043 | 3.53E-01 | - |
| rs408286   | a | c | 0.15 | 0.048  | 0.052 | 3.53E-01 | - |
| rs453494   | t | c | 0.85 | -0.044 | 0.048 | 3.55E-01 | + |
| rs788768   | a | g | 0.79 | -0.038 | 0.041 | 3.57E-01 | + |
| rs2492886  | t | g | 0.85 | -0.044 | 0.047 | 3.59E-01 | + |
| rs6969255  | a | g | 0.61 | -0.033 | 0.036 | 3.59E-01 | + |
| rs788766   | a | g | 0.79 | -0.038 | 0.041 | 3.60E-01 | + |
| rs11640914 | a | g | 0.15 | 0.044  | 0.048 | 3.61E-01 | - |
| rs3743853  | a | g | 0.15 | 0.043  | 0.048 | 3.61E-01 | - |
| rs11640407 | a | t | 0.85 | -0.043 | 0.047 | 3.62E-01 | + |
| rs378201   | c | g | 0.85 | -0.044 | 0.048 | 3.63E-01 | + |
| rs2189922  | t | c | 0.06 | 0.071  | 0.079 | 3.63E-01 | + |
| rs6973777  | a | g | 0.06 | 0.071  | 0.078 | 3.65E-01 | + |
| rs404413   | t | c | 0.16 | 0.044  | 0.048 | 3.67E-01 | - |
| rs11642885 | t | c | 0.85 | -0.043 | 0.047 | 3.68E-01 | + |
| rs788749   | a | t | 0.86 | -0.046 | 0.051 | 3.69E-01 | + |
| rs9806945  | a | g | 0.85 | -0.042 | 0.047 | 3.69E-01 | + |
| rs2575359  | a | t | 0.85 | -0.042 | 0.047 | 3.72E-01 | + |
| rs17559    | a | g | 0.10 | -0.051 | 0.058 | 3.73E-01 | + |
| rs1657120  | t | c | 0.86 | -0.045 | 0.050 | 3.73E-01 | + |
| rs1534151  | a | g | 0.68 | -0.032 | 0.036 | 3.74E-01 | + |
| rs3817899  | c | g | 0.10 | -0.051 | 0.058 | 3.75E-01 | + |
| rs788716   | a | g | 0.81 | -0.038 | 0.043 | 3.76E-01 | + |
| rs940892   | t | c | 0.09 | 0.060  | 0.067 | 3.76E-01 | - |
| rs17172644 | t | c | 0.20 | -0.037 | 0.043 | 3.80E-01 | - |

|                  |          |          |             |              |              |                 |   |
|------------------|----------|----------|-------------|--------------|--------------|-----------------|---|
| rs2881018        | t        | c        | 0.06        | 0.069        | 0.078        | 3.80E-01        | + |
| rs17233934       | a        | g        | 0.06        | 0.068        | 0.078        | 3.82E-01        | + |
| rs1657116        | a        | g        | 0.85        | -0.041       | 0.047        | 3.84E-01        | + |
| rs6948362        | t        | c        | 0.04        | 0.077        | 0.089        | 3.87E-01        | + |
| rs856572         | t        | c        | 0.85        | 0.042        | 0.049        | 3.89E-01        | - |
| rs12325218       | t        | g        | 0.85        | -0.041       | 0.048        | 3.90E-01        | + |
| rs1625279        | a        | g        | 0.85        | -0.041       | 0.047        | 3.90E-01        | + |
| rs1742419        | t        | c        | 0.85        | -0.041       | 0.047        | 3.90E-01        | + |
| <b>rs1625393</b> | <b>a</b> | <b>g</b> | <b>0.15</b> | <b>0.041</b> | <b>0.047</b> | <b>3.92E-01</b> | - |
| rs12512052       | a        | g        | 0.32        | 0.037        | 0.043        | 3.92E-01        | + |
| rs2960438        | t        | c        | 0.19        | 0.037        | 0.043        | 3.93E-01        | - |
| rs1534150        | t        | c        | 0.68        | -0.031       | 0.036        | 3.94E-01        | + |
| rs12673906       | a        | t        | 0.31        | 0.033        | 0.038        | 3.95E-01        | - |
| rs2453836        | a        | g        | 0.81        | -0.041       | 0.048        | 3.95E-01        | + |
| rs8046750        | c        | g        | 0.15        | 0.047        | 0.055        | 3.97E-01        | - |
| rs788731         | a        | g        | 0.48        | -0.028       | 0.033        | 3.98E-01        | + |
| rs1723939        | t        | c        | 0.48        | -0.028       | 0.033        | 3.99E-01        | + |
| rs449530         | a        | g        | 0.15        | 0.040        | 0.048        | 3.99E-01        | - |
| rs788782         | a        | t        | 0.49        | 0.034        | 0.040        | 4.01E-01        | - |
| rs7781391        | c        | g        | 0.84        | -0.043       | 0.051        | 4.02E-01        | - |
| rs856588         | a        | g        | 0.15        | -0.041       | 0.049        | 4.02E-01        | + |
| rs1486173        | t        | g        | 0.90        | 0.048        | 0.057        | 4.03E-01        | + |
| rs1589896        | a        | g        | 0.49        | -0.032       | 0.038        | 4.03E-01        | + |
| rs1657122        | t        | c        | 0.85        | -0.040       | 0.048        | 4.04E-01        | + |
| rs1742432        | t        | c        | 0.85        | -0.040       | 0.048        | 4.04E-01        | + |
| rs1657121        | a        | g        | 0.15        | 0.040        | 0.048        | 4.05E-01        | - |
| rs448374         | a        | g        | 0.15        | 0.040        | 0.048        | 4.05E-01        | - |
| rs410465         | a        | t        | 0.15        | 0.040        | 0.048        | 4.05E-01        | - |
| rs12112098       | a        | g        | 0.86        | 0.049        | 0.059        | 4.06E-01        | - |
| rs2754187        | a        | c        | 0.85        | -0.040       | 0.048        | 4.06E-01        | + |
| rs411193         | t        | c        | 0.85        | -0.040       | 0.048        | 4.06E-01        | + |
| rs448961         | a        | g        | 0.15        | 0.040        | 0.048        | 4.06E-01        | - |
| rs420681         | a        | g        | 0.85        | -0.040       | 0.048        | 4.06E-01        | + |
| rs428123         | a        | g        | 0.85        | -0.040       | 0.048        | 4.06E-01        | + |
| rs260347         | t        | c        | 0.96        | -0.074       | 0.089        | 4.06E-01        | - |
| rs1742431        | a        | c        | 0.15        | 0.039        | 0.048        | 4.07E-01        | - |
| rs260348         | a        | g        | 0.96        | -0.074       | 0.089        | 4.08E-01        | - |
| rs2754186        | a        | g        | 0.85        | -0.039       | 0.048        | 4.08E-01        | + |
| rs856551         | a        | c        | 0.15        | -0.040       | 0.049        | 4.09E-01        | + |
| rs2471553        | a        | g        | 0.69        | -0.030       | 0.036        | 4.11E-01        | + |
| rs7199384        | a        | g        | 0.15        | 0.039        | 0.047        | 4.11E-01        | - |
| rs6955849        | a        | c        | 0.27        | -0.037       | 0.045        | 4.12E-01        | - |

|            |   |   |      |        |       |          |   |
|------------|---|---|------|--------|-------|----------|---|
| rs903889   | t | g | 0.78 | -0.033 | 0.040 | 4.12E-01 | + |
| rs6820163  | a | c | 0.82 | 0.044  | 0.053 | 4.12E-01 | + |
| rs2754189  | a | c | 0.15 | 0.039  | 0.048 | 4.12E-01 | - |
| rs1617255  | t | c | 0.15 | 0.039  | 0.047 | 4.12E-01 | - |
| rs1742429  | t | c | 0.85 | -0.039 | 0.047 | 4.14E-01 | + |
| rs1657117  | t | c | 0.15 | 0.039  | 0.047 | 4.15E-01 | - |
| rs11643973 | t | c | 0.15 | 0.039  | 0.047 | 4.15E-01 | - |
| rs11643972 | t | g | 0.15 | 0.039  | 0.047 | 4.15E-01 | - |
| rs1742426  | c | g | 0.15 | 0.039  | 0.047 | 4.16E-01 | - |
| rs1742423  | c | g | 0.85 | -0.039 | 0.047 | 4.16E-01 | + |
| rs1657118  | t | c | 0.85 | -0.039 | 0.047 | 4.17E-01 | + |
| rs2471552  | t | c | 0.78 | -0.033 | 0.040 | 4.17E-01 | + |
| rs9648082  | t | c | 0.16 | 0.040  | 0.049 | 4.18E-01 | - |
| rs1742422  | a | g | 0.15 | 0.038  | 0.047 | 4.19E-01 | - |
| rs788741   | a | c | 0.48 | -0.027 | 0.033 | 4.19E-01 | + |
| rs788739   | t | c | 0.48 | -0.027 | 0.033 | 4.20E-01 | + |
| rs1525832  | a | g | 0.54 | 0.031  | 0.039 | 4.20E-01 | - |
| rs1178435  | t | c | 0.16 | 0.037  | 0.045 | 4.20E-01 | - |
| rs2345016  | t | g | 0.79 | -0.034 | 0.042 | 4.22E-01 | - |
| rs1742428  | a | g | 0.15 | 0.038  | 0.047 | 4.23E-01 | - |
| rs260346   | t | c | 0.96 | -0.071 | 0.089 | 4.25E-01 | - |
| rs2132572  | t | c | 0.22 | 0.032  | 0.040 | 4.25E-01 | - |
| rs2132571  | t | c | 0.31 | 0.029  | 0.036 | 4.26E-01 | - |
| rs11770622 | t | c | 0.16 | 0.036  | 0.046 | 4.30E-01 | - |
| rs788715   | t | c | 0.52 | 0.030  | 0.039 | 4.33E-01 | - |
| rs9648084  | t | g | 0.12 | 0.041  | 0.053 | 4.33E-01 | - |
| rs2268670  | t | c | 0.15 | 0.037  | 0.047 | 4.33E-01 | - |
| rs4720544  | t | c | 0.21 | 0.032  | 0.042 | 4.42E-01 | + |
| rs2815304  | a | g | 0.15 | 0.055  | 0.072 | 4.43E-01 | + |
| rs6944635  | a | g | 0.80 | -0.033 | 0.042 | 4.43E-01 | + |
| rs856539   | c | g | 0.79 | 0.036  | 0.046 | 4.43E-01 | - |
| rs2965069  | t | c | 0.34 | -0.027 | 0.035 | 4.43E-01 | + |
| rs6970565  | t | c | 0.61 | 0.027  | 0.035 | 4.47E-01 | + |
| rs6950179  | t | c | 0.39 | -0.026 | 0.035 | 4.50E-01 | - |
| rs6961418  | a | g | 0.20 | -0.032 | 0.042 | 4.51E-01 | - |
| rs1077750  | t | c | 0.61 | 0.026  | 0.035 | 4.53E-01 | + |
| rs260361   | a | g | 0.20 | 0.032  | 0.042 | 4.53E-01 | + |
| rs260368   | a | c | 0.79 | -0.031 | 0.042 | 4.53E-01 | - |
| rs2116643  | c | g | 0.36 | 0.026  | 0.035 | 4.55E-01 | + |
| rs7794166  | t | c | 0.39 | -0.026 | 0.035 | 4.55E-01 | - |
| rs260365   | a | g | 0.21 | 0.031  | 0.042 | 4.56E-01 | + |
| rs260363   | t | c | 0.20 | 0.031  | 0.042 | 4.59E-01 | + |

|            |   |   |      |        |       |          |   |
|------------|---|---|------|--------|-------|----------|---|
| rs12537178 | a | g | 0.22 | -0.031 | 0.042 | 4.62E-01 | - |
| rs7788288  | c | g | 0.39 | -0.026 | 0.035 | 4.63E-01 | - |
| rs9655050  | c | g | 0.12 | 0.039  | 0.053 | 4.65E-01 | - |
| rs260369   | a | t | 0.04 | 0.066  | 0.090 | 4.65E-01 | + |
| rs788711   | t | c | 0.26 | 0.028  | 0.039 | 4.73E-01 | - |
| rs11760757 | a | g | 0.97 | 0.080  | 0.112 | 4.78E-01 | + |
| rs9993     | a | g | 0.83 | 0.032  | 0.045 | 4.81E-01 | - |
| rs4689639  | t | c | 0.31 | -0.025 | 0.036 | 4.84E-01 | - |
| rs4689637  | a | g | 0.31 | -0.025 | 0.036 | 4.85E-01 | - |
| rs10020957 | a | g | 0.41 | -0.024 | 0.034 | 4.86E-01 | - |
| rs1004028  | t | c | 0.83 | 0.032  | 0.046 | 4.88E-01 | - |
| rs788717   | t | c | 0.78 | -0.029 | 0.041 | 4.89E-01 | + |
| rs1178436  | t | c | 0.18 | 0.030  | 0.044 | 4.94E-01 | - |
| rs11644716 | t | c | 0.95 | 0.059  | 0.086 | 4.95E-01 | - |
| rs788754   | t | g | 0.24 | 0.027  | 0.040 | 4.99E-01 | - |
| rs4689667  | a | t | 0.30 | -0.027 | 0.040 | 5.01E-01 | - |
| rs17172610 | a | g | 0.17 | -0.030 | 0.046 | 5.05E-01 | + |
| rs788748   | a | g | 0.50 | 0.022  | 0.033 | 5.06E-01 | - |
| rs260356   | t | c | 0.96 | -0.058 | 0.088 | 5.08E-01 | - |
| rs17492975 | t | c | 0.17 | 0.035  | 0.053 | 5.09E-01 | - |
| rs856567   | c | g | 0.57 | 0.022  | 0.034 | 5.12E-01 | + |
| rs13244568 | t | c | 0.13 | 0.034  | 0.052 | 5.14E-01 | - |
| rs13230270 | t | c | 0.61 | 0.022  | 0.035 | 5.21E-01 | + |
| rs2461127  | a | g | 0.42 | 0.022  | 0.034 | 5.27E-01 | + |
| rs2471271  | a | g | 0.41 | 0.022  | 0.035 | 5.30E-01 | + |
| rs11767059 | t | c | 0.19 | -0.027 | 0.044 | 5.32E-01 | - |
| rs2935265  | t | c | 0.52 | 0.026  | 0.043 | 5.45E-01 | + |
| rs2471267  | t | c | 0.42 | 0.021  | 0.034 | 5.46E-01 | + |
| rs11767935 | t | c | 0.12 | 0.032  | 0.053 | 5.47E-01 | - |
| rs10499642 | t | c | 0.18 | 0.026  | 0.043 | 5.49E-01 | - |
| rs4724427  | c | g | 0.19 | -0.026 | 0.044 | 5.49E-01 | - |
| rs12597803 | t | c | 0.14 | 0.034  | 0.056 | 5.50E-01 | - |
| rs7781162  | c | g | 0.13 | 0.031  | 0.052 | 5.51E-01 | - |
| rs3735666  | a | c | 0.83 | 0.027  | 0.045 | 5.51E-01 | - |
| rs7780838  | t | g | 0.13 | 0.031  | 0.052 | 5.52E-01 | - |
| rs1521470  | a | g | 0.15 | -0.034 | 0.058 | 5.57E-01 | + |
| rs1486170  | a | g | 0.62 | 0.020  | 0.034 | 5.59E-01 | + |
| rs11982719 | c | g | 0.16 | -0.027 | 0.047 | 5.67E-01 | + |
| rs1486171  | a | t | 0.62 | 0.020  | 0.035 | 5.67E-01 | + |
| rs2471551  | c | g | 0.20 | 0.024  | 0.042 | 5.68E-01 | - |
| rs1532663  | t | c | 0.65 | 0.026  | 0.045 | 5.70E-01 | + |
| rs4689085  | t | c | 0.28 | -0.022 | 0.038 | 5.72E-01 | - |

|                   |          |          |             |              |              |                 |   |
|-------------------|----------|----------|-------------|--------------|--------------|-----------------|---|
| rs1464930         | a        | g        | 0.81        | -0.024       | 0.043        | 5.73E-01        | + |
| rs7808776         | t        | c        | 0.12        | 0.030        | 0.053        | 5.75E-01        | - |
| rs7792950         | a        | g        | 0.61        | 0.019        | 0.035        | 5.77E-01        | + |
| rs6944785         | t        | c        | 0.18        | 0.024        | 0.044        | 5.77E-01        | - |
| rs7791503         | t        | c        | 0.27        | 0.022        | 0.039        | 5.80E-01        | - |
| rs11978000        | t        | c        | 0.17        | -0.026       | 0.047        | 5.80E-01        | + |
| rs11772890        | a        | g        | 0.61        | 0.019        | 0.035        | 5.80E-01        | + |
| rs12754           | t        | g        | 0.83        | 0.025        | 0.045        | 5.81E-01        | - |
| rs951449          | t        | c        | 0.53        | 0.020        | 0.036        | 5.82E-01        | + |
| rs10277696        | a        | g        | 0.12        | 0.030        | 0.055        | 5.83E-01        | - |
| rs11764490        | a        | g        | 0.88        | -0.028       | 0.051        | 5.86E-01        | + |
| rs10253036        | t        | c        | 0.12        | 0.029        | 0.053        | 5.87E-01        | - |
| rs1486167         | a        | t        | 0.88        | 0.030        | 0.055        | 5.88E-01        | + |
| rs4999732         | a        | g        | 0.40        | -0.028       | 0.051        | 5.88E-01        | - |
| rs6463347         | a        | c        | 0.71        | 0.021        | 0.039        | 5.89E-01        | - |
| rs260362          | a        | g        | 0.09        | 0.034        | 0.063        | 5.89E-01        | + |
| rs2471554         | t        | g        | 0.81        | -0.023       | 0.043        | 5.90E-01        | + |
| rs260366          | t        | g        | 0.91        | -0.034       | 0.063        | 5.91E-01        | - |
| rs260367          | a        | c        | 0.09        | 0.034        | 0.063        | 5.94E-01        | + |
| rs1872588         | a        | g        | 0.80        | 0.026        | 0.048        | 5.95E-01        | + |
| rs1723957         | t        | c        | 0.76        | -0.021       | 0.040        | 5.97E-01        | + |
| rs7800989         | t        | c        | 0.13        | 0.027        | 0.052        | 6.01E-01        | - |
| rs13240808        | a        | g        | 0.87        | -0.027       | 0.052        | 6.04E-01        | + |
| rs904978          | a        | g        | 0.62        | -0.018       | 0.035        | 6.08E-01        | - |
| rs17172765        | c        | g        | 0.21        | -0.022       | 0.044        | 6.09E-01        | - |
| rs10240695        | a        | c        | 0.63        | -0.018       | 0.035        | 6.10E-01        | - |
| rs856589          | a        | g        | 0.32        | -0.018       | 0.036        | 6.11E-01        | + |
| rs856540          | a        | g        | 0.37        | -0.019       | 0.036        | 6.11E-01        | - |
| rs4689088         | a        | g        | 0.61        | 0.017        | 0.034        | 6.14E-01        | + |
| rs788720          | t        | c        | 0.36        | 0.018        | 0.036        | 6.17E-01        | - |
| rs344357          | c        | g        | 0.16        | 0.023        | 0.047        | 6.21E-01        | - |
| rs260359          | a        | c        | 0.06        | 0.036        | 0.072        | 6.23E-01        | + |
| rs10256378        | t        | c        | 0.80        | 0.021        | 0.043        | 6.25E-01        | + |
| rs1486162         | a        | g        | 0.87        | 0.025        | 0.051        | 6.26E-01        | + |
| rs7789988         | a        | c        | 0.25        | 0.019        | 0.039        | 6.26E-01        | - |
| rs4234797         | a        | g        | 0.61        | 0.017        | 0.034        | 6.26E-01        | + |
| rs10255992        | t        | c        | 0.13        | -0.025       | 0.052        | 6.29E-01        | - |
| rs6967436         | a        | g        | 0.19        | -0.025       | 0.052        | 6.30E-01        | - |
| rs2575352         | a        | g        | 0.15        | 0.023        | 0.048        | 6.31E-01        | - |
| <b>rs11248888</b> | <b>c</b> | <b>g</b> | <b>0.89</b> | <b>0.027</b> | <b>0.056</b> | <b>6.33E-01</b> | - |
| rs2280497         | a        | g        | 0.83        | 0.022        | 0.047        | 6.35E-01        | - |
| rs1486163         | c        | g        | 0.87        | 0.025        | 0.052        | 6.36E-01        | + |



|            |   |   |      |        |       |          |   |
|------------|---|---|------|--------|-------|----------|---|
| rs10267258 | t | c | 0.87 | 0.025  | 0.052 | 6.39E-01 | + |
| rs4234798  | t | g | 0.39 | -0.016 | 0.034 | 6.39E-01 | - |
| rs11761115 | a | g | 0.13 | 0.024  | 0.052 | 6.43E-01 | - |
| rs17172634 | a | g | 0.87 | 0.024  | 0.052 | 6.44E-01 | + |
| rs17172602 | t | c | 0.17 | -0.021 | 0.046 | 6.44E-01 | + |
| rs11766906 | a | g | 0.77 | -0.018 | 0.040 | 6.54E-01 | + |
| rs11766636 | a | g | 0.13 | -0.023 | 0.052 | 6.54E-01 | - |
| rs788709   | t | c | 0.09 | 0.032  | 0.074 | 6.63E-01 | - |
| rs6975330  | a | c | 0.63 | 0.015  | 0.035 | 6.67E-01 | - |
| rs11767621 | a | g | 0.79 | 0.019  | 0.046 | 6.72E-01 | + |
| rs11764339 | a | g | 0.23 | 0.017  | 0.040 | 6.73E-01 | - |
| rs2453849  | a | g | 0.27 | 0.017  | 0.041 | 6.74E-01 | - |
| rs1486161  | a | g | 0.87 | 0.021  | 0.051 | 6.77E-01 | + |
| rs11760834 | a | t | 0.12 | 0.022  | 0.053 | 6.77E-01 | - |
| rs344359   | t | c | 0.17 | 0.019  | 0.046 | 6.78E-01 | - |
| rs2575351  | c | g | 0.83 | -0.021 | 0.052 | 6.78E-01 | + |
| rs2965077  | a | g | 0.55 | 0.014  | 0.034 | 6.79E-01 | - |
| rs2294619  | a | g | 0.82 | -0.018 | 0.044 | 6.79E-01 | + |
| rs12920634 | t | c | 0.11 | -0.023 | 0.056 | 6.84E-01 | + |
| rs2140917  | c | g | 0.16 | -0.020 | 0.049 | 6.84E-01 | - |
| rs957755   | t | g | 0.19 | -0.018 | 0.044 | 6.89E-01 | - |
| rs700750   | a | c | 0.62 | 0.014  | 0.035 | 6.89E-01 | + |
| rs7794677  | t | c | 0.76 | -0.016 | 0.040 | 6.89E-01 | + |
| rs12596094 | t | g | 0.84 | -0.020 | 0.050 | 6.94E-01 | + |
| rs12597098 | t | c | 0.16 | 0.020  | 0.050 | 6.95E-01 | - |
| rs2008103  | a | c | 0.22 | -0.016 | 0.041 | 6.97E-01 | - |
| rs12501357 | t | c | 0.38 | 0.014  | 0.035 | 6.98E-01 | + |
| rs1404160  | t | g | 0.76 | -0.016 | 0.040 | 6.99E-01 | + |
| rs10937793 | t | c | 0.36 | 0.014  | 0.036 | 6.99E-01 | + |
| rs7661066  | t | c | 0.38 | 0.014  | 0.035 | 6.99E-01 | + |
| rs7661077  | t | c | 0.38 | 0.013  | 0.035 | 7.01E-01 | + |
| rs2960429  | c | g | 0.45 | -0.013 | 0.034 | 7.05E-01 | + |
| rs13247207 | t | c | 0.12 | 0.020  | 0.053 | 7.07E-01 | - |
| rs11769597 | t | c | 0.81 | 0.016  | 0.044 | 7.08E-01 | + |
| rs856560   | t | c | 0.38 | -0.013 | 0.034 | 7.10E-01 | - |
| rs856563   | t | c | 0.38 | -0.013 | 0.034 | 7.11E-01 | - |
| rs1065663  | a | g | 0.83 | -0.017 | 0.046 | 7.15E-01 | + |
| rs1178432  | t | c | 0.12 | 0.021  | 0.058 | 7.17E-01 | - |
| rs4689651  | c | g | 0.21 | -0.015 | 0.043 | 7.22E-01 | - |
| rs2965082  | a | c | 0.46 | -0.012 | 0.033 | 7.23E-01 | + |
| rs1917611  | a | c | 0.27 | -0.014 | 0.038 | 7.23E-01 | + |
| rs4724487  | a | g | 0.73 | 0.013  | 0.038 | 7.24E-01 | + |

|                  |          |          |             |               |              |                 |          |
|------------------|----------|----------|-------------|---------------|--------------|-----------------|----------|
| rs12533001       | t        | g        | 0.19        | -0.016        | 0.046        | 7.26E-01        | -        |
| rs11860469       | t        | c        | 0.93        | 0.024         | 0.068        | 7.27E-01        | -        |
| rs12595860       | t        | c        | 0.14        | 0.021         | 0.061        | 7.28E-01        | -        |
| rs1525238        | a        | g        | 0.27        | -0.013        | 0.038        | 7.29E-01        | +        |
| rs879965         | t        | c        | 0.54        | 0.011         | 0.033        | 7.32E-01        | -        |
| rs1065656        | c        | g        | 0.30        | 0.013         | 0.038        | 7.33E-01        | -        |
| rs10228265       | a        | g        | 0.69        | 0.012         | 0.036        | 7.34E-01        | +        |
| rs10254077       | t        | c        | 0.08        | -0.021        | 0.064        | 7.39E-01        | -        |
| rs1875341        | a        | g        | 0.45        | -0.011        | 0.034        | 7.40E-01        | -        |
| rs12535368       | a        | g        | 0.27        | -0.013        | 0.038        | 7.40E-01        | -        |
| rs12152570       | t        | c        | 0.38        | 0.011         | 0.035        | 7.45E-01        | +        |
| rs1352090        | c        | g        | 0.62        | 0.011         | 0.035        | 7.46E-01        | +        |
| rs4724488        | a        | g        | 0.27        | -0.012        | 0.038        | 7.51E-01        | -        |
| rs17259858       | t        | c        | 0.73        | 0.012         | 0.038        | 7.51E-01        | +        |
| rs11865665       | a        | g        | 0.93        | 0.021         | 0.068        | 7.54E-01        | -        |
| <b>rs1385939</b> | <b>t</b> | <b>g</b> | <b>0.23</b> | <b>-0.014</b> | <b>0.044</b> | <b>7.55E-01</b> | <b>+</b> |
| rs6852212        | c        | g        | 0.21        | -0.014        | 0.044        | 7.55E-01        | -        |
| rs879966         | t        | g        | 0.60        | 0.010         | 0.034        | 7.60E-01        | +        |
| rs11859266       | c        | g        | 0.93        | 0.021         | 0.068        | 7.61E-01        | -        |
| rs2049397        | a        | g        | 0.13        | -0.016        | 0.052        | 7.63E-01        | -        |
| rs10229581       | t        | c        | 0.23        | 0.013         | 0.042        | 7.64E-01        | -        |
| rs10085433       | a        | c        | 0.13        | 0.015         | 0.052        | 7.72E-01        | -        |
| rs10081205       | t        | c        | 0.15        | -0.015        | 0.052        | 7.74E-01        | -        |
| rs1742458        | c        | g        | 0.93        | 0.019         | 0.068        | 7.76E-01        | -        |
| rs17172768       | a        | g        | 0.23        | 0.012         | 0.042        | 7.77E-01        | -        |
| rs856565         | a        | c        | 0.27        | -0.011        | 0.038        | 7.77E-01        | +        |
| rs17172769       | c        | g        | 0.23        | 0.012         | 0.042        | 7.79E-01        | -        |
| rs856569         | a        | g        | 0.26        | -0.011        | 0.039        | 7.83E-01        | +        |
| rs17172767       | t        | c        | 0.77        | -0.011        | 0.042        | 7.89E-01        | +        |
| rs878024         | t        | c        | 0.27        | -0.010        | 0.038        | 7.93E-01        | -        |
| rs1864858        | a        | g        | 0.32        | -0.010        | 0.037        | 7.95E-01        | +        |
| rs11770444       | t        | c        | 0.85        | -0.012        | 0.047        | 7.99E-01        | +        |
| rs856568         | a        | t        | 0.74        | 0.010         | 0.038        | 8.00E-01        | -        |
| rs2473466        | a        | g        | 0.60        | 0.009         | 0.035        | 8.03E-01        | +        |
| rs13246216       | a        | c        | 0.85        | -0.012        | 0.048        | 8.08E-01        | +        |
| rs1742424        | a        | g        | 0.06        | -0.017        | 0.068        | 8.08E-01        | +        |
| rs6944270        | t        | c        | 0.60        | 0.011         | 0.045        | 8.11E-01        | +        |
| rs12702194       | a        | g        | 0.13        | -0.012        | 0.052        | 8.12E-01        | -        |
| rs12333578       | a        | g        | 0.15        | 0.011         | 0.047        | 8.13E-01        | -        |
| rs13232034       | a        | g        | 0.13        | -0.012        | 0.053        | 8.15E-01        | -        |
| rs7782135        | t        | c        | 0.73        | 0.009         | 0.038        | 8.18E-01        | +        |
| rs7787941        | t        | c        | 0.85        | -0.011        | 0.048        | 8.22E-01        | +        |

|                  |          |          |             |               |              |                 |          |
|------------------|----------|----------|-------------|---------------|--------------|-----------------|----------|
| rs10951846       | a        | t        | 0.26        | 0.010         | 0.044        | 8.22E-01        | -        |
| rs10807932       | a        | t        | 0.62        | 0.008         | 0.035        | 8.23E-01        | +        |
| rs7804883        | a        | g        | 0.85        | -0.011        | 0.048        | 8.23E-01        | +        |
| rs13231830       | c        | g        | 0.86        | 0.012         | 0.052        | 8.25E-01        | +        |
| rs10263950       | t        | g        | 0.15        | 0.011         | 0.048        | 8.25E-01        | -        |
| rs12154951       | c        | g        | 0.86        | 0.011         | 0.052        | 8.27E-01        | +        |
| rs2575369        | t        | c        | 0.57        | 0.008         | 0.036        | 8.32E-01        | +        |
| rs856559         | a        | g        | 0.27        | -0.008        | 0.038        | 8.39E-01        | +        |
| rs13232036       | a        | t        | 0.15        | 0.010         | 0.047        | 8.39E-01        | -        |
| rs10243028       | a        | c        | 0.85        | -0.010        | 0.048        | 8.39E-01        | +        |
| rs4689671        | a        | g        | 0.58        | 0.009         | 0.043        | 8.40E-01        | +        |
| <b>rs7185434</b> | <b>a</b> | <b>t</b> | <b>0.04</b> | <b>-0.027</b> | <b>0.134</b> | <b>8.40E-01</b> | <b>+</b> |
| rs6946867        | a        | t        | 0.85        | -0.010        | 0.049        | 8.41E-01        | +        |
| rs13244644       | c        | g        | 0.86        | 0.010         | 0.052        | 8.41E-01        | +        |
| rs2280496        | c        | g        | 0.79        | 0.008         | 0.041        | 8.41E-01        | +        |
| rs2222627        | t        | c        | 0.14        | -0.010        | 0.052        | 8.44E-01        | -        |
| rs6959938        | a        | g        | 0.15        | 0.009         | 0.047        | 8.45E-01        | -        |
| rs10233512       | t        | g        | 0.79        | 0.009         | 0.045        | 8.47E-01        | +        |
| rs6942846        | t        | c        | 0.92        | -0.013        | 0.067        | 8.47E-01        | +        |
| rs949941         | a        | g        | 0.77        | -0.008        | 0.042        | 8.48E-01        | +        |
| rs10807931       | a        | c        | 0.85        | -0.009        | 0.047        | 8.49E-01        | +        |
| rs10231485       | t        | c        | 0.14        | -0.010        | 0.052        | 8.49E-01        | -        |
| rs1525827        | a        | g        | 0.15        | 0.009         | 0.047        | 8.50E-01        | -        |
| rs1525826        | a        | g        | 0.15        | 0.009         | 0.047        | 8.51E-01        | -        |
| rs17172757       | a        | c        | 0.08        | -0.012        | 0.063        | 8.51E-01        | -        |
| rs6954637        | a        | c        | 0.14        | -0.010        | 0.052        | 8.53E-01        | -        |
| rs2235648        | a        | c        | 0.60        | 0.007         | 0.035        | 8.54E-01        | +        |
| rs13244360       | a        | g        | 0.86        | 0.010         | 0.052        | 8.55E-01        | +        |
| rs10081257       | t        | c        | 0.86        | 0.010         | 0.052        | 8.55E-01        | +        |
| rs6975917        | t        | c        | 0.85        | -0.008        | 0.047        | 8.57E-01        | +        |
| rs949795         | a        | g        | 0.86        | 0.009         | 0.052        | 8.58E-01        | +        |
| rs10081377       | a        | g        | 0.86        | 0.009         | 0.052        | 8.58E-01        | +        |
| rs12149777       | a        | g        | 0.60        | 0.006         | 0.035        | 8.58E-01        | +        |
| rs7776585        | a        | t        | 0.14        | -0.009        | 0.052        | 8.59E-01        | -        |
| rs12702234       | c        | g        | 0.32        | -0.006        | 0.036        | 8.59E-01        | +        |
| rs7792709        | c        | g        | 0.14        | -0.009        | 0.052        | 8.60E-01        | -        |
| rs10245478       | a        | g        | 0.14        | -0.009        | 0.052        | 8.60E-01        | -        |
| rs1818943        | t        | c        | 0.86        | 0.009         | 0.052        | 8.60E-01        | +        |
| rs10232458       | t        | c        | 0.87        | 0.009         | 0.051        | 8.60E-01        | +        |
| rs6951099        | t        | c        | 0.85        | -0.009        | 0.054        | 8.62E-01        | +        |
| rs1030640        | a        | g        | 0.92        | 0.011         | 0.063        | 8.63E-01        | +        |
| rs7799370        | a        | g        | 0.14        | -0.009        | 0.052        | 8.63E-01        | -        |

|                  |          |          |             |               |              |                 |          |
|------------------|----------|----------|-------------|---------------|--------------|-----------------|----------|
| rs700753         | c        | g        | 0.35        | -0.006        | 0.035        | 8.63E-01        | -        |
| rs700752         | c        | g        | 0.35        | -0.006        | 0.035        | 8.69E-01        | -        |
| rs1905993        | t        | c        | 0.09        | -0.010        | 0.058        | 8.69E-01        | -        |
| rs12670400       | t        | c        | 0.18        | 0.007         | 0.046        | 8.74E-01        | -        |
| rs7783023        | t        | c        | 0.14        | -0.008        | 0.052        | 8.77E-01        | -        |
| rs6945559        | t        | g        | 0.13        | -0.008        | 0.051        | 8.78E-01        | -        |
| rs7809174        | t        | c        | 0.14        | -0.008        | 0.052        | 8.79E-01        | -        |
| rs17503164       | a        | g        | 0.91        | 0.009         | 0.058        | 8.81E-01        | +        |
| rs10274544       | a        | g        | 0.86        | 0.008         | 0.052        | 8.81E-01        | +        |
| rs10263873       | c        | g        | 0.87        | 0.008         | 0.051        | 8.84E-01        | +        |
| rs856547         | t        | g        | 0.92        | 0.009         | 0.062        | 8.84E-01        | +        |
| rs6943602        | t        | g        | 0.87        | -0.007        | 0.051        | 8.86E-01        | +        |
| rs1525242        | a        | c        | 0.92        | 0.009         | 0.063        | 8.86E-01        | +        |
| rs17581802       | t        | c        | 0.09        | -0.008        | 0.059        | 8.88E-01        | -        |
| rs4493818        | c        | g        | 0.87        | -0.007        | 0.051        | 8.89E-01        | +        |
| rs6952108        | t        | c        | 0.92        | 0.008         | 0.063        | 8.93E-01        | +        |
| rs17172753       | t        | c        | 0.08        | -0.008        | 0.062        | 8.94E-01        | -        |
| rs11770996       | a        | g        | 0.92        | 0.008         | 0.062        | 8.96E-01        | +        |
| <b>rs1872589</b> | <b>a</b> | <b>g</b> | <b>0.09</b> | <b>-0.008</b> | <b>0.059</b> | <b>8.97E-01</b> | <b>-</b> |
| rs10262325       | t        | c        | 0.13        | 0.006         | 0.051        | 8.99E-01        | -        |
| rs10225606       | t        | c        | 0.15        | 0.006         | 0.049        | 9.02E-01        | -        |
| rs891867         | a        | g        | 0.27        | -0.005        | 0.038        | 9.02E-01        | -        |
| rs1917609        | t        | c        | 0.27        | -0.005        | 0.038        | 9.04E-01        | -        |
| rs12112847       | t        | c        | 0.68        | 0.004         | 0.036        | 9.05E-01        | -        |
| rs17172752       | a        | g        | 0.92        | 0.007         | 0.062        | 9.05E-01        | +        |
| rs17172754       | c        | g        | 0.92        | 0.007         | 0.062        | 9.12E-01        | +        |
| rs1554465        | a        | g        | 0.78        | 0.005         | 0.041        | 9.13E-01        | +        |
| rs260336         | a        | g        | 0.04        | 0.011         | 0.101        | 9.14E-01        | +        |
| rs17587048       | t        | c        | 0.18        | -0.005        | 0.045        | 9.16E-01        | -        |
| rs856543         | a        | g        | 0.92        | 0.007         | 0.062        | 9.16E-01        | +        |
| rs13228392       | a        | g        | 0.08        | 0.007         | 0.062        | 9.16E-01        | -        |
| rs12155377       | t        | g        | 0.87        | -0.005        | 0.050        | 9.28E-01        | +        |
| rs1486165        | t        | c        | 0.14        | -0.005        | 0.058        | 9.28E-01        | -        |
| rs856549         | t        | c        | 0.26        | 0.003         | 0.039        | 9.31E-01        | +        |
| rs6979582        | t        | c        | 0.13        | 0.004         | 0.050        | 9.38E-01        | -        |
| rs10235181       | a        | t        | 0.05        | -0.007        | 0.105        | 9.44E-01        | -        |
| rs17581179       | t        | g        | 0.91        | 0.004         | 0.059        | 9.49E-01        | +        |
| rs17581193       | a        | c        | 0.91        | 0.004         | 0.059        | 9.50E-01        | +        |
| rs2437732        | t        | g        | 0.58        | 0.002         | 0.036        | 9.50E-01        | +        |
| rs4689665        | t        | c        | 0.17        | -0.002        | 0.046        | 9.60E-01        | -        |
| rs856575         | a        | t        | 0.50        | 0.002         | 0.040        | 9.63E-01        | -        |
| rs17580738       | t        | c        | 0.92        | 0.003         | 0.061        | 9.65E-01        | +        |

|            |   |   |      |        |       |          |   |
|------------|---|---|------|--------|-------|----------|---|
| rs10951832 | a | t | 0.20 | -0.002 | 0.046 | 9.67E-01 | - |
| rs9931988  | c | g | 0.06 | -0.003 | 0.078 | 9.69E-01 | + |
| rs3813761  | t | c | 0.94 | 0.003  | 0.078 | 9.70E-01 | - |
| rs6968126  | a | g | 0.13 | 0.002  | 0.050 | 9.70E-01 | - |
| rs13246409 | a | g | 0.87 | 0.002  | 0.051 | 9.71E-01 | + |
| rs6955080  | t | c | 0.13 | 0.002  | 0.050 | 9.74E-01 | - |
| rs10228324 | t | c | 0.87 | -0.002 | 0.050 | 9.75E-01 | + |
| rs856541   | t | c | 0.25 | -0.001 | 0.039 | 9.76E-01 | + |
| rs1385944  | a | t | 0.08 | -0.002 | 0.061 | 9.77E-01 | - |
| rs2745189  | t | c | 0.14 | -0.001 | 0.051 | 9.81E-01 | - |
| rs866488   | t | c | 0.75 | 0.001  | 0.039 | 9.81E-01 | - |
| rs856548   | a | g | 0.75 | 0.001  | 0.039 | 9.85E-01 | - |
| rs17502849 | t | c | 0.92 | -0.001 | 0.061 | 9.87E-01 | + |
| rs1385943  | a | g | 0.08 | -0.001 | 0.061 | 9.87E-01 | - |
| rs17502828 | a | g | 0.92 | 0.001  | 0.061 | 9.91E-01 | + |
| rs2568696  | t | g | 0.25 | 0.000  | 0.039 | 9.94E-01 | + |
| rs17503015 | t | g | 0.08 | 0.000  | 0.061 | 9.97E-01 | - |
| rs17502974 | a | c | 0.08 | 0.000  | 0.061 | 9.98E-01 | - |
| rs17502891 | a | c | 0.08 | 0.000  | 0.061 | 9.99E-01 | - |
| rs17502946 | a | c | 0.08 | 0.000  | 0.061 | 9.99E-01 | - |
| rs856554   | t | c | 0.75 | 0.000  | 0.039 | 1.00E+00 | - |
| rs17581039 | t | c | 0.92 | 0.000  | 0.061 | 1.00E+00 | + |

"-": effect allele associated with lower IGFBP-3 levels.

"+": effect allele associated with higher IGFBP-3 levels.

Results for 13 independent SNPs defined based on LD (settings  $r^2 > 0.01$ , 1 Mb distance) are indicated by bold text.

**Supplementary Table 12: Enrichment of putative regulatory elements among IGF-1 and IGFBP-3 associated loci**

| SNP        | Proximity to IGF1 or IGFBP3 | Region     | Gene          | Enhancer histone marks (ENCODE) | Enhancer histone marks (RODEMAP) | Promoter histone marks (ROADMAP) | DNase Hypersensitivity | TF Motif (Prediction)               | TF ChIP                  | Regulome Score |
|------------|-----------------------------|------------|---------------|---------------------------------|----------------------------------|----------------------------------|------------------------|-------------------------------------|--------------------------|----------------|
| rs978458   | cis                         | Intronic   | IGF1          | no data                         | 8 cell types                     | SK.MUS                           | 7 cell types           | GR, Gm397                           | NFkB                     | 1b             |
| rs700753   | cis                         | Intergenic | TNS3 / IGFBP3 | NHLF, Huvec                     | 10 cell types                    | LIV.A                            | 25 cell types          | Gfi1 ,Hsf, Nkx2                     | no data                  | 2b             |
| rs11977526 | cis                         | Intergenic | IGFBP3        | no data                         | no data                          | no data                          | no data                | AP2, ELF1, Ets, NRSF, Zic4          | no data                  | no score       |
| rs646776   | trans                       | Intergenic | CELSR2        | 6 cell types                    | 46 cell types                    | 4 cell types                     | 6 cell types           | NRSF, PU.1, TR4                     | CTCF, POLR2A, REST, TAF7 | 1f             |
| rs4234798  | trans                       | Intronic   | SORCS2        | HSMM                            | 14 cell types                    | no data                          | 30 cell types          | no data                             | CEBPB                    | 4              |
| rs2153960  | trans                       | Intronic   | FOXO3         | GM12878, H1                     | 27 cell types                    | IPS.20                           | 4 cell types           | GCNF, Mef2, Pax-4, RXRA             | RXRA, KAP1               | 4              |
| rs780093   | trans                       | Intronic   | GCKR          | no data                         | LIV.A                            | no data                          | GM12892, Adult_CD4_Th0 | INSM1                               | no data                  | 5              |
| rs934073   | trans                       | Intergenic | ASXL2         | no data                         | no data                          | no data                          | ProgFib                | TFII-I, ZEB1                        | no data                  | 5              |
| rs1065656  | trans                       | 3'-UTR     | NUBP2         | HMEC, NHEK                      | 8 cell types                     | no data                          | 4 cell types           | AP-4, BHLHE40, Foxa, GR, PTF1, p300 | no data                  | 5              |
| rs509035   | trans                       | Intronic   | GHSR          | no data                         | no data                          | PANC.I                           | T-47D                  | Crx, Hoxb13, NFkB                   | no data                  | 5              |

## References

- Broer L, Buchman AS, Deelen J, Evans DS, Faul JD, Lunetta KL, Sebastiani P, Smith JA, Smith AV, Tanaka T, Yu L, Arnold AM, Aspelund T, Benjamin EJ, De Jager PL, Eiriksdottir G, Evans DA, Garcia ME, Hofman A, Kaplan RC, Kardia SL, Kiel DP, Oostra BA, Orwoll ES, Parimi N, Psaty BM, Rivadeneira F, Rotter JI, Seshadri S, Singleton A, Tiemeier H, Uitterlinden AG, Zhao W, Bandinelli S, Bennett DA, Ferrucci L, Gudnason V, Harris TB, Karasik D, Launer LJ, Perls TT, Slagboom PE, Tranah GJ, Weir DR, Newman AB, van Duijn CM, Murabito JM (2014). GWAS of Longevity in CHARGE Consortium Confirms APOE and FOXO3 Candidacy. *The journals of gerontology. Series A, Biological sciences and medical sciences*.
- Consortium CAD, Deloukas P, Kanoni S, Willenborg C, Farrall M, Assimes TL, Thompson JR, Ingelsson E, Saleheen D, Erdmann J, Goldstein BA, Stirrups K, Konig IR, Cazier JB, Johansson A, Hall AS, Lee JY, Willer CJ, Chambers JC, Esko T, Folkersen L, Goel A, Grundberg E, Havulinna AS, Ho WK, Hopewell JC, Eriksson N, Kleber ME, Kristiansson K, Lundmark P, Lyytikainen LP, Rafelt S, Shungin D, Strawbridge RJ, Thorleifsson G, Tikkanen E, Van Zuydam N, Voight BF, Waite LL, Zhang W, Ziegler A, Absher D, Altshuler D, Balmforth AJ, Barroso I, Braund PS, Burgdorf C, Claudi-Boehm S, Cox D, Dimitriou M, Do R, Consortium D, Consortium C, Doney AS, El Mokhtari N, Eriksson P, Fischer K, Fontanillas P, Franco-Cereceda A, Gigante B, Groop L, Gustafsson S, Hager J, Hallmans G, Han BG, Hunt SE, Kang HM, Illig T, Kessler T, Knowles JW, Kolovou G, Kuusisto J, Langenberg C, Langford C, Leander K, Lokki ML, Lundmark A, McCarthy MI, Meisinger C, Melander O, Mihailov E, Maouche S, Morris AD, Muller-Nurasyid M, Mu TC, Nikus K, Peden JF, Rayner NW, Rasheed A, Rosinger S, Rubin D, Rumpf MP, Schafer A, Sivananthan M, Song C, Stewart AF, Tan ST, Thorgeirsson G, van der Schoot CE, Wagner PJ, Wellcome Trust Case Control C, Wells GA, Wild PS, Yang TP, Amouyel P, Arveiler D, Basart H, Boehnke M, Boerwinkle E, Brambilla P, Cambien F, Cupples AL, de Faire U, Dehghan A, Diemert P, Epstein SE, Evans A, Ferrario MM, Ferrieres J, Gauguier D, Go AS, Goodall AH, Gudnason V, Hazen SL, Holm H, Iribarren C, Jang Y, Kahonen M, Kee F, Kim HS, Klopp N, Koenig W, Kratzer W, Kuulasmaa K, Laakso M, Laaksonen R, Lee JY, Lind L, Ouwehand WH, Parish S, Park JE, Pedersen NL, Peters A, Quertermous T, Rader DJ, Salomaa V, Schadt E, Shah SH, Sinisalo J, Stark K, Stefansson K, Tregouet DA, Virtamo J, Wallentin L, Wareham N, Zimmermann ME, Nieminen MS, Hengstenberg C, Sandhu MS, Pastinen T, Syvanen AC, Hovingh GK, Dedoussis G, Franks PW, Lehtimäki T, Metspalu A, Zalloua PA, Siegbahn A, Schreiber S, Ripatti S, Blankenberg SS, Perola M, Clarke R, Boehm BO, O'Donnell C, Reilly MP, Marz W, Collins R, Kathiresan S, Hamsten A, Kooner JS, Thorsteinsdottir U, Danesh J, Palmer CN, Roberts R, Watkins H, Schunkert H, Samani NJ (2013). Large-scale association analysis identifies new risk loci for coronary artery disease. *Nature genetics*. **45**, 25-33.
- Coronary Artery Disease Genetics C (2011). A genome-wide association study in Europeans and South Asians identifies five new loci for coronary artery disease. *Nature genetics*. **43**, 339-344.
- Dupuis J, Langenberg C, Prokopenko I, Saxena R, Soranzo N, Jackson AU, Wheeler E, Glazer NL, Bouatia-Naji N, Gloyn AL, Lindgren CM, Magi R, Morris AP, Randall J, Johnson T, Elliott P, Rybin D, Thorleifsson G, Steinthorsdottir V, Henneman P, Grallert H, Dehghan A, Hottenga JJ, Franklin CS, Navarro P, Song K, Goel A, Perry JR, Egan JM, Lajunen T, Grarup N, Sparso T, Doney A, Voight BF, Stringham HM, Li M, Kanoni S, Shrader P, Cavalcanti-Proença C, Kumari M, Qi L, Timpson NJ, Gieger C, Zabena C, Rocheleau G, Ingelsson E, An P, O'Connell J, Luan J, Elliott A, McCarroll SA, Payne F, Roccascella RM, Pattou F, Sethupathy P, Ardlie K, Ariyurek Y, Balkau B, Barter P, Beilby JP, Ben-Shlomo Y, Benediktsson R, Bennett AJ, Bergmann S, Bochud M, Boerwinkle E, Bonnefond A, Bonnycastle LL, Borch-Johnsen K, Bottcher Y, Brunner E, Bumpstead SJ, Charpentier G, Chen YD, Chines P, Clarke R, Coin LJ, Cooper MN, Cornelis M, Crawford G, Crisponi L, Day IN, de Geus EJ, Delplanque J, Dina C, Erdos MR, Fedson AC, Fischer-Rosinsky A, Forouhi NG, Fox CS, Frants R,

Franzosi MG, Galan P, Goodarzi MO, Graessler J, Groves CJ, Grundy S, Gwilliam R, Gyllensten U, Hadjadj S, Hallmans G, Hammond N, Han X, Hartikainen AL, Hassanali N, Hayward C, Heath SC, Hercberg S, Herder C, Hicks AA, Hillman DR, Hingorani AD, Hofman A, Hui J, Hung J, Isomaa B, Johnson PR, Jorgensen T, Jula A, Kaakinen M, Kaprio J, Kesaniemi YA, Kivimaki M, Knight B, Koskinen S, Kovacs P, Kyvik KO, Lathrop GM, Lawlor DA, Le Bacquer O, Lecoeur C, Li Y, Lyssenko V, Mahley R, Mangino M, Manning AK, Martinez-Larrad MT, McAteer JB, McCulloch LJ, McPherson R, Meisinger C, Melzer D, Meyre D, Mitchell BD, Morken MA, Mukherjee S, Naitza S, Narisu N, Neville MJ, Oostra BA, Orru M, Pakyz R, Palmer CN, Paolisso G, Pattaro C, Pearson D, Peden JF, Pedersen NL, Perola M, Pfeiffer AF, Pichler I, Polasek O, Posthuma D, Potter SC, Pouta A, Province MA, Psaty BM, Rathmann W, Rayner NW, Rice K, Ripatti S, Rivadeneira F, Roden M, Rolandsson O, Sandbaek A, Sandhu M, Sanna S, Sayer AA, Scheet P, Scott LJ, Seedorf U, Sharp SJ, Shields B, Sigurethsson G, Sijbrands EJ, Silveira A, Simpson L, Singleton A, Smith NL, Sovio U, Swift A, Syddall H, Syvanen AC, Tanaka T, Thorand B, Tichet J, Tonjes A, Tuomi T, Uitterlinden AG, van Dijk KW, van Hoek M, Varma D, Visvikis-Siest S, Vitart V, Vogelzangs N, Waeber G, Wagner PJ, Walley A, Walters GB, Ward KL, Watkins H, Weedon MN, Wild SH, Willemsen G, Witteman JC, Yarnell JW, Zeggini E, Zelenika D, Zethelius B, Zhai G, Zhao JH, Zillikens MC, Consortium D, Consortium G, Global BC, Borecki IB, Loos RJ, Meneton P, Magnusson PK, Nathan DM, Williams GH, Hattersley AT, Silander K, Salomaa V, Smith GD, Bornstein SR, Schwarz P, Spranger J, Karpe F, Shuldiner AR, Cooper C, Dedoussis GV, Serrano-Rios M, Morris AD, Lind L, Palmer LJ, Hu FB, Franks PW, Ebrahim S, Marmot M, Kao WH, Pankow JS, Sampson MJ, Kuusisto J, Laakso M, Hansen T, Pedersen O, Pramstaller PP, Wichmann HE, Illig T, Rudan I, Wright AF, Stumvoll M, Campbell H, Wilson JF, Anders Hamsten on behalf of Procardis C, investigators M, Bergman RN, Buchanan TA, Collins FS, Mohlke KL, Tuomilehto J, Valle TT, Altshuler D, Rotter JI, Siscovick DS, Penninx BW, Boomsma DI, Deloukas P, Spector TD, Frayling TM, Ferrucci L, Kong A, Thorsteinsdottir U, Stefansson K, van Duijn CM, Aulchenko YS, Cao A, Scuteri A, Schlessinger D, Uda M, Ruokonen A, Jarvelin MR, Waterworth DM, Vollenweider P, Peltonen L, Mooser V, Abecasis GR, Wareham NJ, Sladek R, Froguel P, Watanabe RM, Meigs JB, Groop L, Boehnke M, McCarthy MI, Florez JC, Barroso I (2010). New genetic loci implicated in fasting glucose homeostasis and their impact on type 2 diabetes risk. *Nature genetics*. **42**, 105-116.

Estrada K, Styrkarsdottir U, Evangelou E, Hsu YH, Duncan EL, Ntzani EE, Oei L, Albagha OM, Amin N, Kemp JP, Koller DL, Li G, Liu CT, Minster RL, Moayyeri A, Vandenput L, Willner D, Xiao SM, Yerges-Armstrong LM, Zheng HF, Alonso N, Eriksson J, Kammerer CM, Kaptoge SK, Leo PJ, Thorleifsson G, Wilson SG, Wilson JF, Aalto V, Alen M, Aragaki AK, Aspelund T, Center JR, Dailiana Z, Duggan DJ, Garcia M, Garcia-Giralt N, Giroux S, Hallmans G, Hocking LJ, Husted LB, Jameson KA, Khusainova R, Kim GS, Kooperberg C, Koromila T, Kruk M, Laaksonen M, Lacroix AZ, Lee SH, Leung PC, Lewis JR, Masi L, Mencej-Bedrac S, Nguyen TV, Nogues X, Patel MS, Prezelj J, Rose LM, Scollen S, Siggeirsdottir K, Smith AV, Svensson O, Trompet S, Trummer O, van Schoor NM, Woo J, Zhu K, Balcells S, Brandi ML, Buckley BM, Cheng S, Christiansen C, Cooper C, Dedoussis G, Ford I, Frost M, Goltzman D, Gonzalez-Macias J, Kahonen M, Karlsson M, Khusnutdinova E, Koh JM, Kollia P, Langdahl BL, Leslie WD, Lips P, Ljunggren O, Lorenc RS, Marc J, Mellstrom D, Obermayer-Pietsch B, Olmos JM, Pettersson-Kymmer U, Reid DM, Riancho JA, Ridker PM, Rousseau F, Slagboom PE, Tang NL, Urreiziti R, Van Hul W, Viikari J, Zarrabeitia MT, Aulchenko YS, Castano-Betancourt M, Grundberg E, Herrera L, Ingvarsson T, Johannsdottir H, Kwan T, Li R, Luben R, Medina-Gomez C, Palsson ST, Reppe S, Rotter JI, Sigurdsson G, van Meurs JB, Verlaan D, Williams FM, Wood AR, Zhou Y, Gautvik KM, Pastinen T, Raychaudhuri S, Cauley JA, Chasman DI, Clark GR, Cummings SR, Danoy P, Dennison EM, Eastell R, Eisman JA, Gudnason V, Hofman A, Jackson RD, Jones G, Jukema JW, Khaw KT, Lehtimaki T, Liu Y, Lorentzon M, McCloskey E, Mitchell BD, Nandakumar K, Nicholson GC, Oostra BA, Peacock M, Pols HA, Prince RL, Raitakari O, Reid IR, Robbins J, Sambrook PN, Sham PC, Shuldiner AR, Tyllavsky FA, van Duijn CM, Wareham NJ,



- Cupples LA, Econs MJ, Evans DM, Harris TB, Kung AW, Psaty BM, Reeve J, Spector TD, Streeten EA, Zillikens MC, Thorsteinsdottir U, Ohlsson C, Karasik D, Richards JB, Brown MA, Stefansson K, Uitterlinden AG, Ralston SH, Ioannidis JP, Kiel DP, Rivadeneira F (2012). Genome-wide meta-analysis identifies 56 bone mineral density loci and reveals 14 loci associated with risk of fracture. *Nature genetics*. **44**, 491-501.
- Fuchsberger C, Taliun D, Pramstaller PP, Pattaro C, consortium CK (2012). GWAToolbox: an R package for fast quality control and handling of genome-wide association studies meta-analysis data. *Bioinformatics*. **28**, 444-445.
- Grundberg E, Small KS, Hedman AK, Nica AC, Buil A, Keildson S, Bell JT, Yang TP, Meduri E, Barrett A, Nisbett J, Sekowska M, Wilk A, Shin SY, Glass D, Travers M, Min JL, Ring S, Ho K, Thorleifsson G, Kong A, Thorsteindottir U, Ainali C, Dimas AS, Hassanali N, Ingle C, Knowles D, Krestyaninova M, Lowe CE, Di Meglio P, Montgomery SB, Parts L, Potter S, Surdulescu G, Tsaprouni L, Tsoka S, Bataille V, Durbin R, Nestle FO, O'Rahilly S, Soranzo N, Lindgren CM, Zondervan KT, Ahmadi KR, Schadt EE, Stefansson K, Smith GD, McCarthy MI, Deloukas P, Dermitzakis ET, Spector TD, Multiple Tissue Human Expression Resource C (2012). Mapping cis- and trans-regulatory effects across multiple tissues in twins. *Nature genetics*. **44**, 1084-1089.
- Heid IM, Jackson AU, Randall JC, Winkler TW, Qi L, Steinthorsdottir V, Thorleifsson G, Zillikens MC, Speliotes EK, Magi R, Workalemahu T, White CC, Bouatia-Naji N, Harris TB, Berndt SI, Ingelsson E, Willer CJ, Weedon MN, Luan J, Vedantam S, Esko T, Kilpelainen TO, Kutalik Z, Li S, Monda KL, Dixon AL, Holmes CC, Kaplan LM, Liang L, Min JL, Moffatt MF, Molony C, Nicholson G, Schadt EE, Zondervan KT, Feitosa MF, Ferreira T, Lango Allen H, Weyant RJ, Wheeler E, Wood AR, Magic, Estrada K, Goddard ME, Lettre G, Mangino M, Nyholt DR, Purcell S, Smith AV, Visscher PM, Yang J, McCarroll SA, Nemes J, Voight BF, Absher D, Amin N, Aspelund T, Coin L, Glazer NL, Hayward C, Heard-Costa NL, Hottenga JJ, Johansson A, Johnson T, Kaakinen M, Kapur K, Ketkar S, Knowles JW, Kraft P, Kraja AT, Lamina C, Leitzmann MF, McKnight B, Morris AP, Ong KK, Perry JR, Peters MJ, Polasek O, Prokopenko I, Rayner NW, Ripatti S, Rivadeneira F, Robertson NR, Sanna S, Sovio U, Surakka I, Teumer A, van Wingerden S, Vitart V, Zhao JH, Cavalcanti-Proenca C, Chines PS, Fisher E, Kulzer JR, Lecoeur C, Narisu N, Sandholt C, Scott LJ, Silander K, Stark K, Tammesoo ML, Teslovich TM, Timpson NJ, Watanabe RM, Welch R, Chasman DI, Cooper MN, Jansson JO, Kettunen J, Lawrence RW, Pellikka N, Perola M, Vandenput L, Alavere H, Almgren P, Atwood LD, Bennett AJ, Biffar R, Bonnycastle LL, Bornstein SR, Buchanan TA, Campbell H, Day IN, Dei M, Dorr M, Elliott P, Erdos MR, Eriksson JG, Freimer NB, Fu M, Gaget S, Geus EJ, Gjesing AP, Grallert H, Grasser J, Groves CJ, Guiducci C, Hartikainen AL, Hassanali N, Havulinna AS, Herzig KH, Hicks AA, Hui J, Igl W, Jousilahti P, Jula A, Kajantie E, Kinnunen L, Kolcic I, Koskinen S, Kovacs P, Kroemer HK, Krzlj V, Kuusisto J, Kvaloy K, Laitinen J, Lantieri O, Lathrop GM, Lokki ML, Luben RN, Ludwig B, McArdle WL, McCarthy A, Morken MA, Nelis M, Neville MJ, Pare G, Parker AN, Peden JF, Pichler I, Pietilainen KH, Platou CG, Pouta A, Ridderstrale M, Samani NJ, Saramies J, Sinisalo J, Smit JH, Strawbridge RJ, Stringham HM, Swift AJ, Teder-Laving M, Thomson B, Usala G, van Meurs JB, van Ommen GJ, Vatin V, Volpato CB, Wallaschofski H, Walters GB, Widen E, Wild SH, Willemssen G, Witte DR, Zgaga L, Zitting P, Beilby JP, James AL, Kahonen M, Lehtimäki T, Nieminen MS, Ohlsson C, Palmer LJ, Raitakari O, Ridker PM, Stumvoll M, Tonjes A, Viikari J, Balkau B, Ben-Shlomo Y, Bergman RN, Boeing H, Smith GD, Ebrahim S, Froguel P, Hansen T, Hengstenberg C, Hveem K, Isomaa B, Jorgensen T, Karpe F, Khaw KT, Laakso M, Lawlor DA, Marre M, Meitinger T, Metspalu A, Midthjell K, Pedersen O, Salomaa V, Schwarz PE, Tuomi T, Tuomilehto J, Valle TT, Wareham NJ, Arnold AM, Beckmann JS, Bergmann S, Boerwinkle E, Boomsma DI, Caulfield MJ, Collins FS, Eiriksdottir G, Gudnason V, Gyllensten U, Hamsten A, Hattersley AT, Hofman A, Hu FB, Illig T, Iribarren C, Jarvelin MR, Kao WH, Kaprio J, Launer LJ, Munroe PB, Oostra B, Penninx BW, Pramstaller PP, Psaty BM, Quertermous T, Rissanen A, Rudan I, Shuldiner AR, Soranzo N, Spector TD, Syvanen AC, Uda M, Uitterlinden A, Volzke H,

- Vollenweider P, Wilson JF, Witteman JC, Wright AF, Abecasis GR, Boehnke M, Borecki IB, Deloukas P, Frayling TM, Groop LC, Haritunians T, Hunter DJ, Kaplan RC, North KE, O'Connell JR, Peltonen L, Schlessinger D, Strachan DP, Hirschhorn JN, Assimes TL, Wichmann HE, Thorsteinsdottir U, van Duijn CM, Stefansson K, Cupples LA, Loos RJ, Barroso I, McCarthy MI, Fox CS, Mohlke KL, Lindgren CM (2010). Meta-analysis identifies 13 new loci associated with waist-hip ratio and reveals sexual dimorphism in the genetic basis of fat distribution. *Nature genetics*. **42**, 949-960.
- Lango Allen H, Estrada K, Lettre G, Berndt SI, Weedon MN, Rivadeneira F, Willer CJ, Jackson AU, Vedantam S, Raychaudhuri S, Ferreira T, Wood AR, Weyant RJ, Segre AV, Speliotes EK, Wheeler E, Soranzo N, Park JH, Yang J, Gudbjartsson D, Heard-Costa NL, Randall JC, Qi L, Vernon Smith A, Magi R, Pastinen T, Liang L, Heid IM, Luan J, Thorleifsson G, Winkler TW, Goddard ME, Sin Lo K, Palmer C, Workalemahu T, Aulchenko YS, Johansson A, Zillikens MC, Feitosa MF, Esko T, Johnson T, Ketkar S, Kraft P, Mangino M, Prokopenko I, Absher D, Albrecht E, Ernst F, Glazer NL, Hayward C, Hottenga JJ, Jacobs KB, Knowles JW, Kutalik Z, Monda KL, Polasek O, Preuss M, Rayner NW, Robertson NR, Steinthorsdottir V, Tyrer JP, Voight BF, Wiklund F, Xu J, Zhao JH, Nyholt DR, Pellikka N, Perola M, Perry JR, Surakka I, Tammesoo ML, Altmaier EL, Amin N, Aspelund T, Bhangale T, Boucher G, Chasman DI, Chen C, Coin L, Cooper MN, Dixon AL, Gibson Q, Grundberg E, Hao K, Juhani Juntila M, Kaplan LM, Kettunen J, König IR, Kwan T, Lawrence RW, Levinson DF, Lorentzon M, McKnight B, Morris AP, Müller M, Suh Ngwa J, Purcell S, Rafelt S, Salem RM, Salvi E, Sanna S, Shi J, Sovio U, Thompson JR, Turchin MC, Vandenput L, Verlaan DJ, Vitart V, White CC, Ziegler A, Almgren P, Balmforth AJ, Campbell H, Citterio L, De Grandi A, Dominiczak A, Duan J, Elliott P, Elosua R, Eriksson JG, Freimer NB, Geus EJ, Glorioso N, Haiqing S, Hartikainen AL, Havulinna AS, Hicks AA, Hui J, Igl W, Illig T, Jula A, Kajantie E, Kilpelainen TO, Koiranen M, Kolcic I, Koskinen S, Kovacs P, Laitinen J, Liu J, Lokki ML, Marusic A, Maschio A, Meitinger T, Mulas A, Pare G, Parker AN, Peden JF, Petersmann A, Pichler I, Pietilainen KH, Pouta A, Ridderstrale M, Rotter JI, Sambrook JG, Sanders AR, Schmidt CO, Sinisalo J, Smit JH, Stringham HM, Bragi Walters G, Widen E, Wild SH, Willemsen G, Zagato L, Zgaga L, Zitting P, Alavere H, Farrall M, McArdle WL, Nelis M, Peters MJ, Ripatti S, van Meurs JB, Aben KK, Ardlie KG, Beckmann JS, Beilby JP, Bergman RN, Bergmann S, Collins FS, Cusi D, den Heijer M, Eiriksdottir G, Gejman PV, Hall AS, Hamsten A, Huikuri HV, Iribarren C, Kahonen M, Kaprio J, Kathiresan S, Kiemeny L, Kocher T, Launer LJ, Lehtimäki T, Melander O, Mosley TH, Jr., Musk AW, Nieminen MS, O'Donnell CJ, Ohlsson C, Oostra B, Palmer LJ, Raitakari O, Ridker PM, Rioux JD, Rissanen A, Rivolta C, Schunkert H, Shuldiner AR, Siscovick DS, Stumvoll M, Tonjes A, Tuomilehto J, van Ommen GJ, Viikari J, Heath AC, Martin NG, Montgomery GW, Province MA, Kayser M, Arnold AM, Atwood LD, Boerwinkle E, Chanock SJ, Deloukas P, Gieger C, Gronberg H, Hall P, Hattersley AT, Hengstenberg C, Hoffman W, Lathrop GM, Salomaa V, Schreiber S, Uda M, Waterworth D, Wright AF, Assimes TL, Barroso I, Hofman A, Mohlke KL, Boomsma DI, Caulfield MJ, Cupples LA, Erdmann J, Fox CS, Gudnason V, Gyllenstein U, Harris TB, Hayes RB, Jarvelin MR, Mooser V, Munroe PB, Ouwehand WH, Penninx BW, Pramstaller PP, Quertermous T, Rudan I, Samani NJ, Spector TD, Volzke H, Watkins H, Wilson JF, Groop LC, Haritunians T, Hu FB, Kaplan RC, Metspalu A, North KE, Schlessinger D, Wareham NJ, Hunter DJ, O'Connell JR, Strachan DP, Wichmann HE, Borecki IB, van Duijn CM, Schadt EE, Thorsteinsdottir U, Peltonen L, Uitterlinden AG, Visscher PM, Chatterjee N, Loos RJ, Boehnke M, McCarthy MI, Ingelsson E, Lindgren CM, Abecasis GR, Stefansson K, Frayling TM, Hirschhorn JN (2010). Hundreds of variants clustered in genomic loci and biological pathways affect human height. *Nature*. **467**, 832-838.
- Morris AP, Voight BF, Teslovich TM, Ferreira T, Segre AV, Steinthorsdottir V, Strawbridge RJ, Khan H, Grallert H, Mahajan A, Prokopenko I, Kang HM, Dina C, Esko T, Fraser RM, Kanoni S, Kumar A, Lagou V, Langenberg C, Luan J, Lindgren CM, Müller-Nurasyid M, Pechlivanis S, Rayner NW, Scott LJ, Wiltshire S, Yengo L, Kinnunen L, Rossin EJ, Raychaudhuri S, Johnson AD, Dimas AS, Loos RJ,

Vedantam S, Chen H, Florez JC, Fox C, Liu CT, Rybin D, Couper DJ, Kao WH, Li M, Cornelis MC, Kraft P, Sun Q, van Dam RM, Stringham HM, Chines PS, Fischer K, Fontanillas P, Holmen OL, Hunt SE, Jackson AU, Kong A, Lawrence R, Meyer J, Perry JR, Platou CG, Potter S, Rehnberg E, Robertson N, Sivapalaratnam S, Stancakova A, Stirrups K, Thorleifsson G, Tikkanen E, Wood AR, Almgren P, Atalay M, Benediktsson R, Bonnycastle LL, Burt N, Carey J, Charpentier G, Crenshaw AT, Doney AS, Dorkhan M, Edkins S, Emilsson V, Eury E, Forsen T, Gertow K, Gigante B, Grant GB, Groves CJ, Guiducci C, Herder C, Hreidarsson AB, Hui J, James A, Jonsson A, Rathmann W, Klopp N, Kravic J, Krjutskov K, Langford C, Leander K, Lindholm E, Lobbens S, Mannisto S, Mirza G, Muhleisen TW, Musk B, Parkin M, Rallidis L, Saramies J, Sennblad B, Shah S, Sigurethsson G, Silveira A, Steinbach G, Thorand B, Trakalo J, Veglia F, Wennauer R, Winckler W, Zabaneh D, Campbell H, van Duijn C, Uitterlinden AG, Hofman A, Sijbrands E, Abecasis GR, Owen KR, Zeggini E, Trip MD, Forouhi NG, Syvanen AC, Eriksson JG, Peltonen L, Nothen MM, Balkau B, Palmer CN, Lyssenko V, Tuomi T, Isomaa B, Hunter DJ, Qi L, Wellcome Trust Case Control C, Meta-Analyses of G, Insulin-related traits Consortium I, Genetic Investigation of ATC, Asian Genetic Epidemiology Network-Type 2 Diabetes C, South Asian Type 2 Diabetes C, Shuldiner AR, Roden M, Barroso I, Wilsgaard T, Beilby J, Hovingh K, Price JF, Wilson JF, Rauramaa R, Lakka TA, Lind L, Dedoussis G, Njolstad I, Pedersen NL, Khaw KT, Wareham NJ, Keinanen-Kiukaanniemi SM, Saaristo TE, Korpi-Hyovalti E, Saltevo J, Laakso M, Kuusisto J, Metspalu A, Collins FS, Mohlke KL, Bergman RN, Tuomilehto J, Boehm BO, Gieger C, Hveem K, Cauchi S, Froguel P, Baldassarre D, Tremoli E, Humphries SE, Saleheen D, Danesh J, Ingelsson E, Ripatti S, Salomaa V, Erbel R, Jockel KH, Moebus S, Peters A, Illig T, de Faire U, Hamsten A, Morris AD, Donnelly PJ, Frayling TM, Hattersley AT, Boerwinkle E, Melander O, Kathiresan S, Nilsson PM, Deloukas P, Thorsteinsdottir U, Groop LC, Stefansson K, Hu F, Pankow JS, Dupuis J, Meigs JB, Altshuler D, Boehnke M, McCarthy MI, Replication DIG, Meta-analysis C (2012). Large-scale association analysis provides insights into the genetic architecture and pathophysiology of type 2 diabetes. *Nature genetics*. **44**, 981-990.

Saxena R, Hivert MF, Langenberg C, Tanaka T, Pankow JS, Vollenweider P, Lyssenko V, Bouatia-Naji N, Dupuis J, Jackson AU, Kao WH, Li M, Glazer NL, Manning AK, Luan J, Stringham HM, Prokopenko I, Johnson T, Grarup N, Boesgaard TW, Lecoeur C, Shrader P, O'Connell J, Ingelsson E, Couper DJ, Rice K, Song K, Andreasen CH, Dina C, Kottgen A, Le Bacquer O, Pattou F, Taneera J, Steinthorsdottir V, Rybin D, Ardlie K, Sampson M, Qi L, van Hoek M, Weedon MN, Aulchenko YS, Voight BF, Grallert H, Balkau B, Bergman RN, Bielinski SJ, Bonnefond A, Bonnycastle LL, Borch-Johnsen K, Bottcher Y, Brunner E, Buchanan TA, Bumpstead SJ, Cavalcanti-Proenca C, Charpentier G, Chen YD, Chines PS, Collins FS, Cornelis M, G JC, Delplanque J, Doney A, Egan JM, Erdos MR, Firmann M, Forouhi NG, Fox CS, Goodarzi MO, Graessler J, Hingorani A, Isomaa B, Jorgensen T, Kivimaki M, Kovacs P, Krohn K, Kumari M, Lauritzen T, Levy-Marchal C, Mayor V, McAteer JB, Meyre D, Mitchell BD, Mohlke KL, Morken MA, Narisu N, Palmer CN, Pakyz R, Pascoe L, Payne F, Pearson D, Rathmann W, Sandbaek A, Sayer AA, Scott LJ, Sharp SJ, Sijbrands E, Singleton A, Siscovick DS, Smith NL, Sparso T, Swift AJ, Syddall H, Thorleifsson G, Tonjes A, Tuomi T, Tuomilehto J, Valle TT, Waeber G, Walley A, Waterworth DM, Zeggini E, Zhao JH, consortium G, investigators M, Illig T, Wichmann HE, Wilson JF, van Duijn C, Hu FB, Morris AD, Frayling TM, Hattersley AT, Thorsteinsdottir U, Stefansson K, Nilsson P, Syvanen AC, Shuldiner AR, Walker M, Bornstein SR, Schwarz P, Williams GH, Nathan DM, Kuusisto J, Laakso M, Cooper C, Marmot M, Ferrucci L, Mooser V, Stumvoll M, Loos RJ, Altshuler D, Psaty BM, Rotter JI, Boerwinkle E, Hansen T, Pedersen O, Florez JC, McCarthy MI, Boehnke M, Barroso I, Sladek R, Froguel P, Meigs JB, Groop L, Wareham NJ, Watanabe RM (2010). Genetic variation in GIPR influences the glucose and insulin responses to an oral glucose challenge. *Nature genetics*. **42**, 142-148.

Schunkert H, Konig IR, Kathiresan S, Reilly MP, Assimes TL, Holm H, Preuss M, Stewart AF, Barbalic M, Gieger C, Absher D, Aherrahrou Z, Allayee H, Altshuler D, Anand SS, Andersen K, Anderson JL,

- Ardissino D, Ball SG, Balmforth AJ, Barnes TA, Becker DM, Becker LC, Berger K, Bis JC, Boekholdt SM, Boerwinkle E, Braund PS, Brown MJ, Burnett MS, Buysschaert I, Cardiogenics, Carlquist JF, Chen L, Cichon S, Codd V, Davies RW, Dedoussis G, Dehghan A, Demissie S, Devaney JM, Diemert P, Do R, Doering A, Eifert S, Mokhtari NE, Ellis SG, Elosua R, Engert JC, Epstein SE, de Faire U, Fischer M, Folsom AR, Freyer J, Gigante B, Girelli D, Gretarsdottir S, Gudnason V, Gulcher JR, Halperin E, Hammond N, Hazen SL, Hofman A, Horne BD, Illig T, Iribarren C, Jones GT, Jukema JW, Kaiser MA, Kaplan LM, Kastelein JJ, Khaw KT, Knowles JW, Kolovou G, Kong A, Laaksonen R, Lambrechts D, Leander K, Lettre G, Li M, Lieb W, Loley C, Lotery AJ, Mannucci PM, Maouche S, Martinelli N, McKeown PP, Meisinger C, Meitinger T, Melander O, Merlini PA, Mooser V, Morgan T, Muhleisen TW, Muhlestein JB, Munzel T, Musunuru K, Nahrstaedt J, Nelson CP, Nothen MM, Olivieri O, Patel RS, Patterson CC, Peters A, Peyvandi F, Qu L, Quyyumi AA, Rader DJ, Rallidis LS, Rice C, Rosendaal FR, Rubin D, Salomaa V, Sampietro ML, Sandhu MS, Schadt E, Schafer A, Schillert A, Schreiber S, Schrezenmeir J, Schwartz SM, Siscovick DS, Sivananthan M, Sivapalaratnam S, Smith A, Smith TB, Snoep JD, Soranzo N, Spertus JA, Stark K, Stirrups K, Stoll M, Tang WH, Tennstedt S, Thorgeirsson G, Thorleifsson G, Tomaszewski M, Uitterlinden AG, van Rij AM, Voight BF, Wareham NJ, Wells GA, Wichmann HE, Wild PS, Willenborg C, Witteman JC, Wright BJ, Ye S, Zeller T, Ziegler A, Cambien F, Goodall AH, Cupples LA, Quertermous T, Marz W, Hengstenberg C, Blankenberg S, Ouwehand WH, Hall AS, Deloukas P, Thompson JR, Stefansson K, Roberts R, Thorsteinsdottir U, O'Donnell CJ, McPherson R, Erdmann J, Consortium CA, Samani NJ (2011). Large-scale association analysis identifies 13 new susceptibility loci for coronary artery disease. *Nature genetics*. **43**, 333-338.
- Schurmann C, Heim K, Schillert A, Blankenberg S, Carstensen M, Dorr M, Endlich K, Felix SB, Gieger C, Grallert H, Herder C, Hoffmann W, Homuth G, Illig T, Kruppa J, Meitinger T, Muller C, Nauck M, Peters A, Rettig R, Roden M, Strauch K, Volker U, Volzke H, Wahl S, Wallaschofski H, Wild PS, Zeller T, Teumer A, Prokisch H, Ziegler A (2012). Analyzing illumina gene expression microarray data from different tissues: methodological aspects of data analysis in the metaxpress consortium. *PLoS one*. **7**, e50938.
- Shin SY, Fauman EB, Petersen AK, Krumsiek J, Santos R, Huang J, Arnold M, Erte I, Forgetta V, Yang TP, Walter K, Menni C, Chen L, Vasquez L, Valdes AM, Hyde CL, Wang V, Ziemek D, Roberts P, Xi L, Grundberg E, Multiple Tissue Human Expression Resource C, Waldenberger M, Richards JB, Mohny RP, Milburn MV, John SL, Trimmer J, Theis FJ, Overington JP, Suhre K, Brosnan MJ, Gieger C, Kastenmuller G, Spector TD, Soranzo N (2014). An atlas of genetic influences on human blood metabolites. *Nature genetics*. **46**, 543-550.
- Soranzo N, Sanna S, Wheeler E, Gieger C, Radke D, Dupuis J, Bouatia-Naji N, Langenberg C, Prokopenko I, Stolerman E, Sandhu MS, Heeney MM, Devaney JM, Reilly MP, Ricketts SL, Stewart AF, Voight BF, Willenborg C, Wright B, Altshuler D, Arking D, Balkau B, Barnes D, Boerwinkle E, Boehm B, Bonnefond A, Bonnycastle LL, Boomsma DI, Bornstein SR, Bottcher Y, Bumpstead S, Burnett-Miller MS, Campbell H, Cao A, Chambers J, Clark R, Collins FS, Coresh J, de Geus EJ, Dei M, Deloukas P, Doring A, Egan JM, Elosua R, Ferrucci L, Forouhi N, Fox CS, Franklin C, Franzosi MG, Gallina S, Goel A, Graessler J, Grallert H, Greinacher A, Hadley D, Hall A, Hamsten A, Hayward C, Heath S, Herder C, Homuth G, Hottenga JJ, Hunter-Merrill R, Illig T, Jackson AU, Jula A, Kleber M, Knouff CW, Kong A, Kooner J, Kottgen A, Kovacs P, Krohn K, Kuhnel B, Kuusisto J, Laakso M, Lathrop M, Lecoeur C, Li M, Li M, Loos RJ, Luan J, Lyssenko V, Magi R, Magnusson PK, Malarstig A, Mangino M, Martinez-Larrad MT, Marz W, McArdle WL, McPherson R, Meisinger C, Meitinger T, Melander O, Mohlke KL, Mooser VE, Morken MA, Narisu N, Nathan DM, Nauck M, O'Donnell C, Oexle K, Olla N, Pankow JS, Payne F, Peden JF, Pedersen NL, Peltonen L, Perola M, Polasek O, Porcu E, Rader DJ, Rathmann W, Ripatti S, Rocheleau G, Roden M, Rudan I, Salomaa V, Saxena R, Schlessinger D, Schunkert H, Schwarz P, Seedorf U, Selvin E, Serrano-Rios M, Shrader P, Silveira A, Siscovick D, Song K, Spector TD, Stefansson K, Steinthorsdottir V, Strachan DP, Strawbridge R,

Stumvoll M, Surakka I, Swift AJ, Tanaka T, Teumer A, Thorleifsson G, Thorsteinsdottir U, Tonjes A, Usala G, Vitart V, Volzke H, Wallaschofski H, Waterworth DM, Watkins H, Wichmann HE, Wild SH, Willemsen G, Williams GH, Wilson JF, Winkelmann J, Wright AF, Wtccc, Zabena C, Zhao JH, Epstein SE, Erdmann J, Hakonarson HH, Kathiresan S, Khaw KT, Roberts R, Samani NJ, Fleming MD, Sladek R, Abecasis G, Boehnke M, Froguel P, Groop L, McCarthy MI, Kao WH, Florez JC, Uda M, Wareham NJ, Barroso I, Meigs JB (2010). Common variants at 10 genomic loci influence hemoglobin A(1)(C) levels via glyceimic and nonglyceimic pathways. *Diabetes*. **59**, 3229-3239.

Speliotes EK, Willer CJ, Berndt SI, Monda KL, Thorleifsson G, Jackson AU, Lango Allen H, Lindgren CM, Luan J, Magi R, Randall JC, Vedantam S, Winkler TW, Qi L, Workalemahu T, Heid IM, Steinthorsdottir V, Stringham HM, Weedon MN, Wheeler E, Wood AR, Ferreira T, Weyant RJ, Segre AV, Estrada K, Liang L, Nemesh J, Park JH, Gustafsson S, Kilpelainen TO, Yang J, Bouatia-Naji N, Esko T, Feitosa MF, Kutalik Z, Mangino M, Raychaudhuri S, Scherag A, Smith AV, Welch R, Zhao JH, Aben KK, Absher DM, Amin N, Dixon AL, Fisher E, Glazer NL, Goddard ME, Heard-Costa NL, Hoesel V, Hottenga JJ, Johansson A, Johnson T, Ketkar S, Lamina C, Li S, Moffatt MF, Myers RH, Narisu N, Perry JR, Peters MJ, Preuss M, Ripatti S, Rivadeneira F, Sandholt C, Scott LJ, Timpson NJ, Tyrer JP, van Wingerden S, Watanabe RM, White CC, Wiklund F, Barlassina C, Chasman DI, Cooper MN, Jansson JO, Lawrence RW, Pellikka N, Prokopenko I, Shi J, Thiering E, Alavere H, Alibrandi MT, Almgren P, Arnold AM, Aspelund T, Atwood LD, Balkau B, Balmforth AJ, Bennett AJ, Ben-Shlomo Y, Bergman RN, Bergmann S, Biebermann H, Blakemore AI, Boes T, Bonnycastle LL, Bornstein SR, Brown MJ, Buchanan TA, Busonero F, Campbell H, Cappuccio FP, Cavalcanti-Proenca C, Chen YD, Chen CM, Chines PS, Clarke R, Coin L, Connell J, Day IN, den Heijer M, Duan J, Ebrahim S, Elliott P, Elosua R, Eiriksdottir G, Erdos MR, Eriksson JG, Facheris MF, Felix SB, Fischer-Posovszky P, Folsom AR, Friedrich N, Freimer NB, Fu M, Gaget S, Gejman PV, Geus EJ, Gieger C, Gjessing AP, Goel A, Goyette P, Grallert H, Grassler J, Greenawalt DM, Groves CJ, Gudnason V, Guiducci C, Hartikainen AL, Hassanali N, Hall AS, Havulinna AS, Hayward C, Heath AC, Hengstenberg C, Hicks AA, Hinney A, Hofman A, Homuth G, Hui J, Igl W, Iribarren C, Isomaa B, Jacobs KB, Jarick I, Jewell E, John U, Jorgensen T, Jousilahti P, Jula A, Kaakinen M, Kajantie E, Kaplan LM, Kathiresan S, Kettunen J, Kinnunen L, Knowles JW, Kolcic I, Konig IR, Koskinen S, Kovacs P, Kuusisto J, Kraft P, Kvaloy K, Laitinen J, Lantieri O, Lanzani C, Launer LJ, Lecoeur C, Lehtimaki T, Lettre G, Liu J, Lokki ML, Lorentzon M, Luben RN, Ludwig B, Magic, Manunta P, Marek D, Marre M, Martin NG, McArdle WL, McCarthy A, McKnight B, Meitinger T, Melander O, Meyre D, Midthjell K, Montgomery GW, Morken MA, Morris AP, Mulic R, Ngwa JS, Nelis M, Neville MJ, Nyholt DR, O'Donnell CJ, O'Rahilly S, Ong KK, Oostra B, Pare G, Parker AN, Perola M, Pichler I, Pietilainen KH, Platou CG, Polasek O, Pouta A, Rafelt S, Raitakari O, Rayner NW, Ridderstrale M, Rief W, Ruukonen A, Robertson NR, Rzehak P, Salomaa V, Sanders AR, Sandhu MS, Sanna S, Saramies J, Savolainen MJ, Scherag S, Schipf S, Schreiber S, Schunkert H, Silander K, Sinisalo J, Siscovick DS, Smit JH, Soranzo N, Sovio U, Stephens J, Surakka I, Swift AJ, Tammesoo ML, Tardif JC, Teder-Laving M, Teslovich TM, Thompson JR, Thomson B, Tonjes A, Tuomi T, van Meurs JB, van Ommen GJ, Vatin V, Viikari J, Visvikis-Siest S, Vitart V, Vogel CI, Voight BF, Waite LL, Wallaschofski H, Walters GB, Widen E, Wiegand S, Wild SH, Willemsen G, Witte DR, Wittman JC, Xu J, Zhang Q, Zgaga L, Ziegler A, Zitting P, Beilby JP, Farooqi IS, Hebebrand J, Huikuri HV, James AL, Kahonen M, Levinson DF, Macciardi F, Nieminen MS, Ohlsson C, Palmer LJ, Ridker PM, Stumvoll M, Beckmann JS, Boeing H, Boerwinkle E, Boomsma DI, Caulfield MJ, Chanock SJ, Collins FS, Cupples LA, Smith GD, Erdmann J, Froguel P, Gronberg H, Gyllensten U, Hall P, Hansen T, Harris TB, Hattersley AT, Hayes RB, Heinrich J, Hu FB, Hveem K, Illig T, Jarvelin MR, Kaprio J, Karpe F, Khaw KT, Kiemeny LA, Krude H, Laakso M, Lawlor DA, Metspalu A, Munroe PB, Ouwehand WH, Pedersen O, Penninx BW, Peters A, Pramstaller PP, Quertermous T, Reinehr T, Rissanen A, Rudan I, Samani NJ, Schwarz PE, Shuldiner AR, Spector TD, Tuomilehto J, Uda M, Uitterlinden A, Valle TT, Wabitsch M, Waeber G, Wareham NJ, Watkins H, Procardis C, Wilson JF,

- Wright AF, Zillikens MC, Chatterjee N, McCarroll SA, Purcell S, Schadt EE, Visscher PM, Assimes TL, Borecki IB, Deloukas P, Fox CS, Groop LC, Haritunians T, Hunter DJ, Kaplan RC, Mohlke KL, O'Connell JR, Peltonen L, Schlessinger D, Strachan DP, van Duijn CM, Wichmann HE, Frayling TM, Thorsteinsdottir U, Abecasis GR, Barroso I, Boehnke M, Stefansson K, North KE, McCarthy MI, Hirschhorn JN, Ingelsson E, Loos RJ (2010). Association analyses of 249,796 individuals reveal 18 new loci associated with body mass index. *Nature genetics*. **42**, 937-948.
- Suhre K, Shin SY, Petersen AK, Mohny RP, Meredith D, Wagele B, Altmaier E, CardioGram, Deloukas P, Erdmann J, Grundberg E, Hammond CJ, de Angelis MH, Kastenmuller G, Kottgen A, Kronenberg F, Mangino M, Meisinger C, Meitinger T, Mewes HW, Milburn MV, Prehn C, Raffler J, Ried JS, Romisch-Margl W, Samani NJ, Small KS, Wichmann HE, Zhai G, Illig T, Spector TD, Adamski J, Soranzo N, Gieger C (2011). Human metabolic individuality in biomedical and pharmaceutical research. *Nature*. **477**, 54-60.
- Voight BF, Scott LJ, Steinthorsdottir V, Morris AP, Dina C, Welch RP, Zeggini E, Huth C, Aulchenko YS, Thorleifsson G, McCulloch LJ, Ferreira T, Grallert H, Amin N, Wu G, Willer CJ, Raychaudhuri S, McCarroll SA, Langenberg C, Hofmann OM, Dupuis J, Qi L, Segre AV, van Hoek M, Navarro P, Ardlie K, Balkau B, Benediktsson R, Bennett AJ, Blagieva R, Boerwinkle E, Bonnycastle LL, Bengtsson Bostrom K, Bravenboer B, Bumpstead S, Burtt NP, Charpentier G, Chines PS, Cornelis M, Couper DJ, Crawford G, Doney AS, Elliott KS, Elliott AL, Erdos MR, Fox CS, Franklin CS, Ganser M, Gieger C, Grarup N, Green T, Griffin S, Groves CJ, Guiducci C, Hadjadj S, Hassanali N, Herder C, Isomaa B, Jackson AU, Johnson PR, Jorgensen T, Kao WH, Klopp N, Kong A, Kraft P, Kuusisto J, Lauritzen T, Li M, Lieveise A, Lindgren CM, Lyssenko V, Marre M, Meitinger T, Midthjell K, Morken MA, Narisu N, Nilsson P, Owen KR, Payne F, Perry JR, Petersen AK, Platou C, Proenca C, Prokopenko I, Rathmann W, Rayner NW, Robertson NR, Rocheleau G, Roden M, Sampson MJ, Saxena R, Shields BM, Shrader P, Sigurdsson G, Sparso T, Strassburger K, Stringham HM, Sun Q, Swift AJ, Thorand B, Tichet J, Tuomi T, van Dam RM, van Haeften TW, van Herpt T, van Vliet-Ostaptchouk JV, Walters GB, Weedon MN, Wijmenga C, Witteman J, Bergman RN, Cauchi S, Collins FS, Gloyn AL, Gyllensten U, Hansen T, Hide WA, Hitman GA, Hofman A, Hunter DJ, Hveem K, Laakso M, Mohlke KL, Morris AD, Palmer CN, Pramstaller PP, Rudan I, Sijbrands E, Stein LD, Tuomilehto J, Uitterlinden A, Walker M, Wareham NJ, Watanabe RM, Abecasis GR, Boehm BO, Campbell H, Daly MJ, Hattersley AT, Hu FB, Meigs JB, Pankow JS, Pedersen O, Wichmann HE, Barroso I, Florez JC, Frayling TM, Groop L, Sladek R, Thorsteinsdottir U, Wilson JF, Illig T, Froguel P, van Duijn CM, Stefansson K, Altshuler D, Boehnke M, McCarthy MI, investigators M, Consortium G (2010). Twelve type 2 diabetes susceptibility loci identified through large-scale association analysis. *Nature genetics*. **42**, 579-589.
- Westra HJ, Peters MJ, Esko T, Yaghootkar H, Schurmann C, Kettunen J, Christiansen MW, Fairfax BP, Schramm K, Powell JE, Zernakova A, Zernakova DV, Veldink JH, Van den Berg LH, Karjalainen J, Withoff S, Uitterlinden AG, Hofman A, Rivadeneira F, t Hoen PA, Reinmaa E, Fischer K, Nelis M, Milani L, Melzer D, Ferrucci L, Singleton AB, Hernandez DG, Nalls MA, Homuth G, Nauck M, Radke D, Volker U, Perola M, Salomaa V, Brody J, Suchy-Dicey A, Gharib SA, Enquobahrie DA, Lumley T, Montgomery GW, Makino S, Prokisch H, Herder C, Roden M, Grallert H, Meitinger T, Strauch K, Li Y, Jansen RC, Visscher PM, Knight JC, Psaty BM, Ripatti S, Teumer A, Frayling TM, Metspalu A, van Meurs JB, Franke L (2013). Systematic identification of trans eQTLs as putative drivers of known disease associations. *Nature genetics*. **45**, 1238-1243.
- Yang J, Lee SH, Goddard ME, Visscher PM (2011). GCTA: a tool for genome-wide complex trait analysis. *American journal of human genetics*. **88**, 76-82.
